# Supplementary material for: Highly regioselective nitrile oxide dipolar cycloadditions with ortho-nitrophenyl alkynes
Source: Royal Society of Chemistry journal article supplement (doi:10.1039/c2ob26267c), 2012-01-01

## Highly Regioselective Nitrile Oxide Dipolar Cycloadditions with *ortho*-Nitrophenyl Alkynes

Melissa L. McIntosh, Michael R. Naffziger, Bradley O. Ashburn, Lev N. Zakharov  
and Rich G. Carter\*

*Department of Chemistry, Oregon State University, Corvallis, OR 97331*

---

### Electronic Supplementary Information: NMR Spectra

---

## Highly Regioselective Nitrile Oxide Dipolar Cycloadditions with *ortho*-Nitrophenyl Alkynes

### Table of Contents

| Compound<br># | Page<br>Number |
|---------------|----------------|
| 10a           | S3             |
| 11            | S5             |
| 13a           | S7             |
| 13b           | S9             |
| 13c           | S11            |
| 13d           | S13            |
| 13e           | S15            |
| 13f           | S17            |
| 13g           | S19            |
| 13h           | S21            |
| 13i           | S23            |
| 13j           | S25            |
| 15b           | S27            |
| 17a           | S29            |
| 17b           | S31            |
| 17c           | S33            |
| 18            | S35            |
| 19            | S37            |
| 22            | S39            |
| 23            | S41            |
| 24            | S43            |
| 25            | S45            |

NAME Isoxazole1C1R2HAR40K  
EXPNO 3  
PROCNO 1  
Date\_ 20120502  
Time 17.38  
INSTRUM robinson  
PROBHD 5 mm PABBO BB-  
PULPROG zg30  
TD 32768  
SOLVENT CDCl3  
NS 18  
DS 2  
SWH 7183.908 Hz  
FIDRES 0.219235 Hz  
AQ 2.2807028 sec  
RG 181  
DE 69.600 usec  
TE 6.50 usec  
D1 298.2 K  
D0 2.0000000 sec  
TD0 1  
===== CHANNEL f1 =====  
NUC1 1H  
P1 14.00 usec  
PL1 0.00 dB  
SF01 400.1428010 MHz  
SI 32768  
SF 400.1400000 MHz  
WDW EM  
SSB 0  
LB 0.30 Hz  
GB 0  
PC 1.00

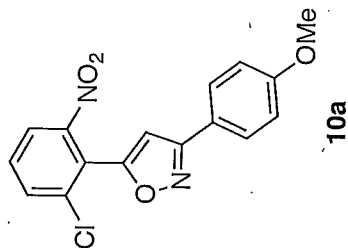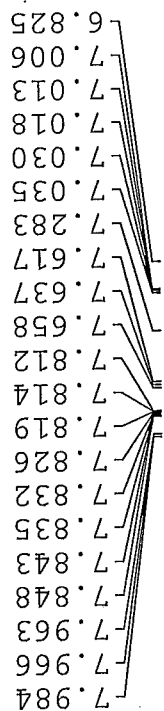

3.895

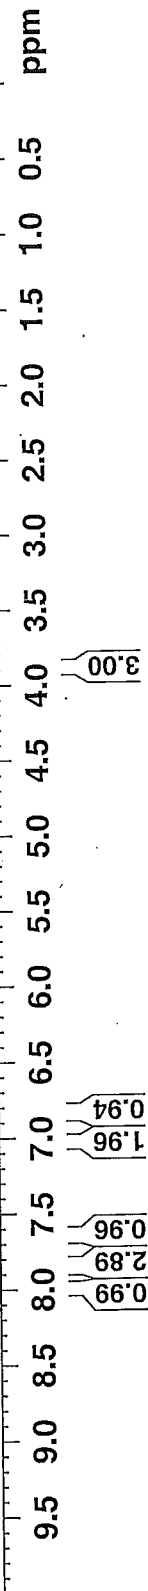

NAME Isoxazole1e1ClR2Har40K  
EXPNO 4  
PROCNO 1  
Date\_ 20120502  
Time 17.42  
INSTRUM robinson  
PROBHD 5 mm PABBO BB-  
PULPROG zgpg30  
TD 65536  
SOLVENT CDCl3  
NS 724  
DS 4  
SWH 23980.814 Hz  
FIDRES 0.365918 Hz  
AQ 1.3664756 sec  
RG 32768  
DW 20.850 usec  
DE 6.50 usec  
TE 298.7 K  
D1 1.00000000 sec  
D11 0.03000000 sec  
TD0 1

===== CHANNEL f1 =====  
NUC1 13C  
P1 9.00 usec  
PL1 -2.00 dB  
SFO1 100.6253446 MHz

===== CHANNEL f2 =====  
CPDPRG2 waltz16  
NUC2 1H  
PCPD2 90.00 usec  
PL2 0.00 dB  
PL12 16.16 dB  
PL13 17.00 dB  
SFO2 400.1416006 MHz  
SI 32768  
SF 100.6152830 MHz  
WDW EM  
SSB 0  
LB 3.00 Hz  
GB 0  
PC 1.40

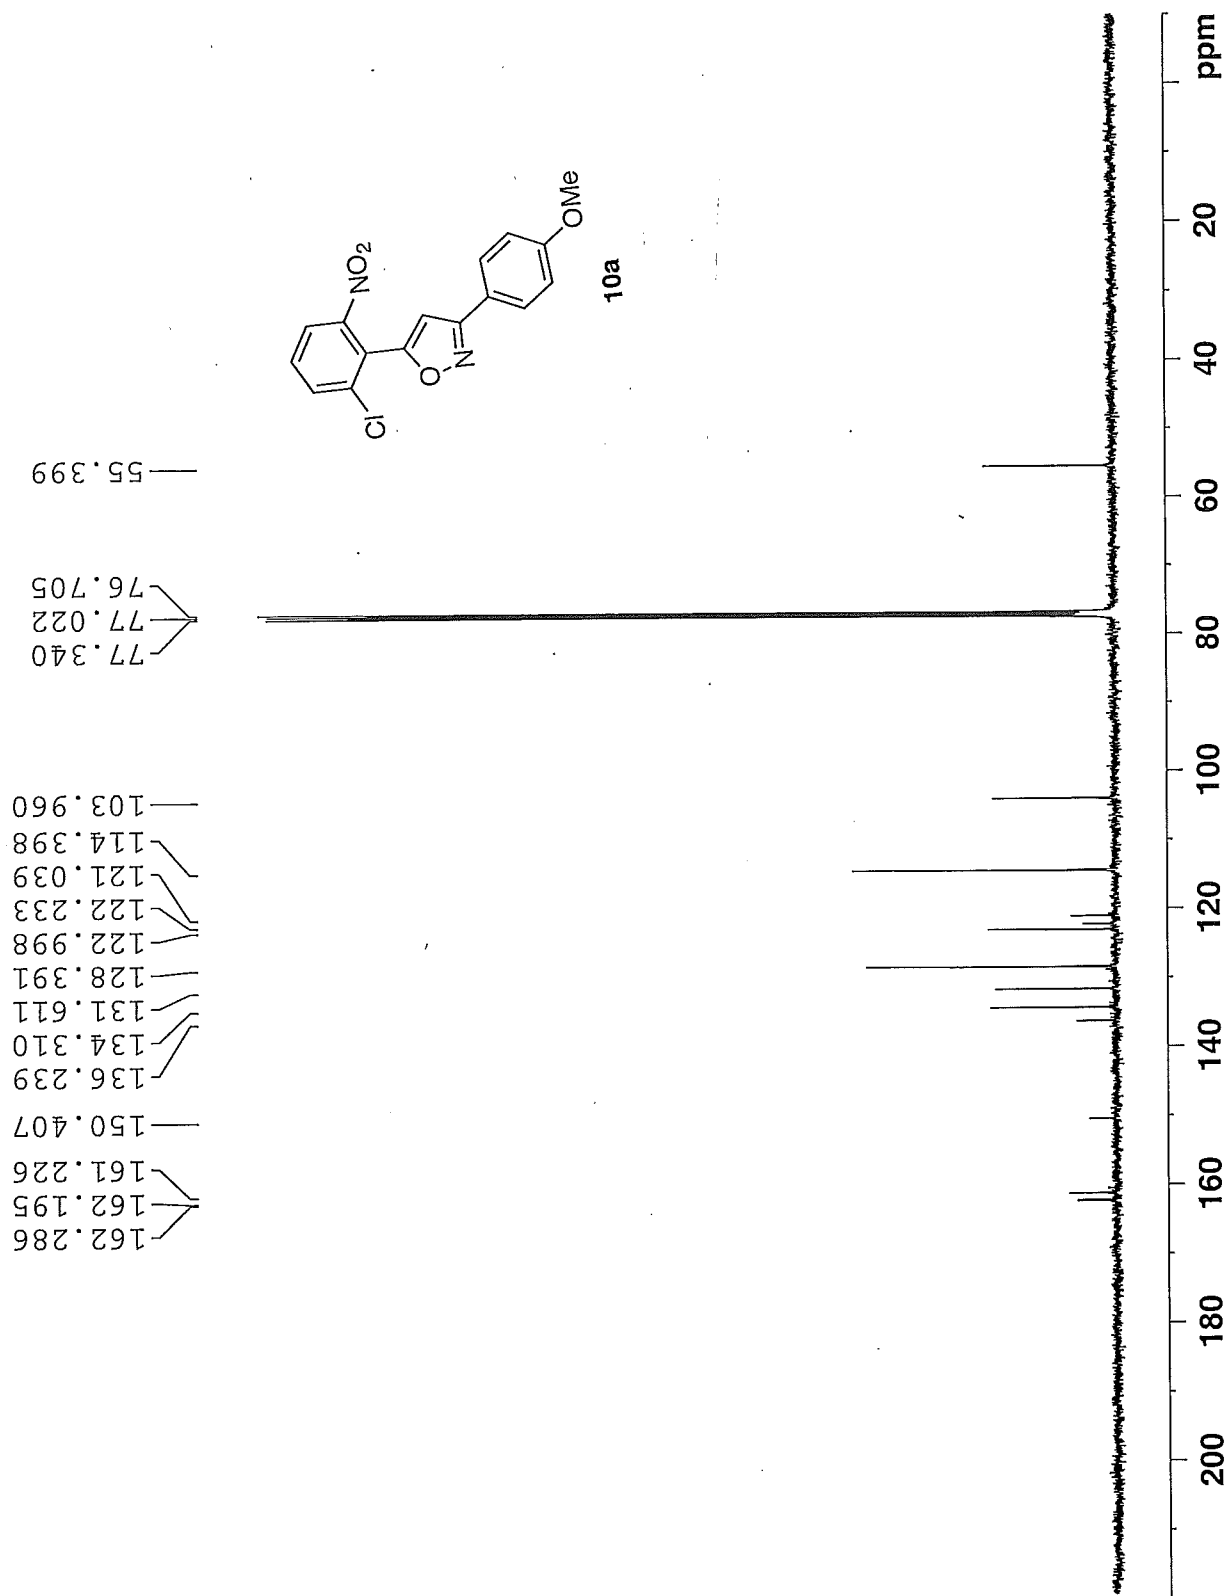

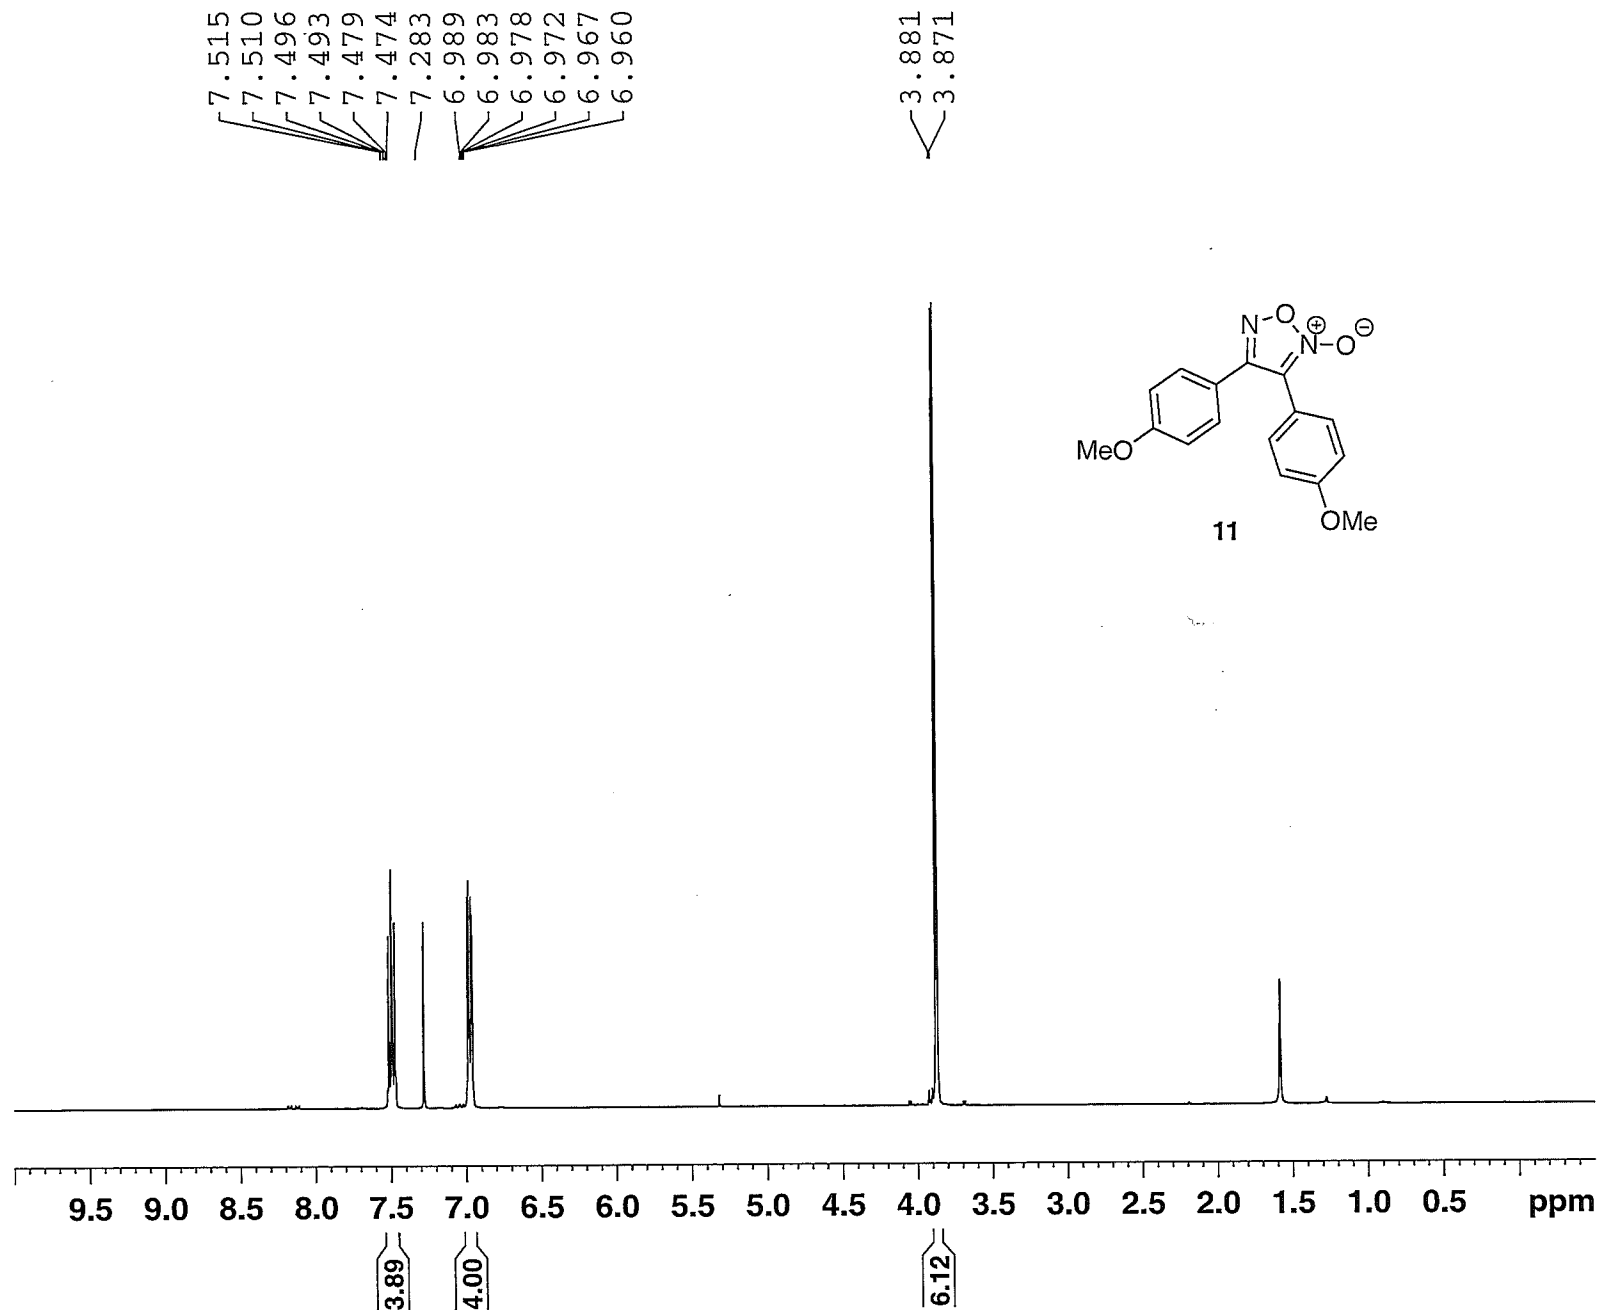

```

NAME          MLM-V-014
EXPNO         5
PROCNO        1
Date_         20120906
Time          18.44
INSTRUM       robinson
PROBHD        5 mm PABBO BB-
PULPROG       zg30
TD            32768
SOLVENT       CDCl3
NS            6
DS            0
SWH           7183.908 H.
FIDRES        0.219235 H.
AQ            2.2807028 s.
RG            161.3
DW            69.600 u.
DE            6.50 u.
TE            298.2 K
D1            2.00000000 s.
TD0           1
  
```

```

===== CHANNEL f1 =====
NUC1          1H
P1            14.00 u.
PL1           0.00 d.
SFO1          400.1428010 M
SI            32768
SF            400.1400000 M
WDW           EM
SSB           0
LB            0.30 H.
GB            0
PC            1.00
  
```

NAME MLM-V-014  
EXPNO 6  
PROCNO 1  
Date\_ 20120906  
Time 18.50  
INSTRUM robinson  
PROBHD 5 mm PABBO BB-  
PULPROG zgpg30  
TD 65536  
SOLVENT CDCl3  
NS 562  
DS 0  
SWH 23980.814 H  
FIDRES 0.365918 H  
AQ 1.3664756 s  
RG 32768  
DW 20.850 u  
DE 6.50 u  
TE 298.9 K  
D1 1.00000000 s  
D11 0.03000000 s  
TD0 1  
===== CHANNEL f1 =====  
NUC1 13C  
P1 9.00 u  
PL1 -2.00 d  
SFO1 100.6253446 M  
===== CHANNEL f2 =====  
CPDPRG2 waltz16  
NUC2 1H  
PCPD2 90.00 u  
PL2 0.00 d  
PL12 16.16 d  
PL13 17.00 d  
SFO2 400.1416006 M  
SI 32768  
SF 100.6152830 M  
WDW EM  
SSB 0  
LB 3.00 H  
GB 0  
PC 1.40

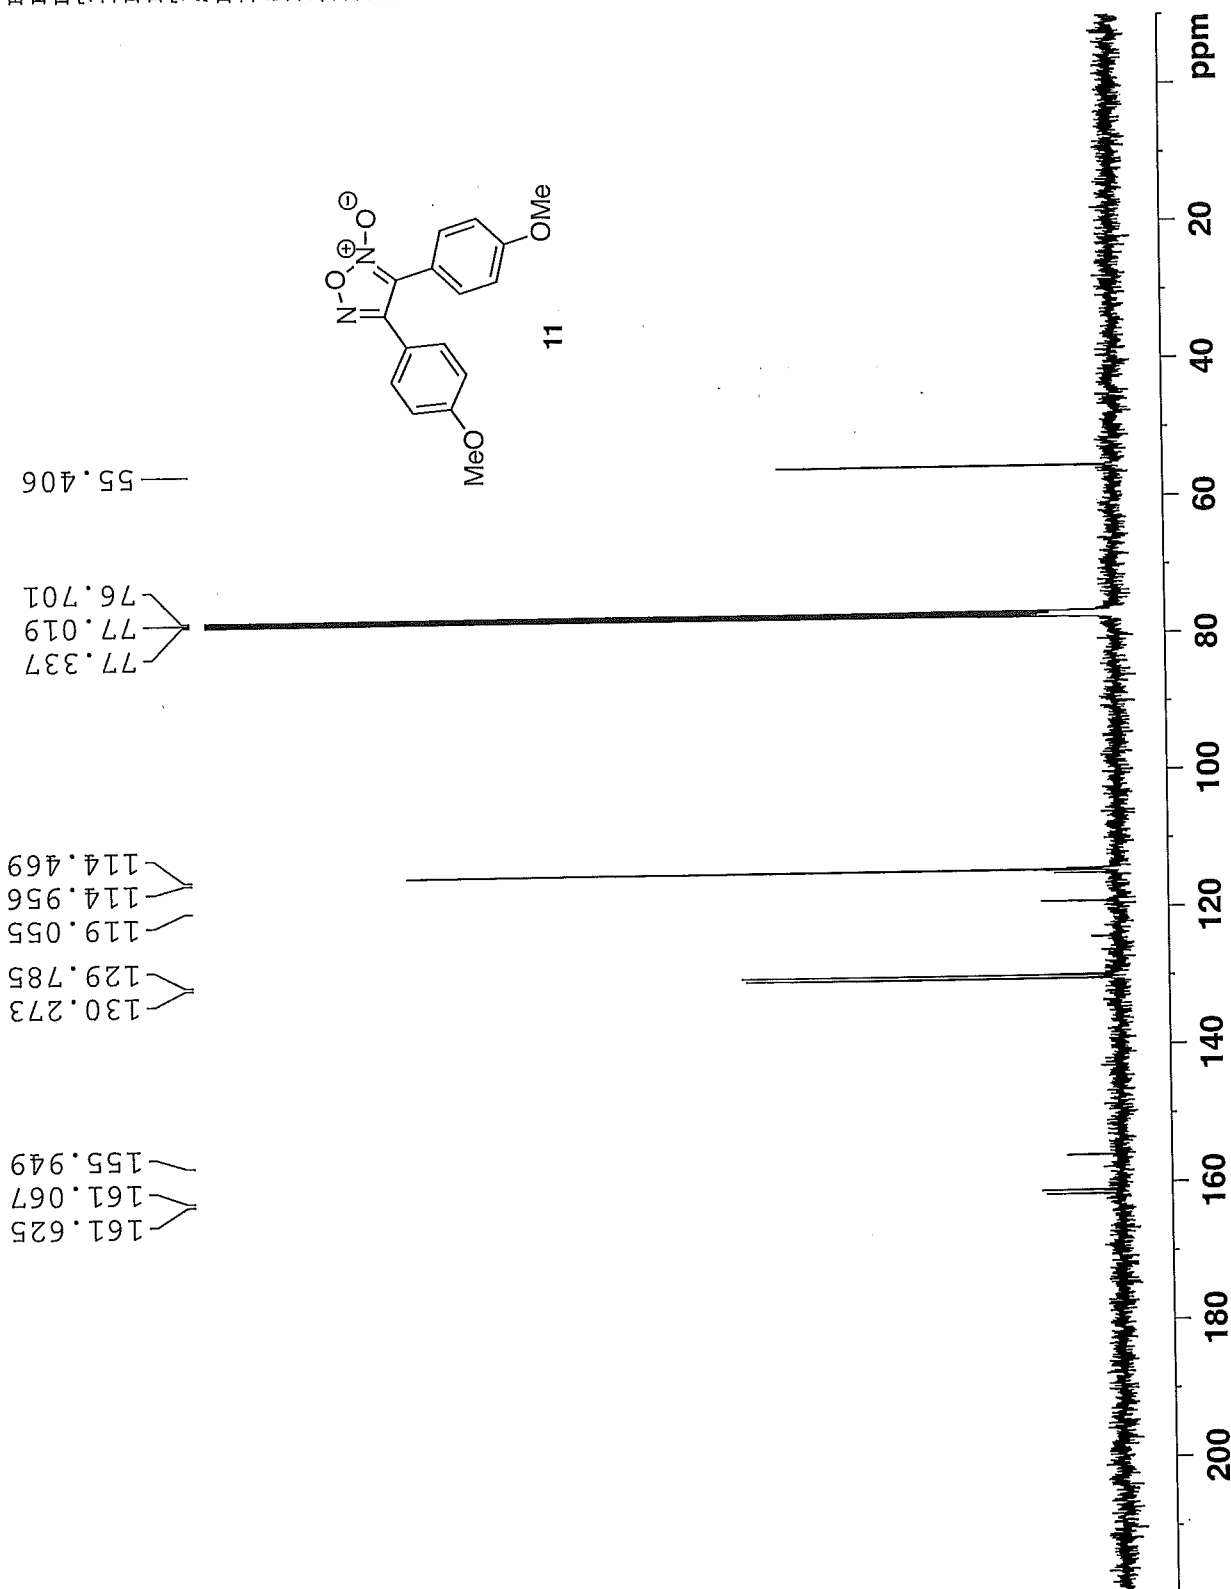

| Year | Number of employees (thousands) |
|------|---------------------------------|
| 1997 | 6,500                           |
| 1998 | 7,000                           |
| 1999 | 6,900                           |
| 2000 | 7,100                           |
| 2001 | 7,200                           |
| 2002 | 7,300                           |
| 2003 | 7,400                           |
| 2004 | 7,500                           |
| 2005 | 7,600                           |
| 2006 | 7,700                           |
| 2007 | 8,000                           |

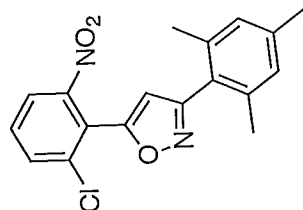

13a

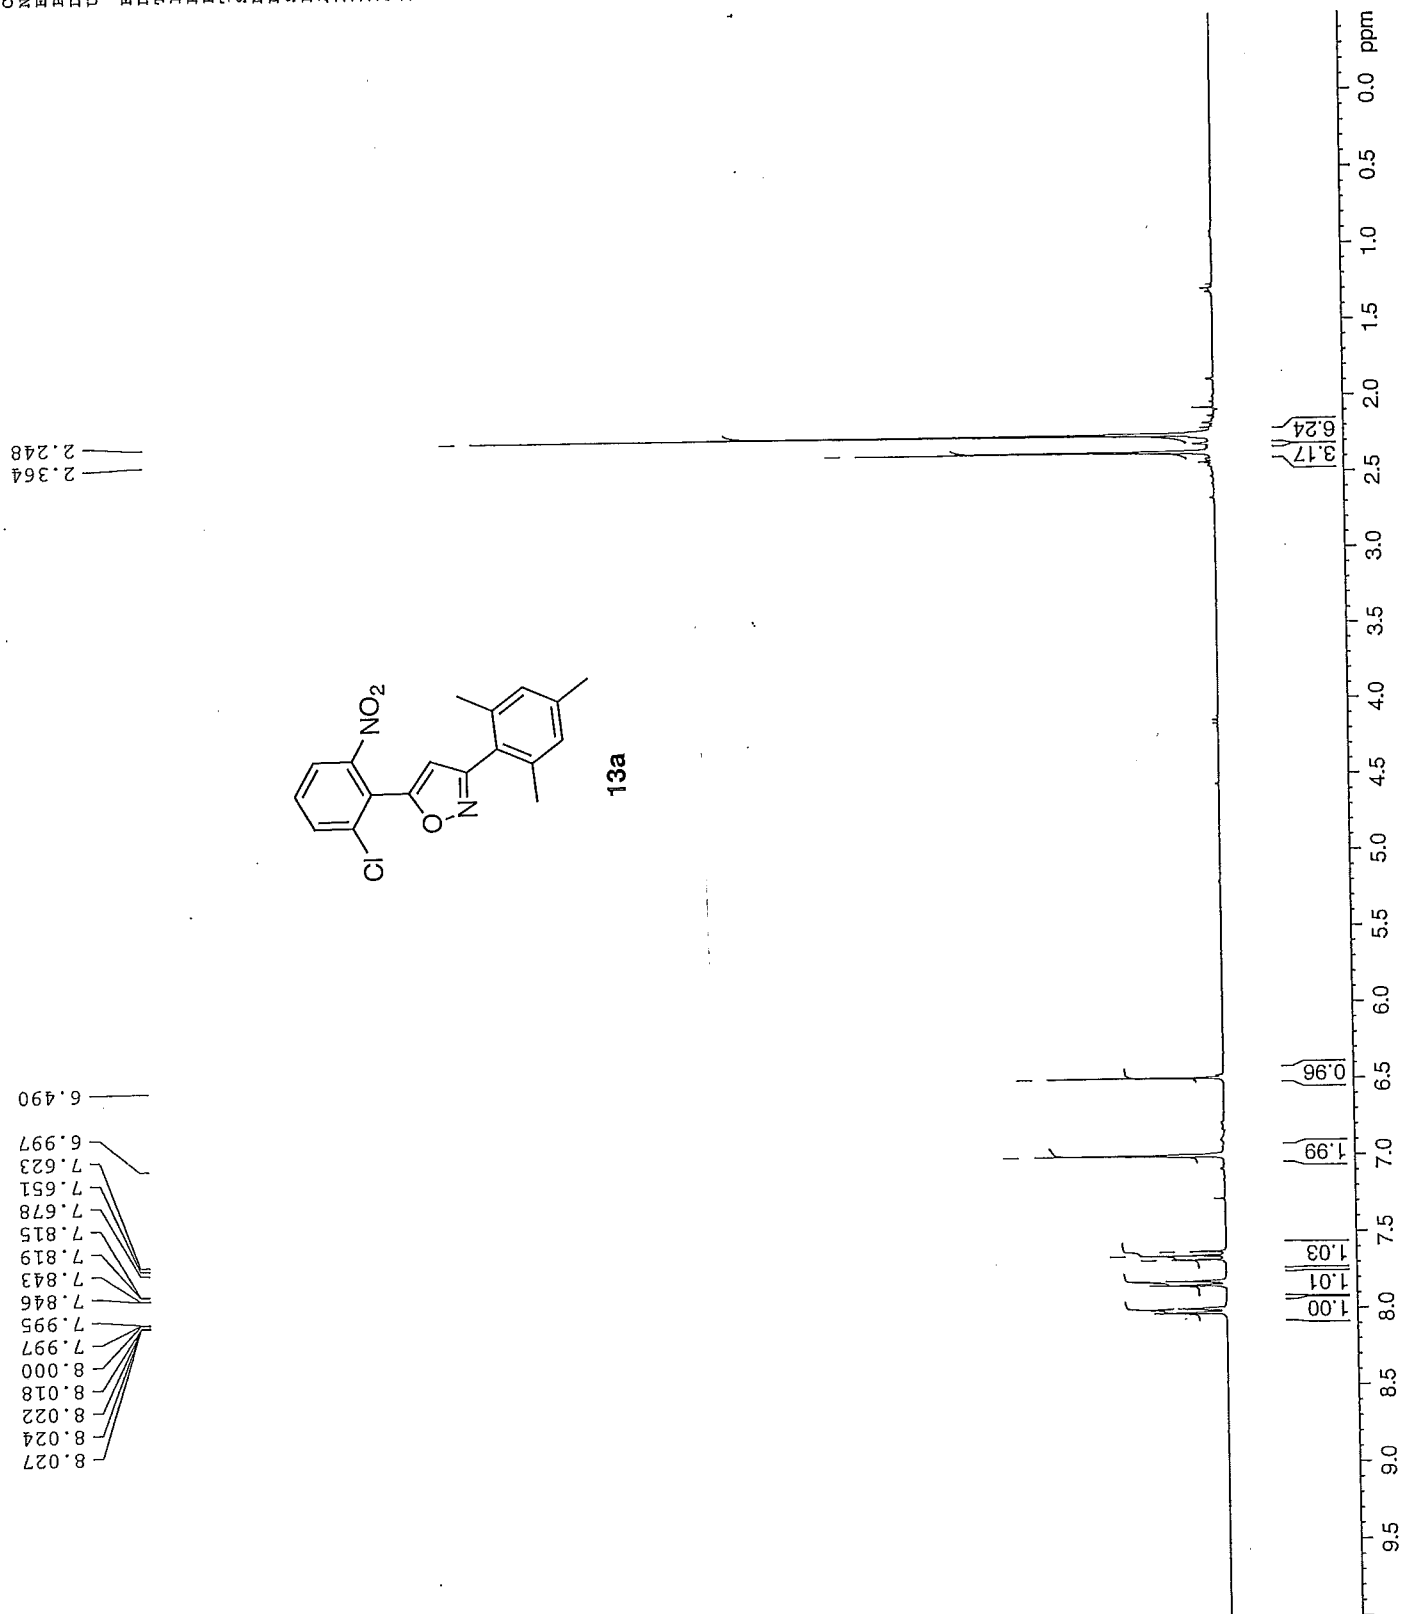

prep

Current Data Parameters  
NAME MRN9095  
EXPNO 13  
PROCNO 1  
DU /n  
USER michaeln

F2 - Acquisition Parameters  
Date\_ 20090309  
Time\_ 10.47  
INSTRUM DPX300  
PROBHD 5 mm QNP 1H/1  
PULPROG zgpg30  
TD 65536  
SOLVENT CDCl3  
NS 5  
DS 4  
SWH 18832.393 Hz  
FIDRES 0.287360 Hz  
AQ 1.7400308 sec  
RG 9195.2  
DW 26.550 usec  
DE 6.00 usec  
TE 298.2 K  
D1 0.15000001 sec  
d11 0.03000000 sec  
DELTA 0.05000000 sec  
TDO 1

===== CHANNEL f1 =====  
NUC1 13C  
P1 8.80 usec  
PL1 -3.00 dB  
SFO1 75.4760505 MHz

===== CHANNEL f2 =====  
CPDPRG2 waltz16  
NUC2 1H  
PCPD2 80.00 usec  
PL2 -3.00 dB  
PL12 17.55 dB  
PL13 17.55 dB  
SFO2 300.1312005 MHz

F2 - Processing parameters  
SI 32768  
SF 75.4677490 MHz  
WDW EM  
SSB 0  
LB 3.00 Hz  
GB 0  
PC 1.40

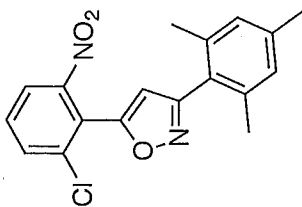

13a

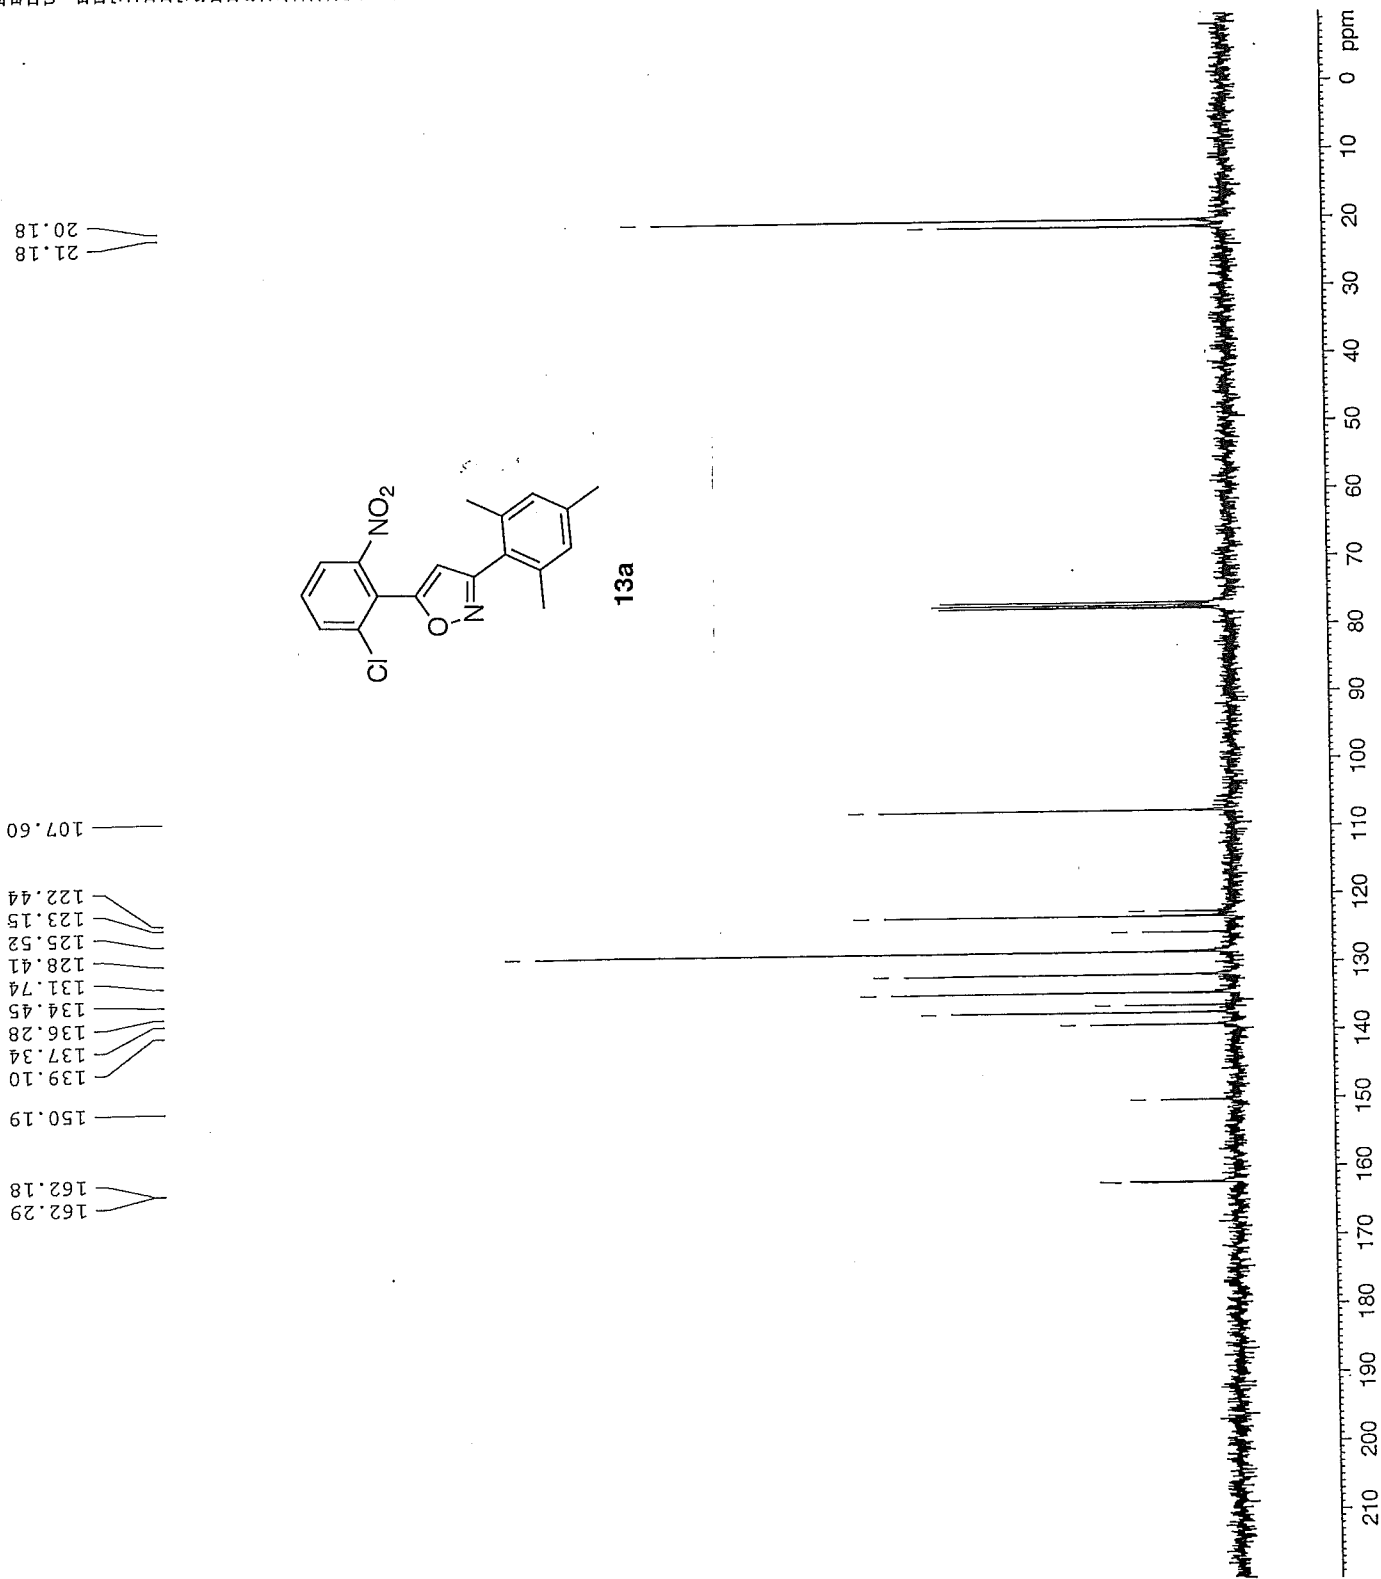



oxazole

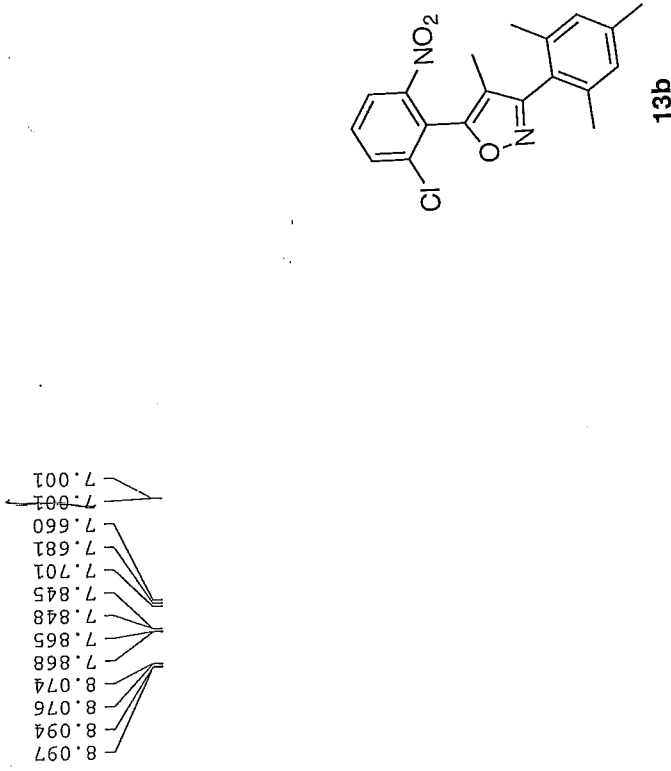

8.097  
8.094  
8.076  
8.074  
7.868  
7.865  
7.848  
7.845  
7.701  
7.681  
7.660  
7.001  
7.001

2.368  
2.179  
1.750

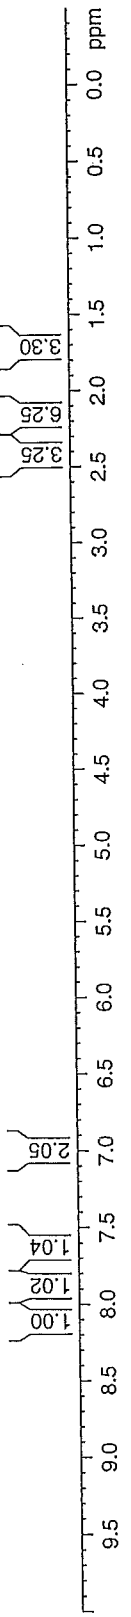

Current Data Parameters  
NAME u  
EXPNO 21  
PROCNO 1  
DU /m  
USER michaeln

F2 - Acquisition Parameters  
Date\_ 20090720  
Time 13.49  
INSTRUM DPX400  
PROBHD 5 mm BBO BB-1H  
PULPROG zg30  
TD 32768  
SOLVENT  
NS 6  
DS 2  
SWH 6410.256 Hz  
FIDRES 0.195425 Hz  
AQ 2.555940 sec  
RG 128  
DW 78.000 usec  
DE 6.00 usec  
TE 299.2 K  
D1 2.0000000 sec  
TD0 1

===== CHANNEL f1 =====  
NUC1 1H  
P1 14.70 usec  
PL1 0.00 dB  
SF01 399.9528000 MHz

F2 - Processing parameters  
SI 32768  
SF 399.9500000 MHz  
WDW no  
SSB 0  
LB 0.00 Hz  
GB 0  
PC 1.00

oxazole

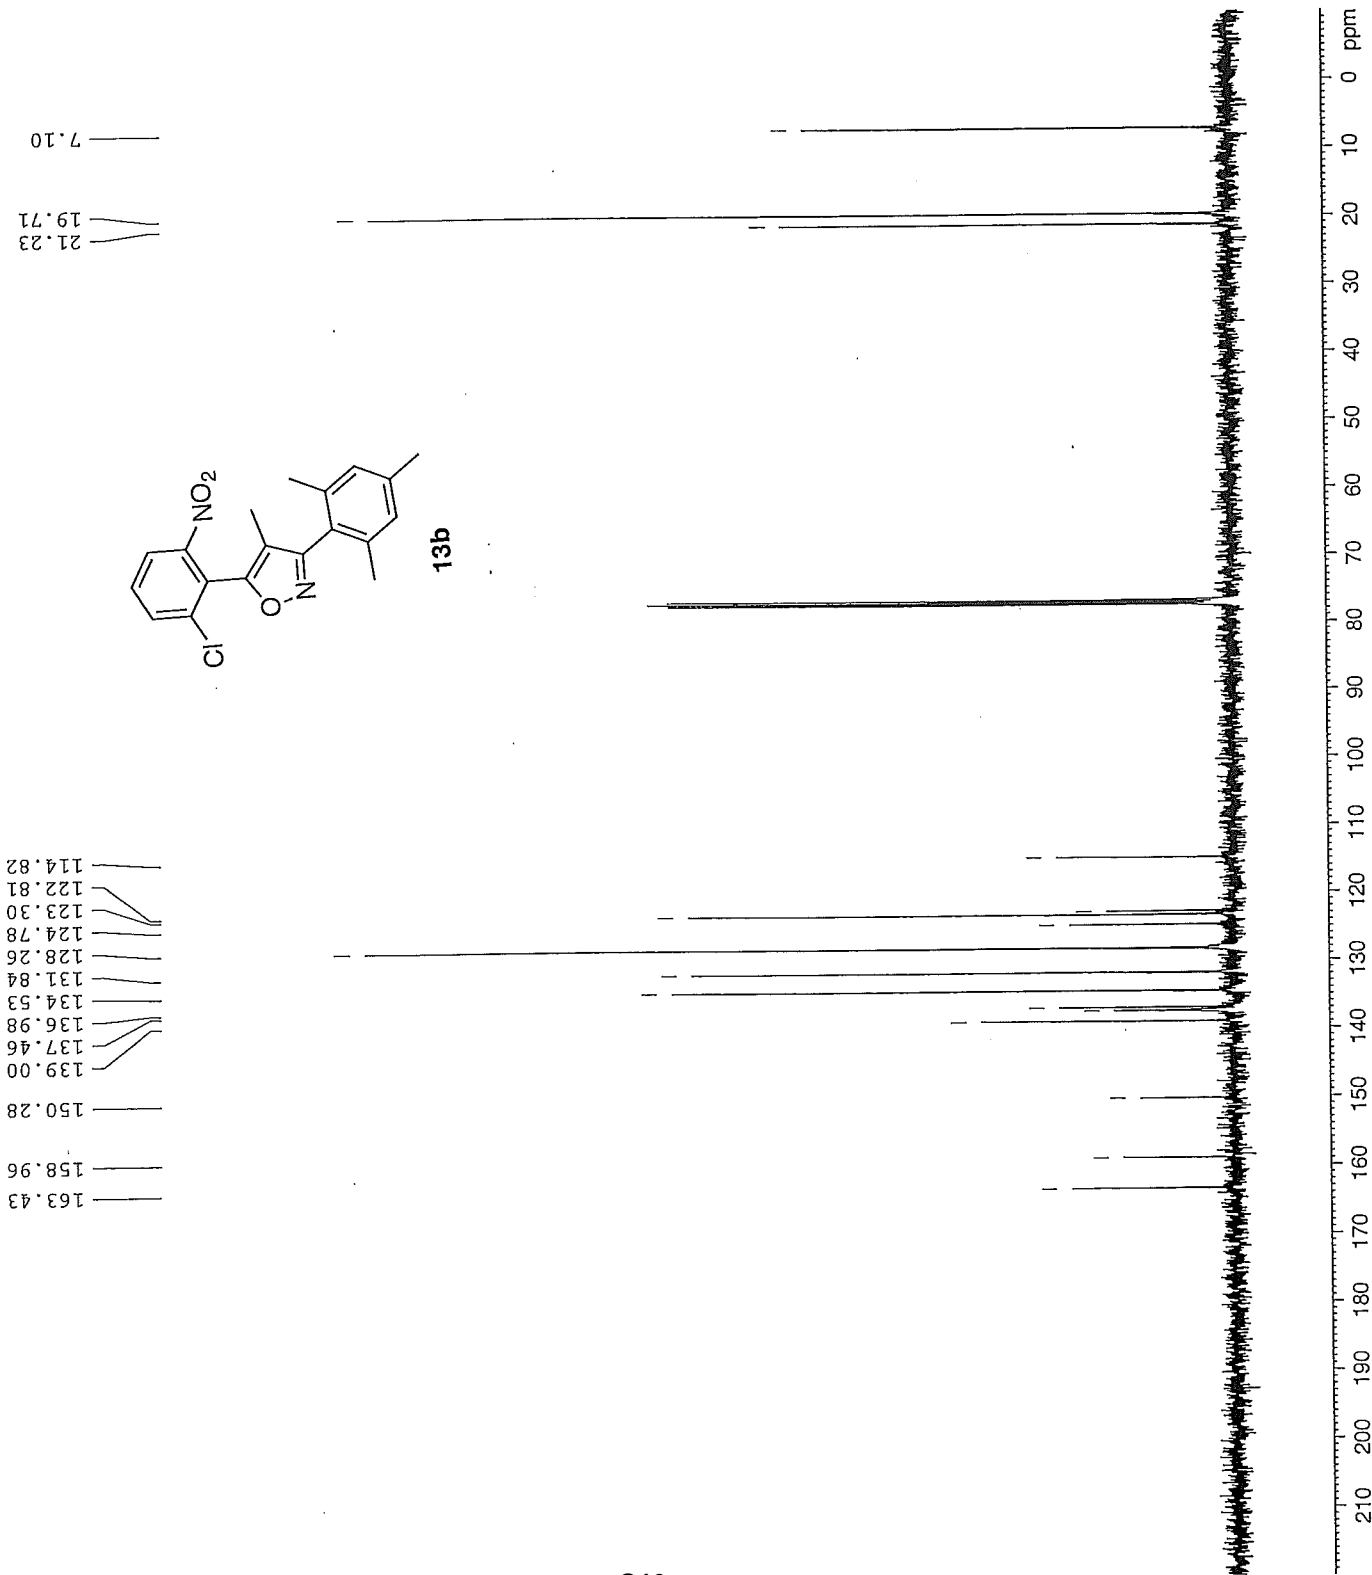

Current Data Parameters

NAME u  
EXPNO 22  
PROCNO 1  
DU /m  
USER michaeln

F2 - Acquisition Parameters

Date\_ 20090720  
Time 13.52  
INSTRUM DFX400  
PROBHD 5 mm BBO BB-1H  
PULPROG zgpg30  
TD 65536  
SOLVENT  
NS 296  
DS 4  
SWH 25125.629 Hz  
FIDRES 0.138387 Hz  
AQ 1.3042164 sec  
RG 5160.6  
DW 19.900 usec  
DE 6.00 usec  
TE 299.2 K  
D1 0.15000001 sec  
d11 0.03000000 sec  
DELTA 0.05000000 sec  
TDO 1

===== CHANNEL f1 =====

NUC1 13C  
P1 7.80 usec  
PL1 -3.00 dB  
SFO1 100.5785700 MHz

===== CHANNEL f2 =====

CPDPRG2 waltz16  
NUC2 1H  
PCPD2 135.00 usec  
PL2 17.40 dB  
PL12 17.40 dB  
PL13 17.40 dB  
SFO2 399.9516000 MHz

F2 - Processing parameters

SI 32768  
SF 100.5675080 MHz  
WDW EM  
SSB 0  
LB 3.00 Hz  
GB 0  
PC 1.40

Current Data Parameters  
NAME MLM-I-019  
EXPNO 4  
PROCNO 1

F2 - Acquisition Parameters:  
Date\_ 20100712  
Time 10.13  
INSTRUM robinson  
PROBHD 5 mm PABBO BB-  
PULPROG zg30  
TD 32768  
SOLVENT CDCl3  
NS 32  
DS 2  
SWH 6793.478 Hz  
FIDRES 0.207320 Hz  
AQ 2.4117749 sec  
RG 128  
DM 73.600 us  
DE 6.50 us  
TE 298.7 K  
D1 2.0000000 sec  
TD0 1

===== CHANNEL f1 =====  
NUC1 1H  
P1 14.00 us  
PL1 0.00 dB  
SFO1 400.1424008 MHz

F2 - Processing parameters  
SI 65536  
SF 400.1400000 MHz  
WDW EM  
SSB 0  
LB 0.30 Hz  
GB 0  
PC 1.00

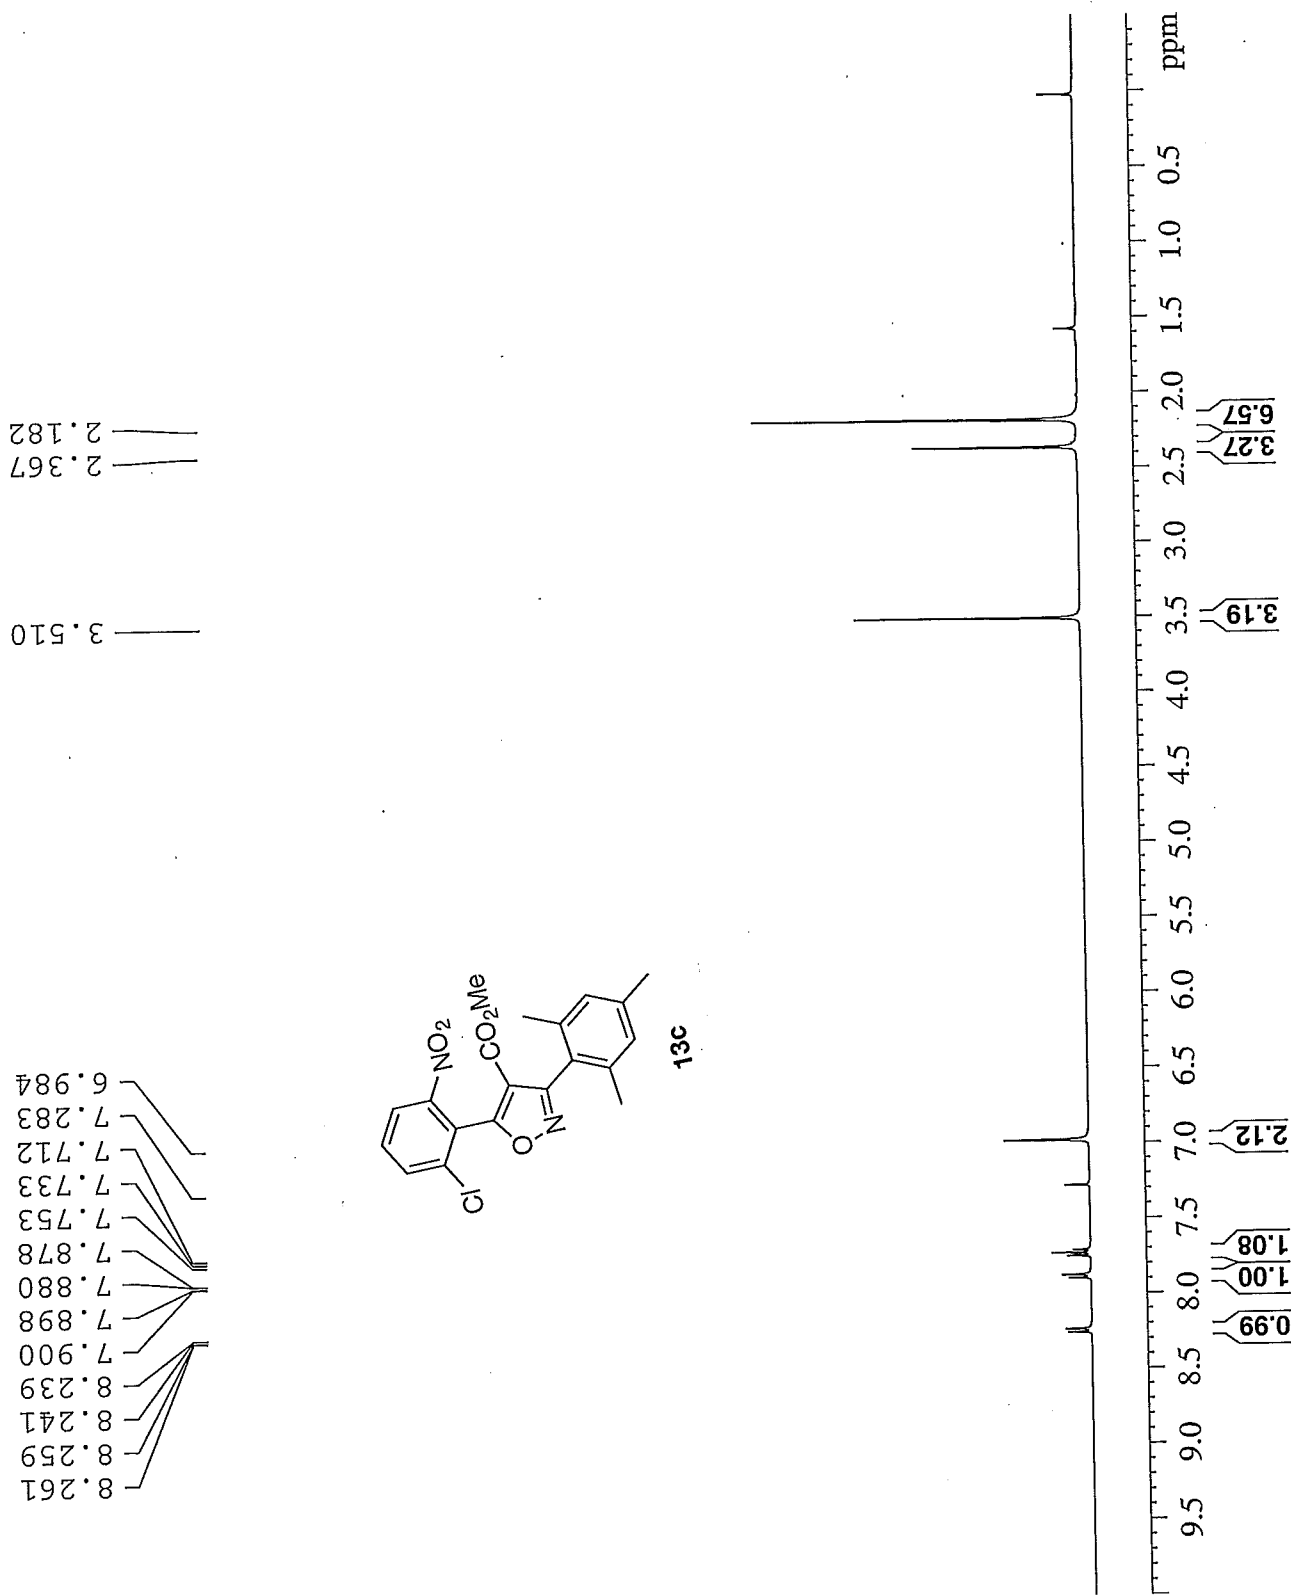

```

Current Data Parameters
NAME      MLM-I-019
EXPNO     5
PROCNO    1

F2 - Acquisition Parameters
Date_     20100713
Time      13.19
INSTRUM   DPX400
PROBHD    5 mm BBO BB-1H
PULPROG   zgpg30
TD         65536
SOLVENT   CDCl3
NS         3000
DS         4
SWH        23980.814 Hz
FIDRES     0.365918 Hz
AQ         1.3664756 sec
RG         18390.4
DE         20.850 usec
TE         299.2 K
D1         0.20000000 sec
d11        0.03000000 sec
DELTA      0.10000000 sec
TD0        1

===== CHANNEL f1 =====
NUC1       13C
P1         8.30 usec
PL1        -3.00 dB
SFO1       100.6517495 MHz

===== CHANNEL f2 =====
CPDPRG2    waltz16
NUC2       1H
PCPD2      90.00 usec
PL2        -3.00 dB
PL12       15.00 dB
PL13       15.00 dB
SFO2       400.2466010 MHz

F2 - Processing parameters
SI         65536
SF         100.6416850 MHz
WDW        EM
SSB        0
LB         1.00 Hz
GB         0
PC         1.40

```

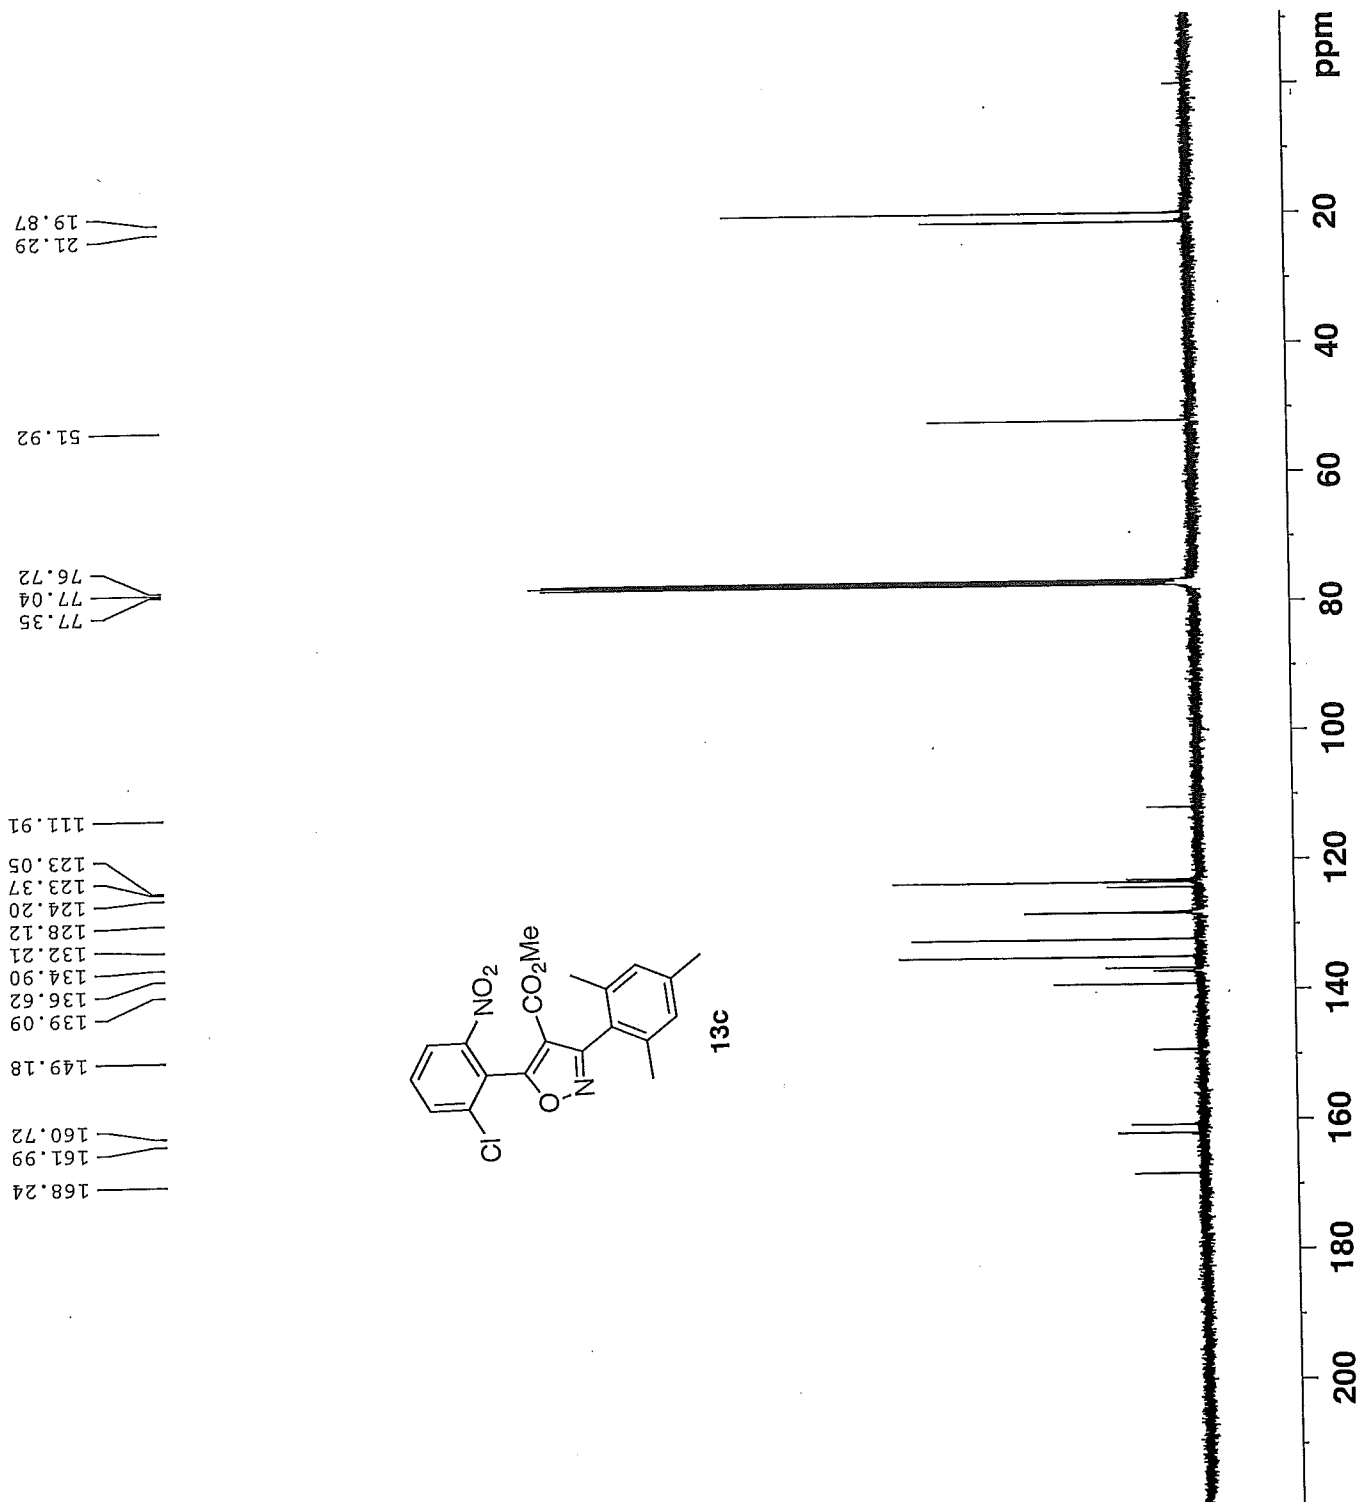

chloro bromo mesityl oxazole

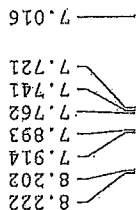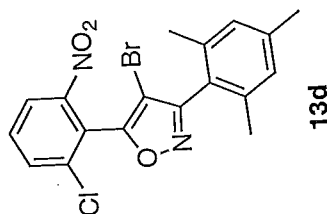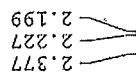

Current Data Parameters  
NAME MEN10011  
EXPNO 20  
PROCNO 1  
DT /m  
USER michaeln

F2 - Acquisition Parameters  
Date\_ 20101109  
Time\_ 19.16  
INSTRUM DEK400  
PROBHD 5 mm BBO BB-4H  
PULPROG zgpg30  
TD 32768  
SOLVENT CDCl3  
NS 10  
DS 2  
SWH 6410.256 Hz  
FIDRES 0.185623 Hz  
AQ 2.5559540 sec  
RG 322.5  
DM 78.000 usec  
DE 6.00 usec  
TE 298.2 K  
D1 2.0000000 sec  
TD0 1

===== CHANNEL f1 =====  
NUC1 1H  
P1 13.50 usec  
PL -3.00 dB  
SFO1 400.2478017 MHz

F2 - Processing parameters  
SI 32768  
SF 400.2450000 MHz  
WDW no  
SSB 0  
LB 0.00 Hz  
GB 0  
PC 1.00

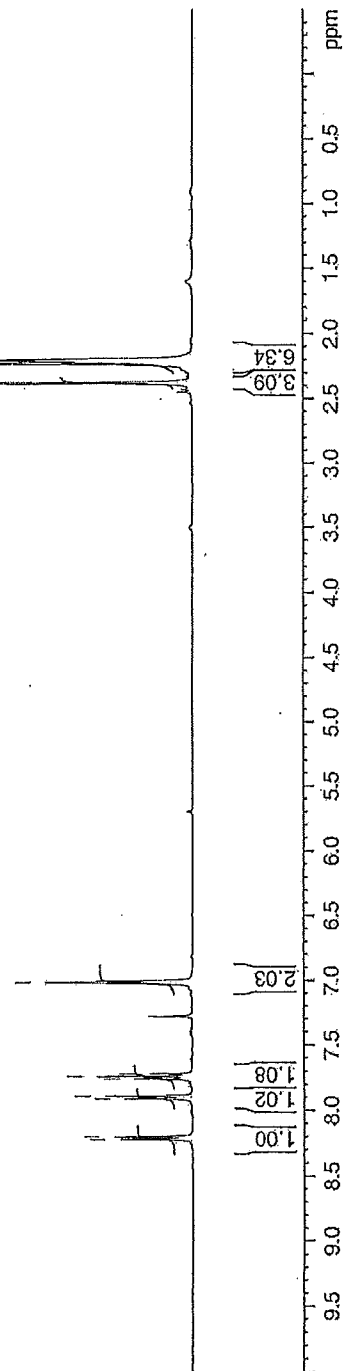

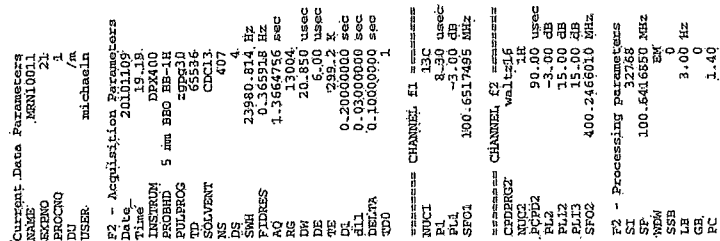

NAME MRN10010  
EXPNO 1  
PROCNO 1  
Date\_ 20101107  
Time 23.09  
INSTRUM robinson  
PROBHD 5 mm PABBO BB-  
PULPROG zgpg30  
TD 32768  
SOLVENT CDC13  
NS 15  
DS 2  
SWE 6793.478 Hz  
FIDRES 0.207320 Hz  
AQ 2.4117749 sec  
RG 90.5  
DW 73.600 usec  
DE 6.50 usec  
TE 299.5 K  
D1 2.00000000 sec  
TD0 1

===== CHANNEL f1 =====  
NUC1 1H  
P1 14.00 usec  
PL 0.00 dB  
SF01 400.1424008 MHz  
SI 32768  
SF 400.1400000 MHz  
WDW no  
SSB 0  
LB 0.00 Hz  
GB 0  
PC 1.00

bis chloro oxazole

7.020  
7.721  
7.742  
7.762  
7.891  
7.893  
7.911  
7.913  
8.189  
8.191  
8.210  
8.212

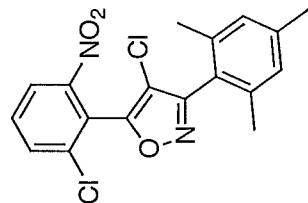

13e

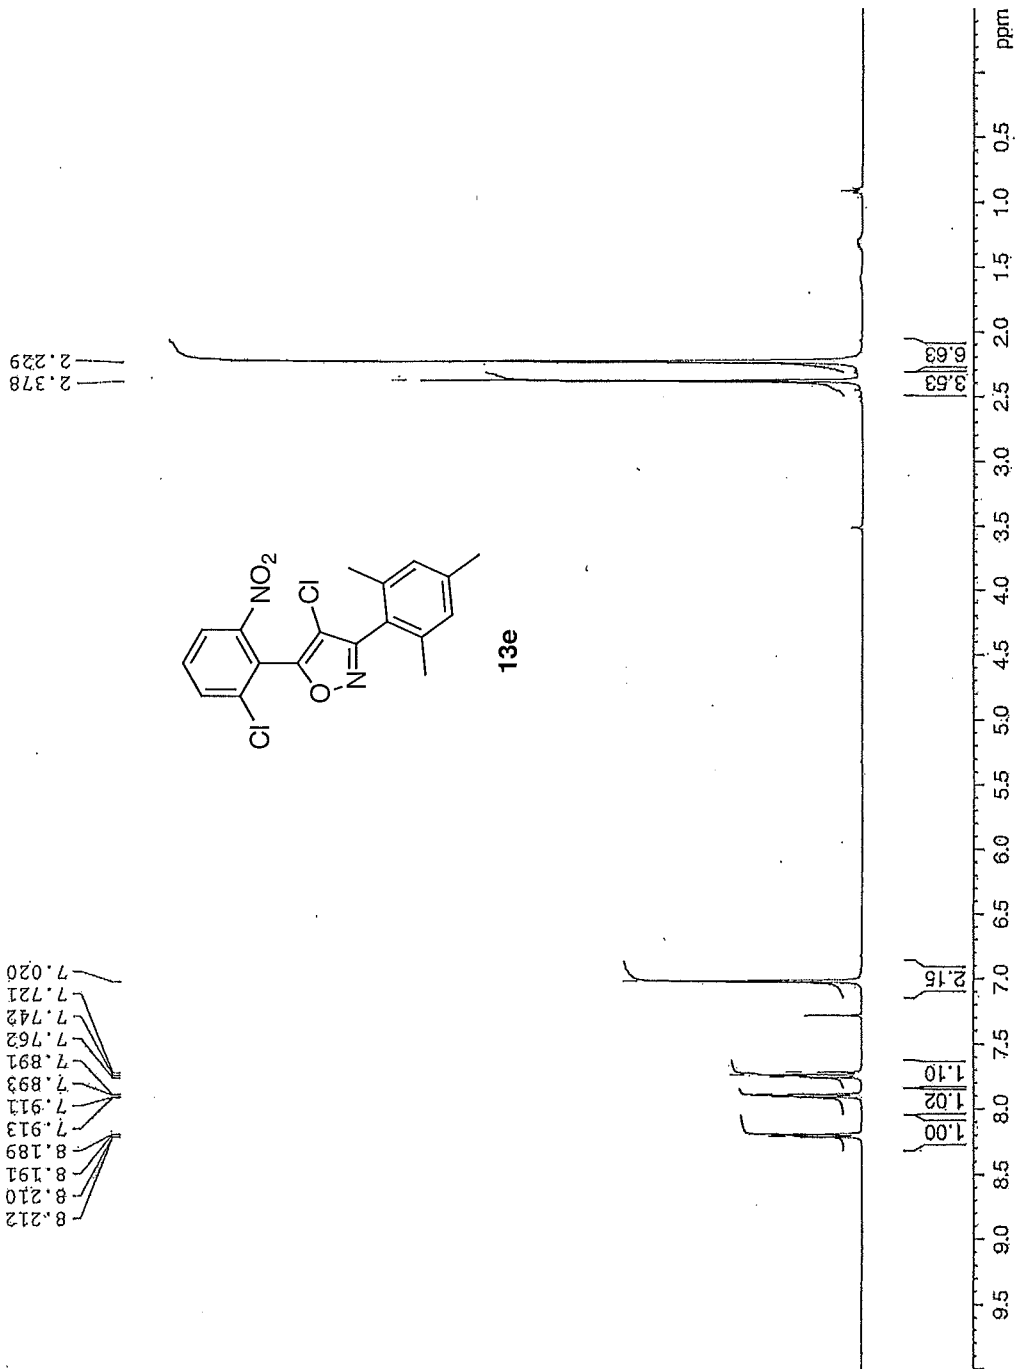

bis chloro oxazole

NAME MRN10010  
EXPNO 2  
PROCNO 1  
Date\_ 20101107  
Time 23.13  
INSTRUM robinson  
PROBHD 5 mm PABBO-  
PULPROG zgpg30  
TD 65536  
SOLVENT CCl<sub>4</sub>  
NS 1584  
DS 4  
SWH 23980.814 Hz  
FIDRES 0.365918 Hz  
AQ 1.366756 sec  
RG 14396.5  
DW 20.850 usec  
DE 6.50 usec  
TE 301.3 K  
D1 0.20000000 sec  
D11 0.03000000 sec  
TD0 1  
===== CHANNEL F1 =====  
NUC1 <sup>13</sup>C  
P1 9.00 usec  
PL1 -2.00 dB  
SFO1 100.6259446 MHz  
===== CHANNEL F2 =====  
CPDPRG2 waltz16  
NUC2 <sup>1</sup>H  
PCPD2 90.00 usec  
PL2 0.00 dB  
PL12 16.16 dB  
PL13 17.00 dB  
SFO2 400.1416006 MHz  
SI 32768  
SF 100.6152830 MHz  
WDW EM  
SSB 0  
LB 1.00 Hz  
GB 0  
PC 1.40

21.2  
19.7

161.5  
159.4  
149.7  
139.8  
137.9  
137.4  
134.9  
132.6  
128.4  
123.6  
122.6  
120.9  
111.2

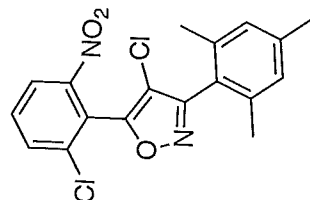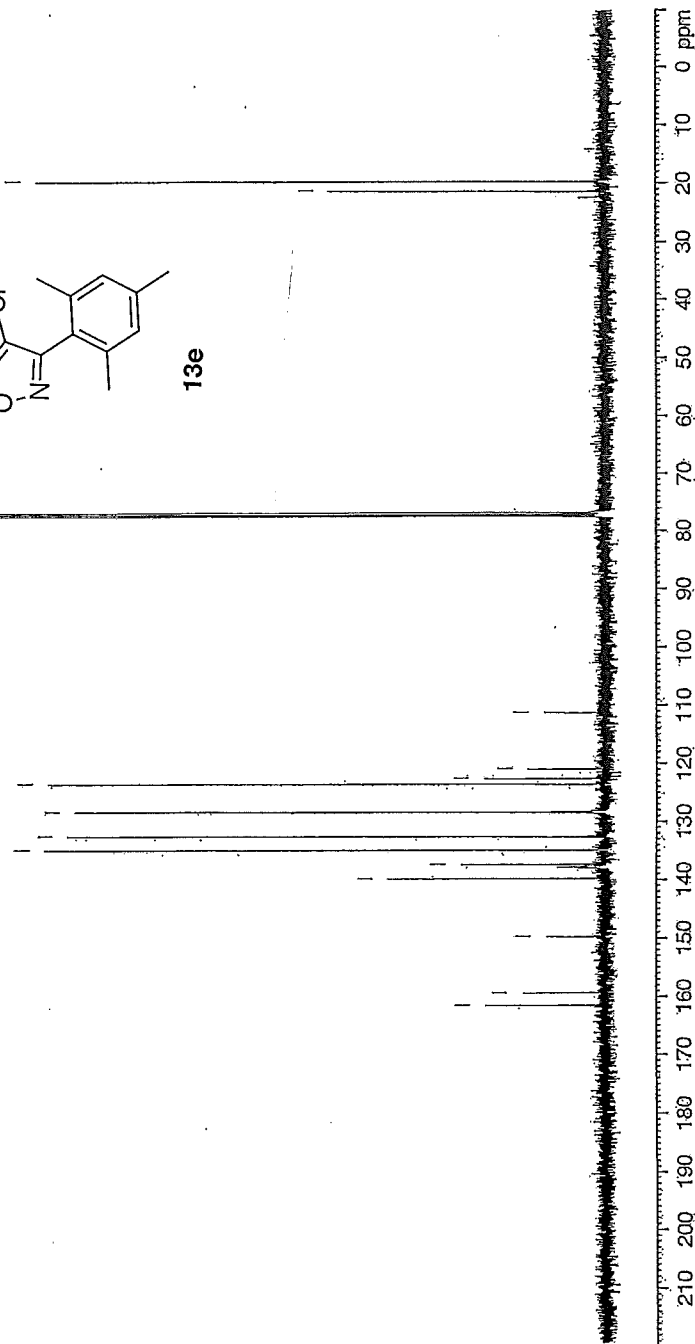



2.374  
2.215

8.207  
8.187  
7.841  
7.825  
7.823  
7.821  
7.760  
7.281  
7.012

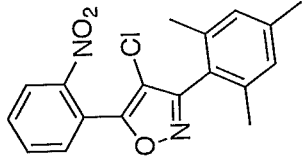

13f

Current Data Parameters  
NAME MLM-I-020  
EXPNO 6  
PROCNO 1  
DU /m  
USER melissa

F2 - Acquisition Parameters  
Date\_ 20100828  
Time 12.06  
INSTRUM DEX400  
PROBHD 5 mm BBO BB-1H  
PULPROG zg30  
TD 32768  
SOLVENT CDCl3  
NS 32  
DS 2  
SWH 6410.256 Hz  
FIDRES 0.195625 Hz  
AQ 2.5539540 sec  
RG 406.4  
RW 78.000 usec  
DE 6.00 usec  
TE 298.2 K  
D1 2.0000000 sec  
TD0 1

===== CHANNEL f1 =====  
NUC1 1H  
P1 13.50 usec  
PL 3.00 dB  
SFO1 400.2478017 MHz

F2 - Processing parameters  
SI 65536  
SF 400.2450000 MHz  
WDW no  
SSB 0  
LB 0  
GB 0  
PC 1.00

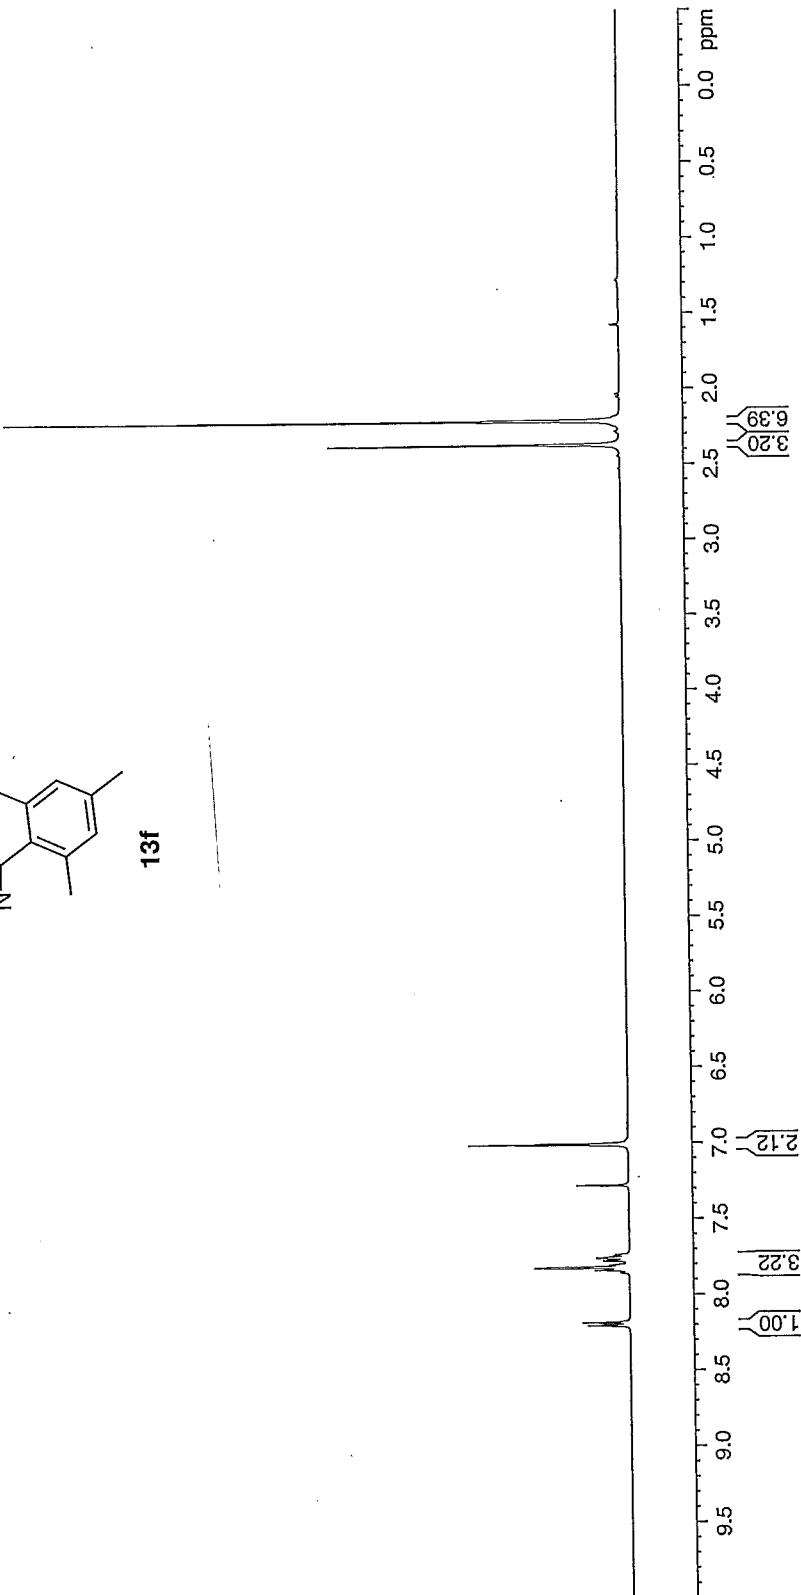

Current Data Parameters  
NAME MMN-I-020  
EXPNO 7  
PROCNO 1  
DT /m  
DI melissa  
F2 - Acquisition Parameters  
Date\_ 20100828  
Time 12.14  
INSTRUM DPX400  
PROBHD 5 mm BBO BB-1H  
PULPROG zgpg30  
TD 65536  
SOLVENT CDCl3  
NS 3820  
DS 4  
SWH 23980.814 Hz  
FIDRES 0.365918 Hz  
AQ 1.3684756 sec  
RG 14596.5  
RG 20.850 usec  
DE 6.00 usec  
TE 299.2 K  
D1 0.20000000 sec  
d11 0.03000000 sec  
DELTA 0.10000000 sec  
TD0 1  
===== CHANNEL f1 =====  
NUC1 13C  
P1 8.30 usec  
PL1 -3.00 dB  
SFO1 100.6517495 MHz  
===== CHANNEL f2 =====  
CPDPRG2 waltz16  
NUC2 1H  
PCPD2 90.00 usec  
PL2 -3.00 dB  
PL12 15.00 dB  
PL13 15.00 dB  
SFO2 400.2466010 MHz  
F2 - Processing parameters  
SI 65536  
SF 100.6416850 MHz  
WDW no  
SSB 0  
LB 0.00 Hz  
GB 0  
PC 1.40

21.27  
19.79

77.35  
77.23  
77.03  
76.71

161.67  
161.53  
148.19  
139.85  
137.77  
133.36  
131.76  
131.59  
128.41  
125.30  
122.71  
121.05  
109.63

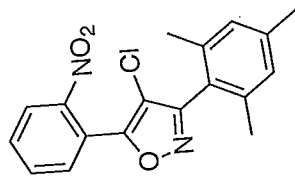

13f

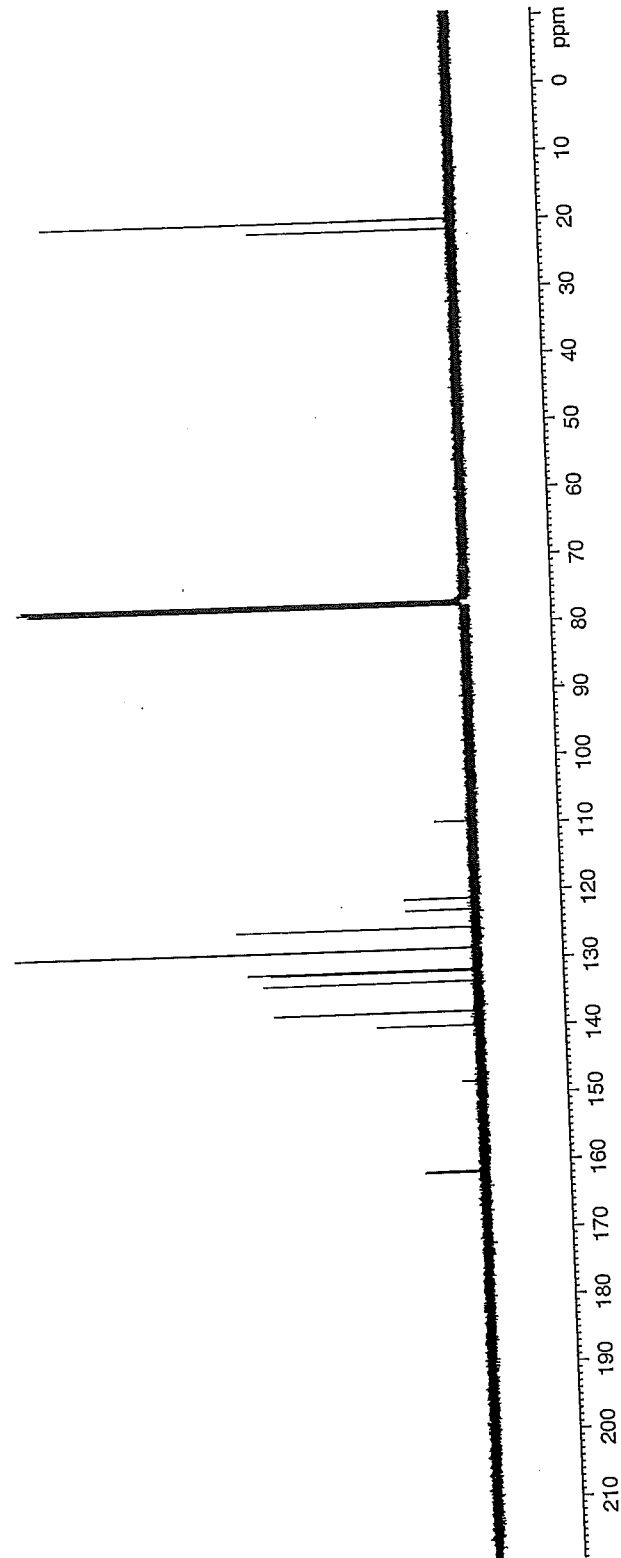

insoluble wht solid

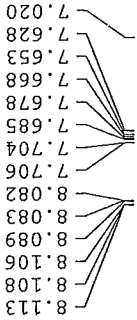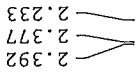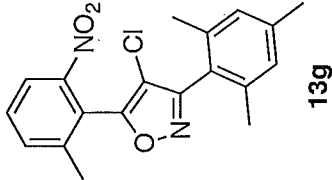

Current Data Parameters  
NAME MRN9035  
EXPNO 22  
PROCNO 1  
DU /n  
USER michaeln

F2 - Acquisition Parameters  
Date\_ 20090311  
Time 13.24  
INSTRUM DFX300  
PROBHD 5 mm QNP 1H/1  
PULPROG zg30  
TD 32768  
SOLVENT CDCl3  
NS 11  
DS 2  
SWH 4789.272 Hz  
FIDRES 0.146157 Hz  
AQ 3.4210291 sec  
RG 203.2  
DW 104.400 usec  
DE 6.00 usec  
TE 298.2 K  
D1 2.0000000 sec  
TD0 1

===== CHANNEL f1 =====  
NUC1 1H  
P1 9.00 usec  
PL -3.00 dB  
PL1 300.1321009 MHz  
SF01 300.1321009 MHz

F2 - Processing parameters  
SI 32768  
SF 300.1300000 MHz  
WDW no  
SSB 0  
LB 0.00 Hz  
GB 0  
PC 1.00

insoluable wht solid

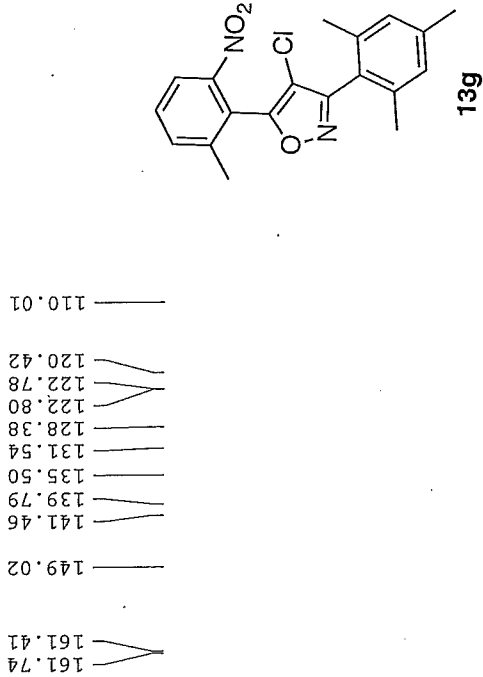

Current Data Parameters  
NAME MN9095  
EXPNO 23  
PROCNO 1  
DO /n  
USER michaeln

F2 - Acquisition Parameters  
Date\_ 20090311  
Time 13.29  
INSTRUM DFX300  
PROBHD 5 mm QNP 1H/1  
PULPROG zgpg30  
TD 65536  
SOLVENT CDCl3  
NS 475  
DS 4  
SWH 18832.393 Hz  
FIDRES 0.287360 Hz  
AQ 1.7400308 sec  
RG 812.7  
DM 26.550 usec  
DE 6.00 usec  
TE 298.2 K  
D1 0.15000001 sec  
d11 0.03000000 sec  
DELTA 0.05000000 sec  
TD0 1

===== CHANNEL f1 =====  
NUC1 13C  
P1 8.80 usec  
PL1 -3.00 dB  
SFO1 75.4760505 MHz

===== CHANNEL f2 =====  
CPDPRG2 waltz16  
NUC2 1H  
PCPD2 80.00 usec  
PL2 -3.00 dB  
PL12 17.55 dB  
PL13 17.55 dB  
SFO2 300.1312005 MHz

F2 - Processing parameters  
SI 32768  
SF 75.4677490 MHz  
WDW EM  
SSB 0  
LB 3.00 Hz  
GB 0  
PC 1.40

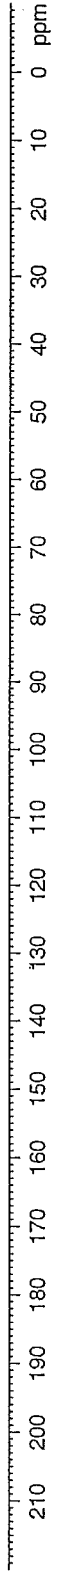

Current Data Parameters  
NAME MLM-I-018  
EXPNO 8  
PROCNO 1

F2 - Acquisition Parameter:  
Date\_ 20100708  
Time 12.36  
INSTRUM DPX400  
PROBHD 5 mm BBO BB-1H  
PULPROG zg30  
TD 32768  
SOLVENT CDCl3  
NS 27  
DS 2  
SWH 6410.256 Hz  
FIDRES 0.195625 Hz  
AQ 2.5559540 sec  
RG 812.7  
DW 78.000 usec  
DE 6.00 usec  
TE 298.2 K  
D1 2.00000000 sec  
TD0 1

===== CHANNEL f1 =====  
NUC1 1H  
P1 13.50 usec  
PL1 -3.00 dB  
SFO1 400.2478017 MHz

F2 - Processing parameters  
SI 65536  
SF 400.2450000 MHz  
WDW EM  
SSB 0  
LB 0.30 Hz  
GB 0  
PC 1.00

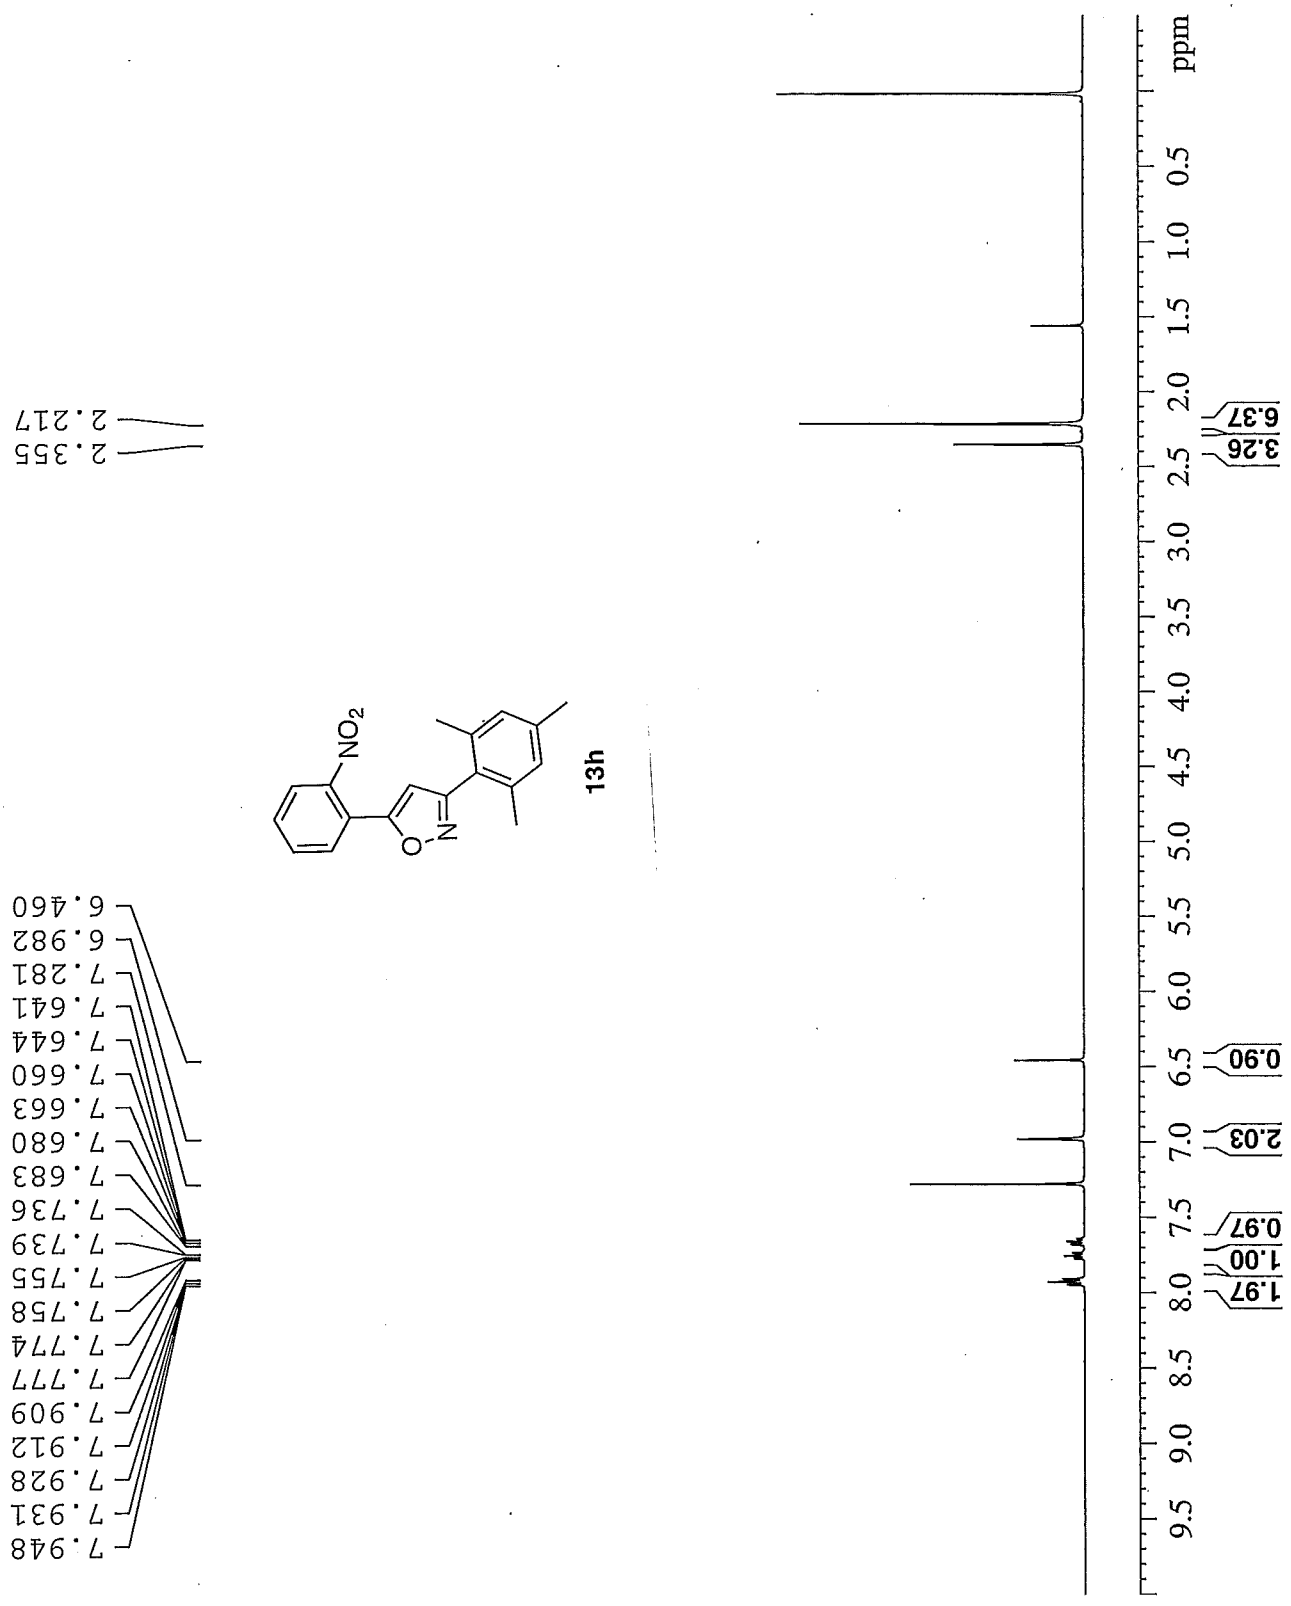

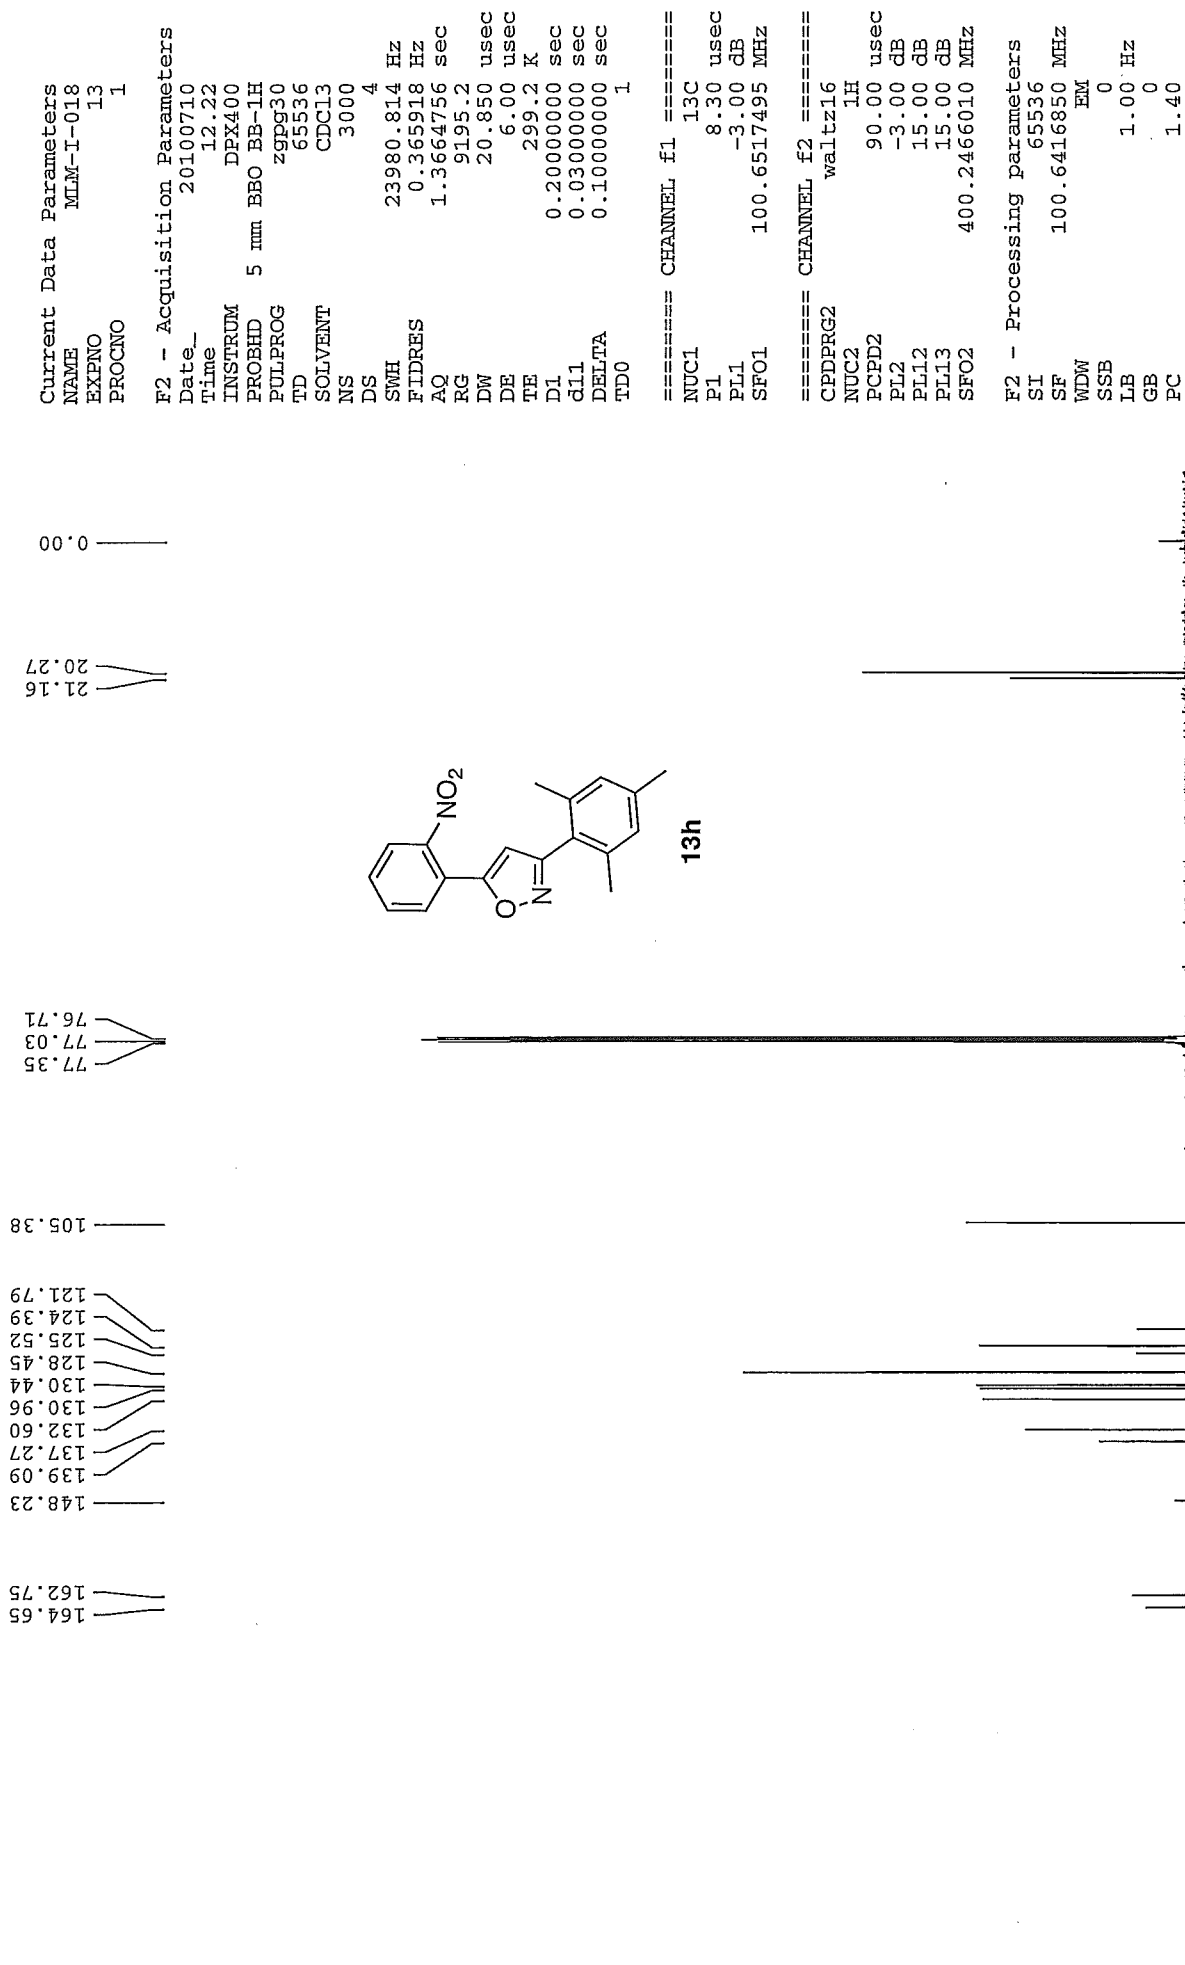

Current Data Parameters  
NAME MEN10014  
EXNO 10  
PROCNO 1  
DU /h  
USER michaeln  
F2 - Acquisition Parameters  
Date\_ 20090429  
Time 10.11  
INSTRUM DPX300  
PROBHD 5 mm QNP 1H/1  
PULPROG zg30  
TD 32768  
SOLVENT CDCl3  
NS 11  
DS 2  
SWH 4789.272 Hz  
FIDRES 0.146157 Hz  
AQ 3.4210291 sec  
RG 64  
DW 104.400 usec  
DE 6.00 usec  
TE 298.2 K  
D1 2.0000000 sec  
TD0 1  
===== CHANNEL f1 =====  
NUC1 1H  
P1 9.00 usec  
PL1 -3.00 dB  
SFO1 300.1321009 MHz  
F2 - Processing Parameters  
SI 32768  
SF 300.1300000 MHz  
WDW no  
SSB 0  
LB 0.00 Hz  
GB 0  
PC 1.00

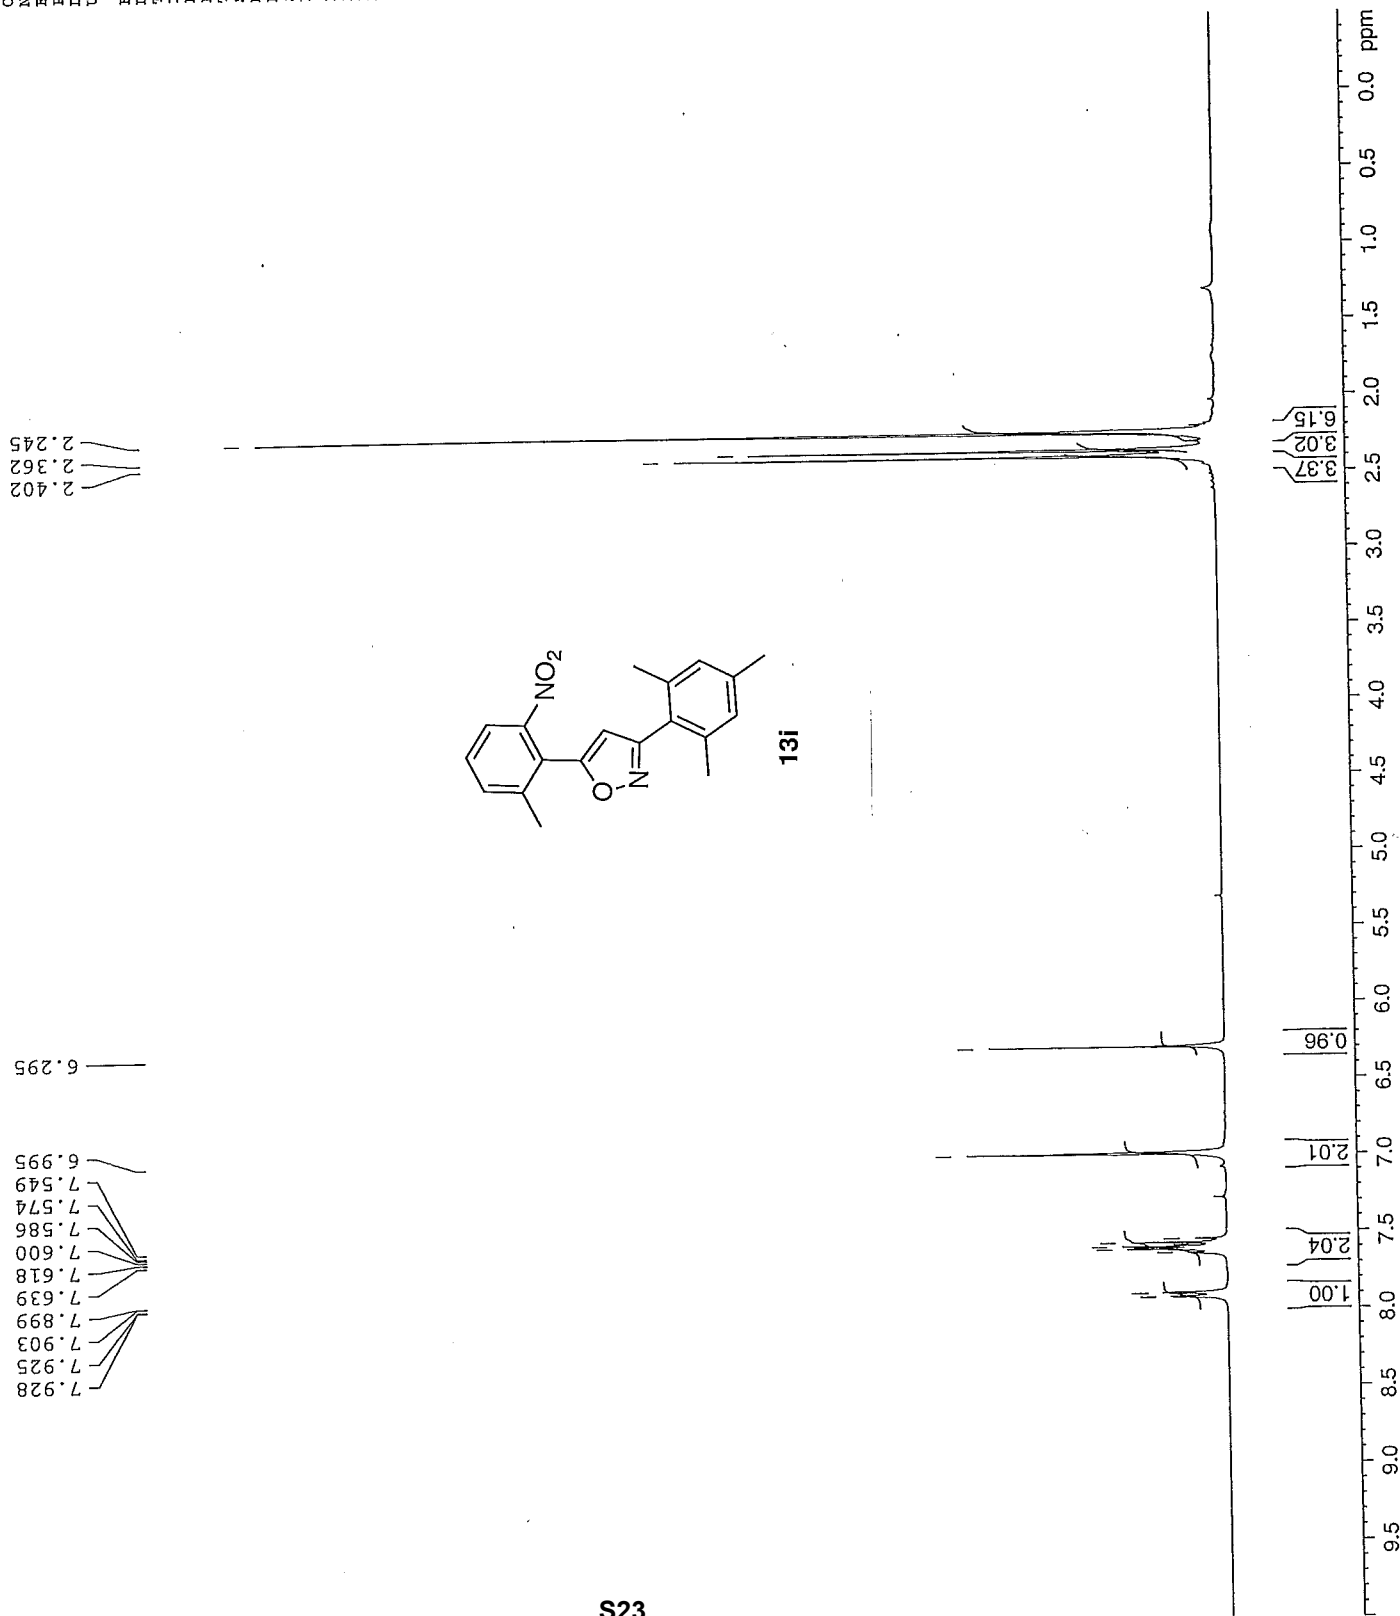

Current Data Parameters  
NAME KEN10014  
EXPNO 12  
PROCNO 1  
DU /h  
USER michaeln

F2 - Acquisition Parameters  
Date\_ 20090429  
Time 10.26  
INSTRUM DEX300  
PROBHD 5 mm QNP 1H/1  
PULPROG zgpg30  
TD 65536  
SOLVENT CDCl3  
NS 186  
DS 4  
SWH 18832.393 Hz  
FIDRES 0.287360 Hz  
AQ 1.7400308 sec  
RG 645.1  
DM 26.550 usec  
DE 6.00 usec  
TE 298.2 K  
TD0 1  
D1 0.15000001 sec  
d11 0.03000000 sec  
DELTA 0.05000000 sec  
TD0 1

===== CHANNEL f1 =====  
NUC1 13C  
P1 8.80 usec  
PL1 -3.00 dB  
SFO1 75.4760505 MHz

===== CHANNEL f2 =====  
CPDPRG2 waltz16  
NUC2 1H  
PCPD2 80.00 usec  
PL2 -3.00 dB  
PL12 17.55 dB  
PL13 17.55 dB  
SFO2 300.1312005 MHz

F2 - Processing parameters  
SI 32768  
SF 75.4677490 MHz  
TM 0  
WDW 0  
SSB 3.00 Hz  
LB 0  
GB 0  
PC 1.40

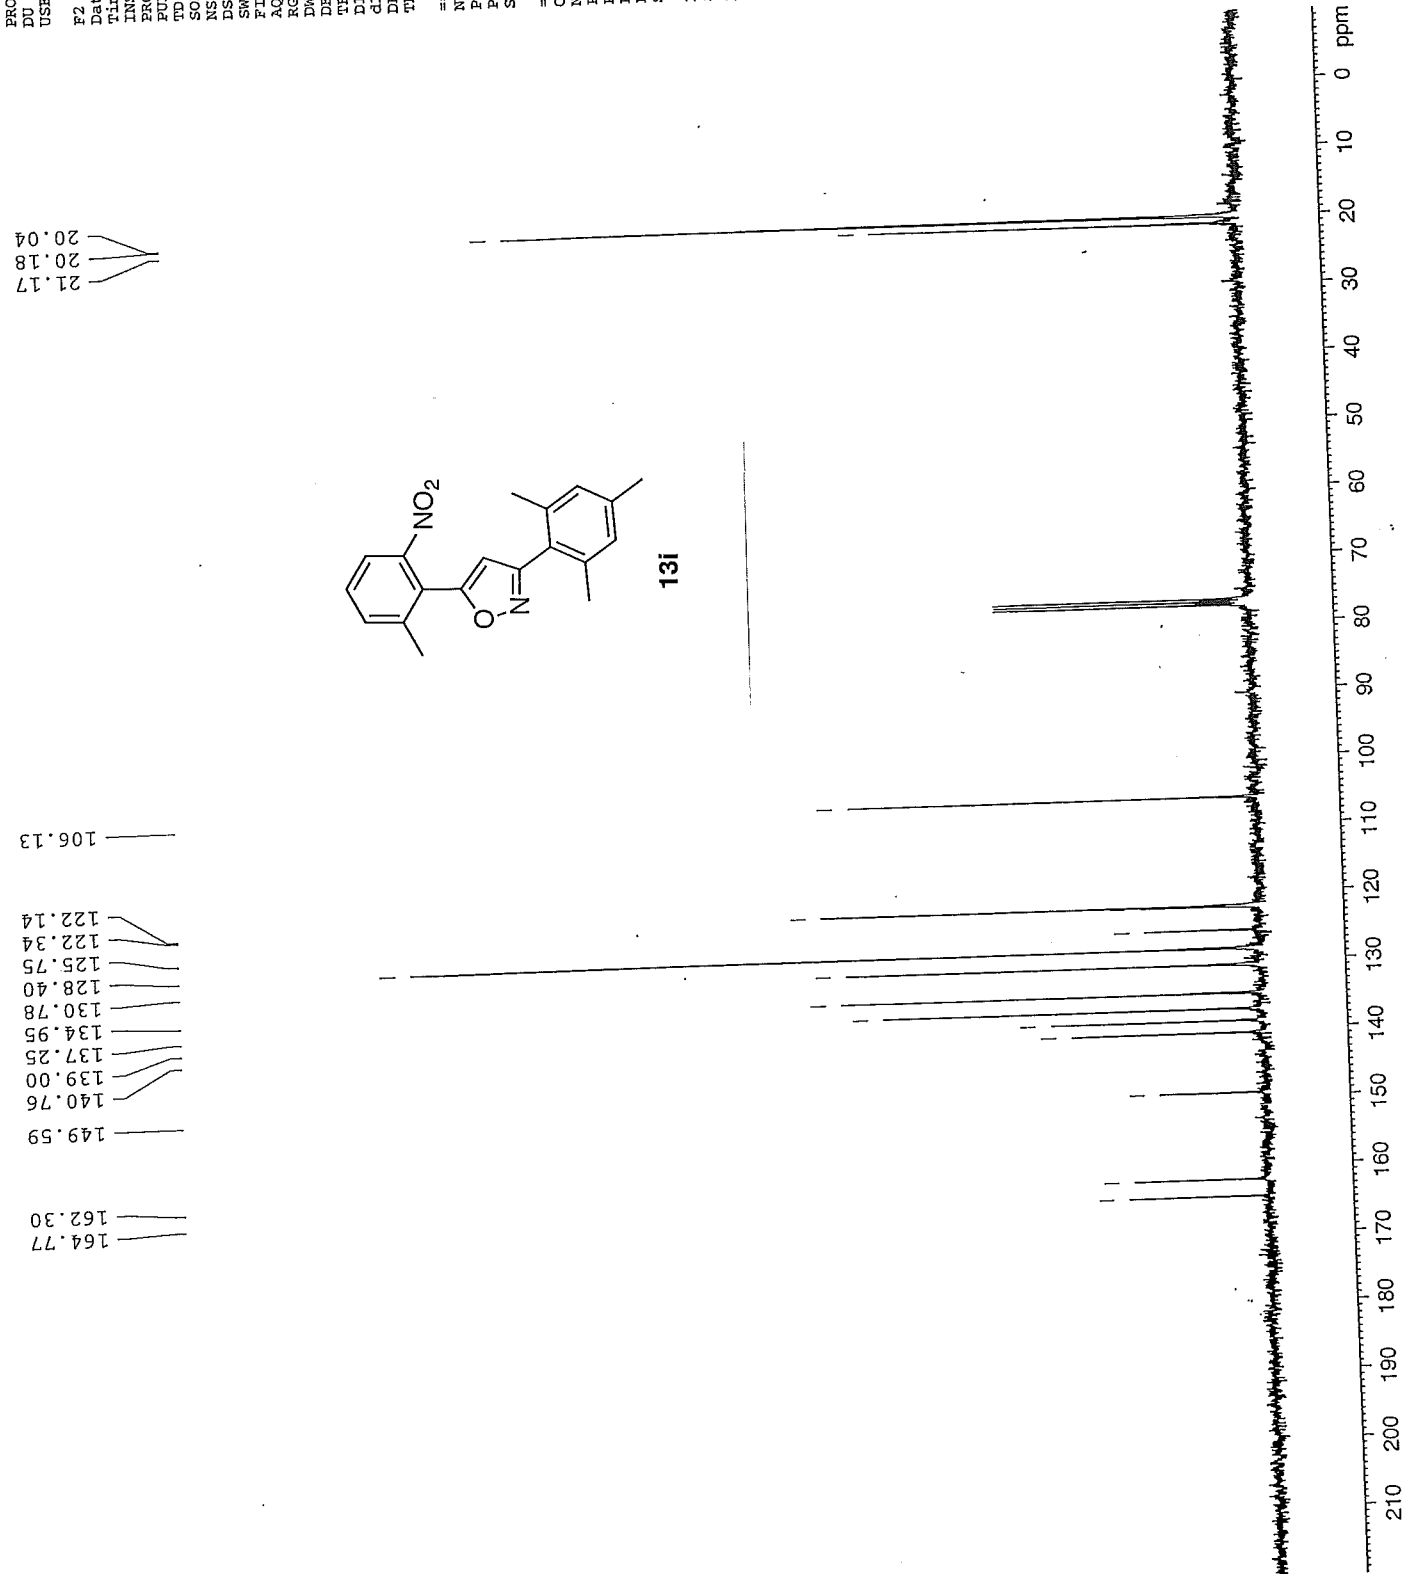



bismethyloxazole

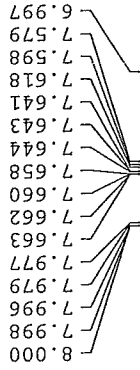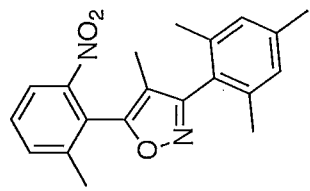

13j

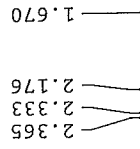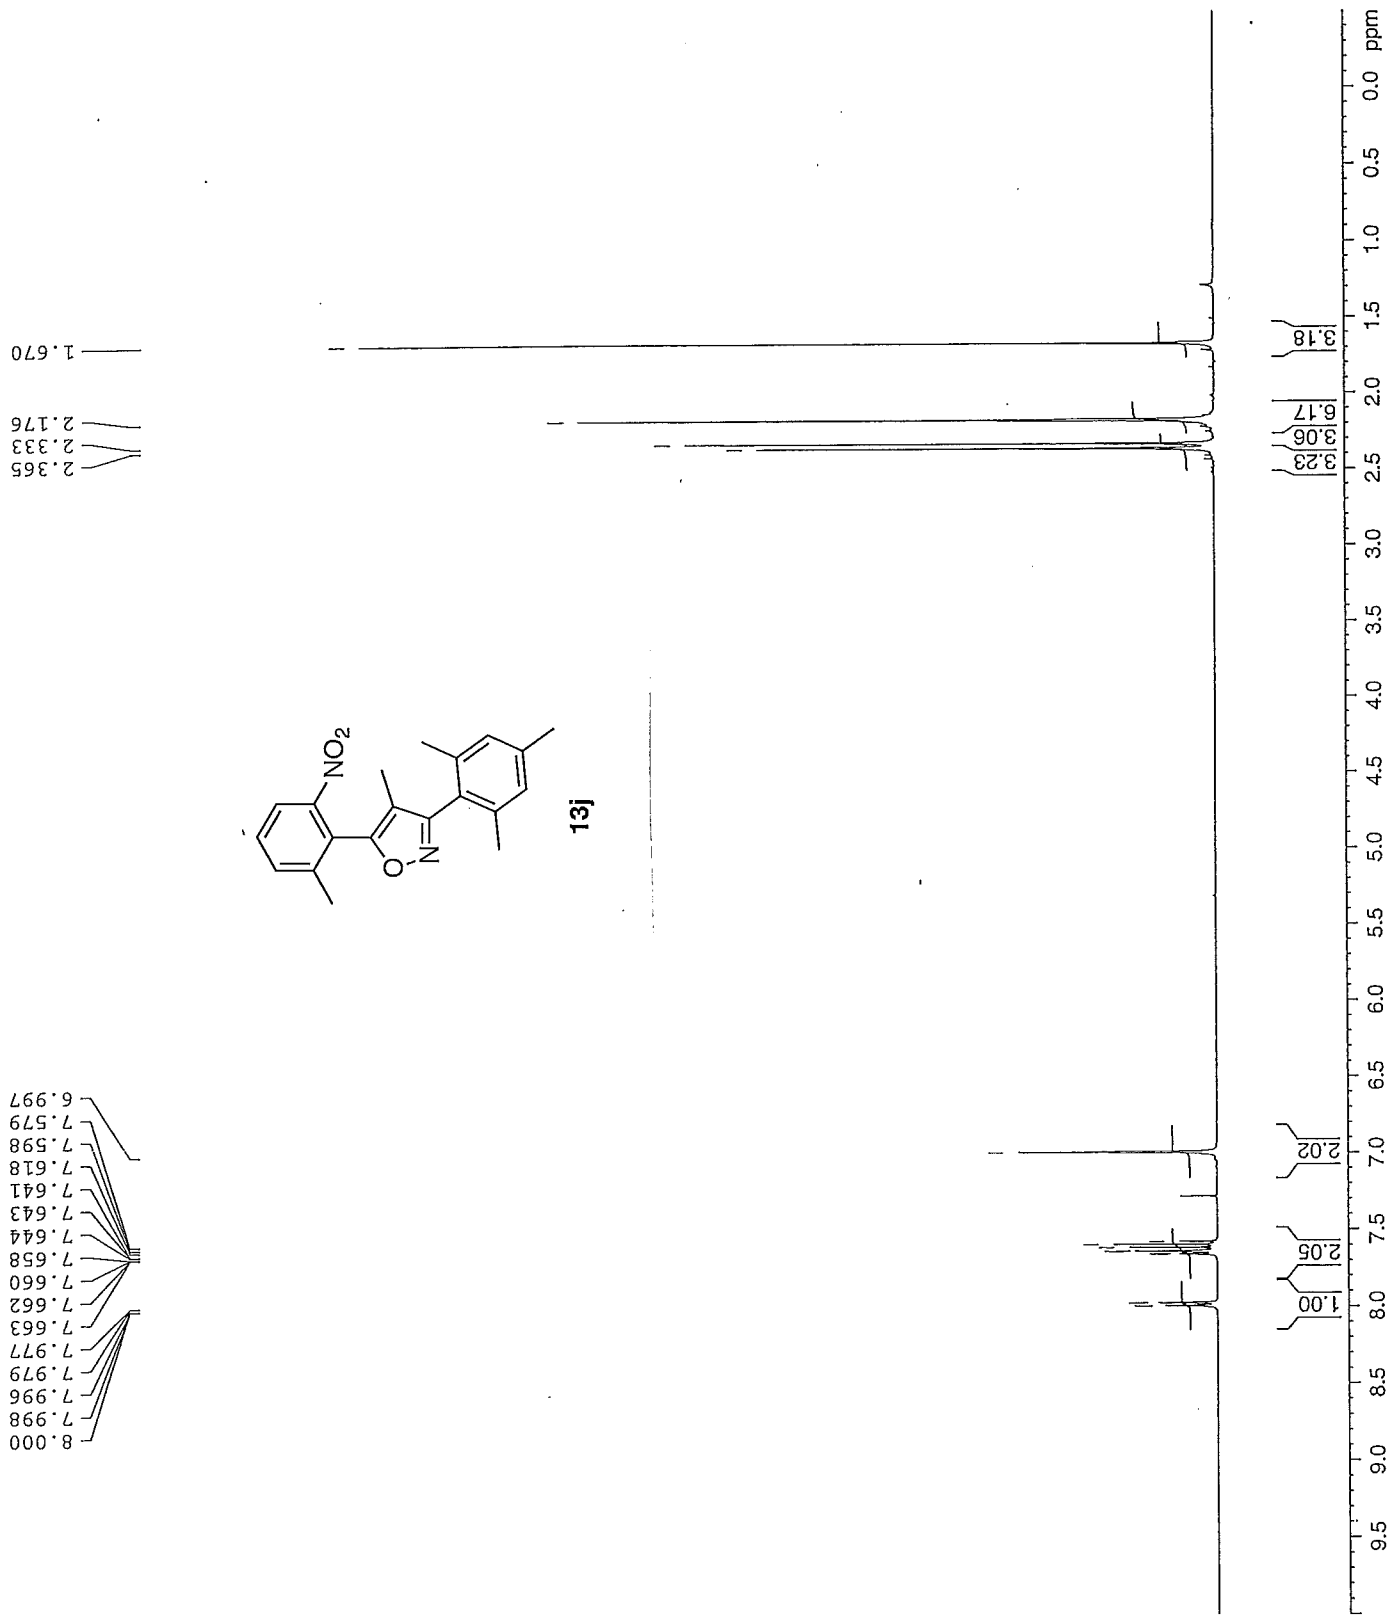

Current Data Parameters  
NAME MXN10049  
EXPNO 30  
PROCNO 1  
DU /m  
USER michaeln

F2 - Acquisition Parameters  
Date\_ 20090721  
Time 12.31  
INSTRUM DFX400  
PROBHD 5 mm BBO BB-1H  
PULPROG zg30  
TD 32768  
SOLVENT  
NS 12  
DS 2  
SWH 6410.256 Hz  
FIDRES 0.195625 Hz  
AQ 2.5559540 sec  
RG 114  
DW 78.000 usec  
DE 6.00 usec  
TE 299.2 K  
D1 2.00000000 sec  
TD0 1

===== CHANNEL f1 =====  
NUC1 1H  
P1 14.70 usec  
PL 0.00 dB  
SFO1 399.9528000 MHz

F2 - Processing parameters  
SI 32768  
SF 399.9500000 MHz  
WDW no  
SSB 0  
LB 0.00 Hz  
GB 0  
PC 1.00

bismethyloxazole

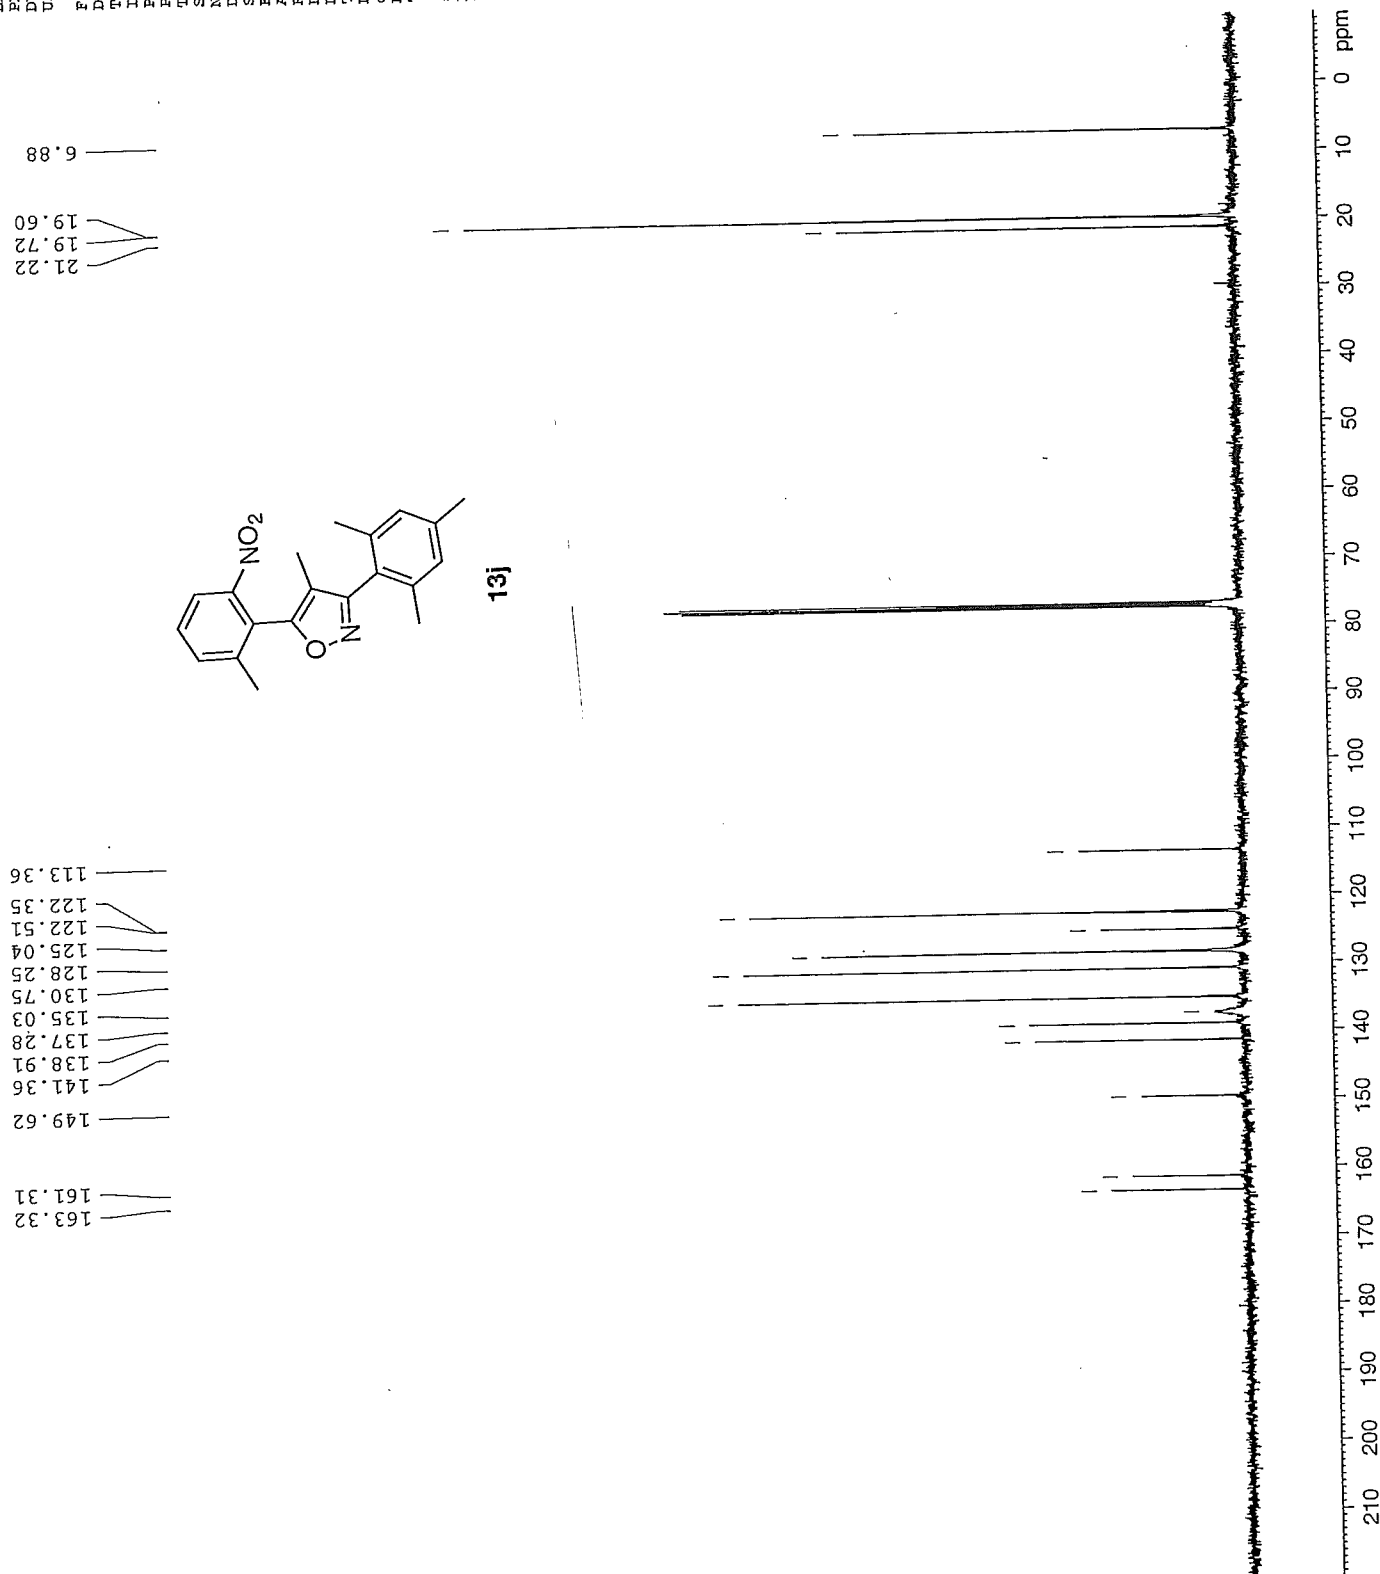

Current Data Parameters  
NAME MEN10049  
EXPNO 31  
PROCNO 1  
DU /m  
USER michaeln

F2 - Acquisition Parameters  
Date\_ 20090721  
Time 12.35  
INSTRUM DFX400  
PROBHD 5 mm BBO BB-IH  
PULPROG zgpg30  
TD 65536  
SOLVENT CDCl3  
NS 1112  
DS 4  
SWH 25125.629 Hz  
FIDRES 0.383387 Hz  
AQ 1.3042164 sec  
RG 16384  
DM 19.900 usec  
DE 6.00 usec  
TE 299.2 K  
D1 0.15000001 sec  
d11 0.03000000 sec  
DELTA 0.05000000 sec  
TDO 1

===== CHANNEL f1 =====  
NUC1 13C  
P1 7.80 usec  
PL1 -3.00 dB  
SFO1 100.5785700 MHz

===== CHANNEL f2 =====  
CPDPRG2 waltz16  
NUC2 1H  
PCPD2 135.00 usec  
PL2 17.40 dB  
PL12 17.40 dB  
PL13 17.40 dB  
SFO2 399.9516000 MHz

F2 - Processing parameters  
SI 32768  
SF 100.5675080 MHz  
WDW EM  
SSB 0  
LB 3.00 Hz  
GB 0  
PC 1.40

NAME MLM-V-012  
EXPNO 7  
PROCNO 1  
Date\_ 20120906  
Time 15.30  
INSTRUM robinson  
PROBHD 5 mm PABBO BB-  
PULPROG zg30  
TD 32768  
SOLVENT CDC13  
NS 32  
DS 2  
SWH 7183.908 H  
FIDRES 0.219235 H  
AQ 2.2807028 s  
RG 128  
DW 69.600 u  
DE 6.50 u  
TE 298.2 K  
D1 2.00000000 s  
TD0 1  
===== CHANNEL f1 =====  
NUC1 1H  
P1 14.00 u  
PL1 0.00 d  
SFO1 400.1428010 M  
SI 32768  
SF 400.1400000 M  
WDW EM  
SSB 0  
LB 0.30 H  
GB 0  
PC 1.00

2.410  
2.368  
2.162  
1.796  
1.599

7.444  
7.425  
7.410  
7.407  
7.392  
7.389  
7.371  
7.354  
7.344  
7.325  
7.307  
7.283  
6.993

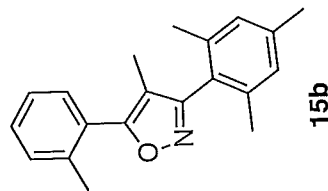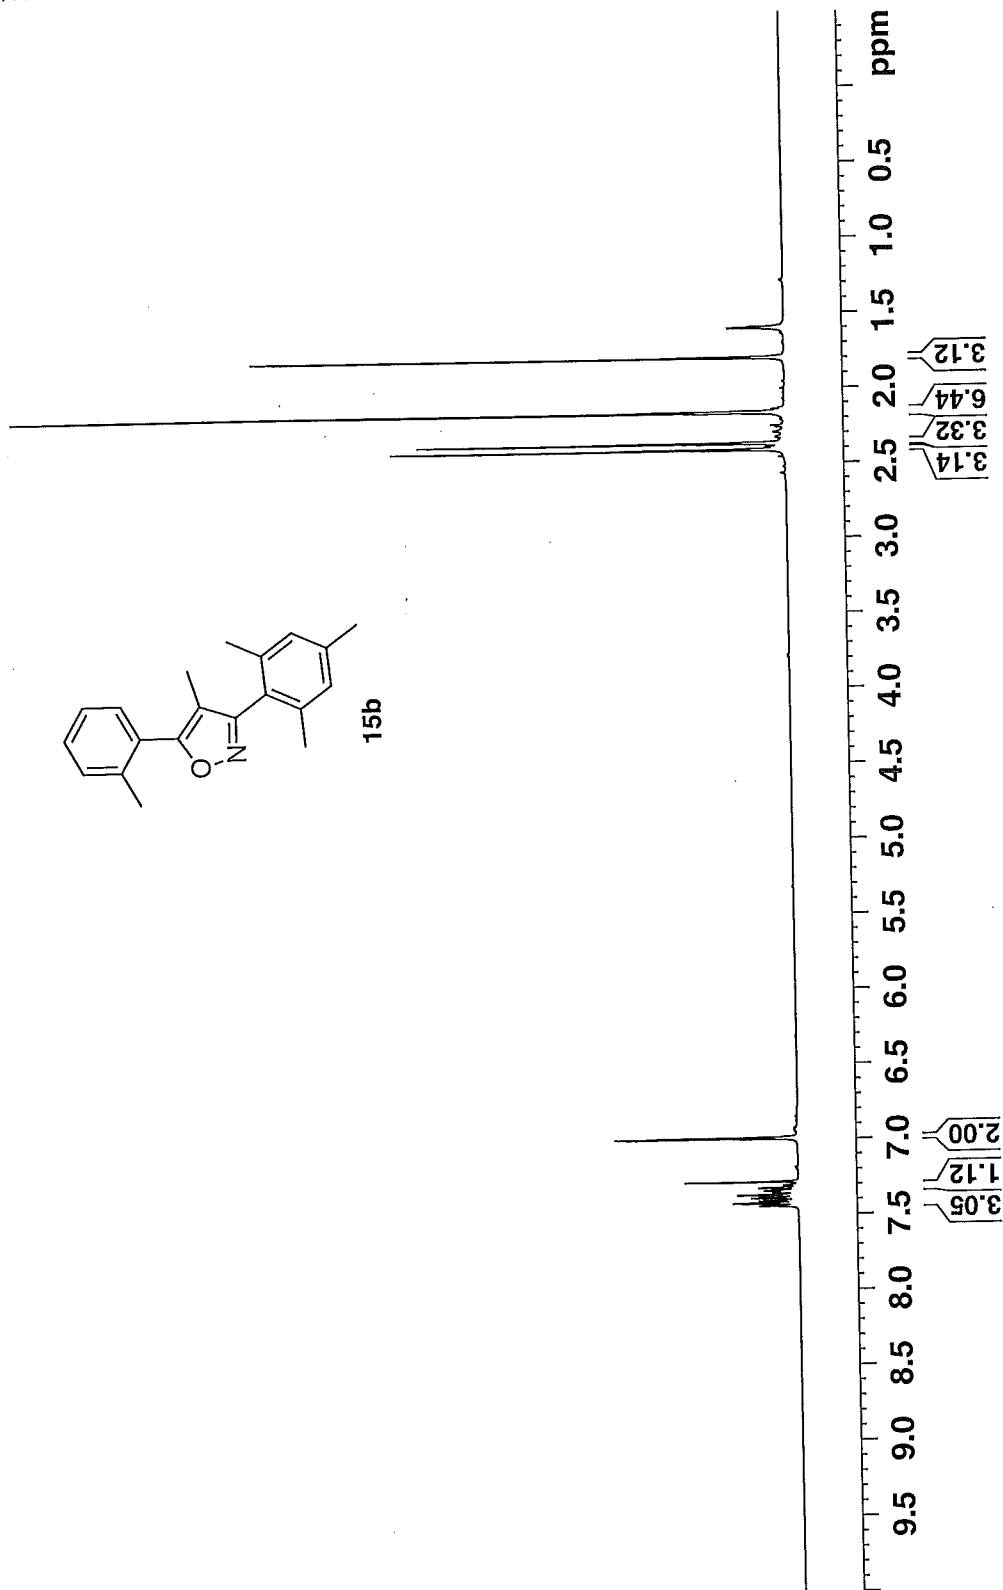

NAME MLM-V-012  
EXPNO 9  
PROCNO 1  
Date\_ 20120906  
Time 19.13  
INSTRUM robinson  
PROBHD 5 mm PABBO BB-  
PULPROG zgpg30  
TD 65536  
SOLVENT CDC13  
NS 412  
DS 4  
SWH 23980.814 H  
FIDRES 0.365918 H  
AQ 1.3664756 s  
RG 16384  
DW 20.850 u  
DE 6.50 u  
TE 298.9 K  
D1 1.00000000 s  
D11 0.03000000 s  
TD0 1  
===== CHANNEL f1 =====  
NUC1 13C  
P1 9.00 u  
PL1 -2.00 d  
SFO1 100.6253446 M  
===== CHANNEL f2 =====  
CPDPRG2 waltz16  
NUC2 1H  
PCPD2 90.00 u  
PL2 0.00 d  
PL12 16.16 d  
PL13 17.00 d  
SFO2 400.1416006 M  
SI 32768  
SF 100.6152830 M  
WDW EM  
SSB 0  
LB 3.00 H  
GB 0  
PC 1.40

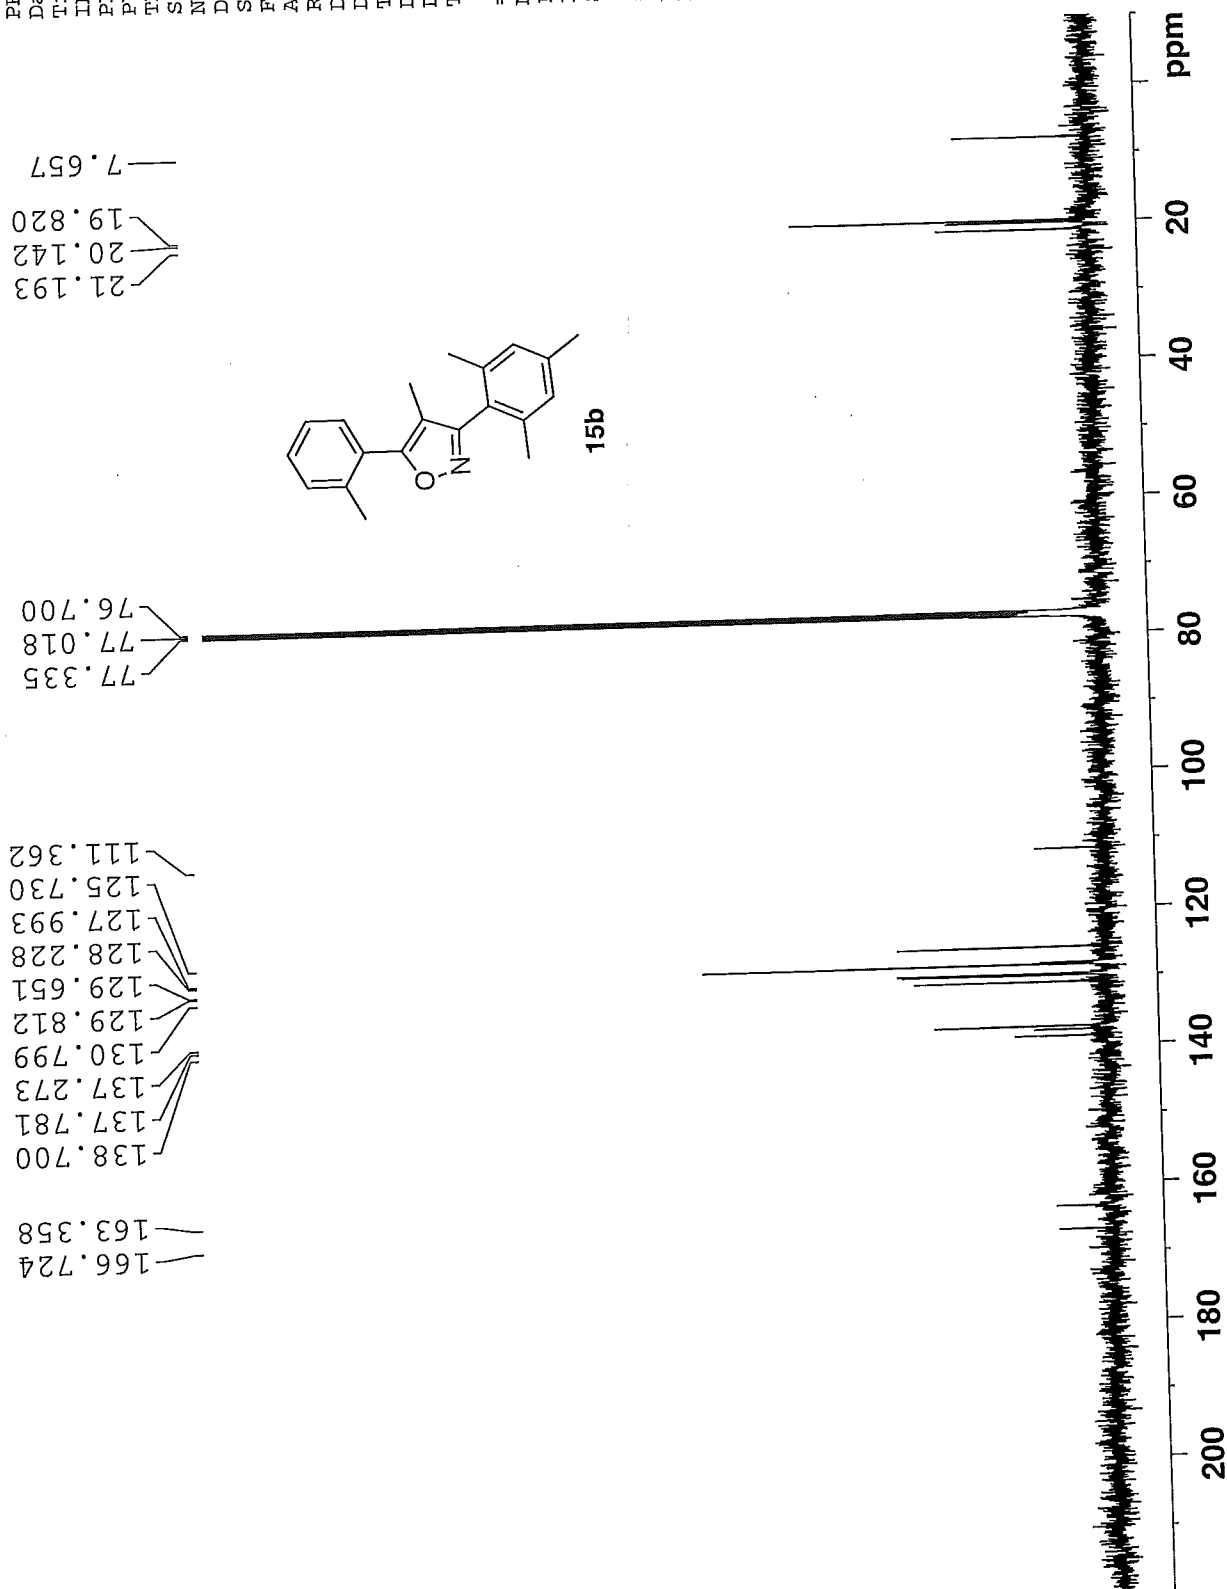

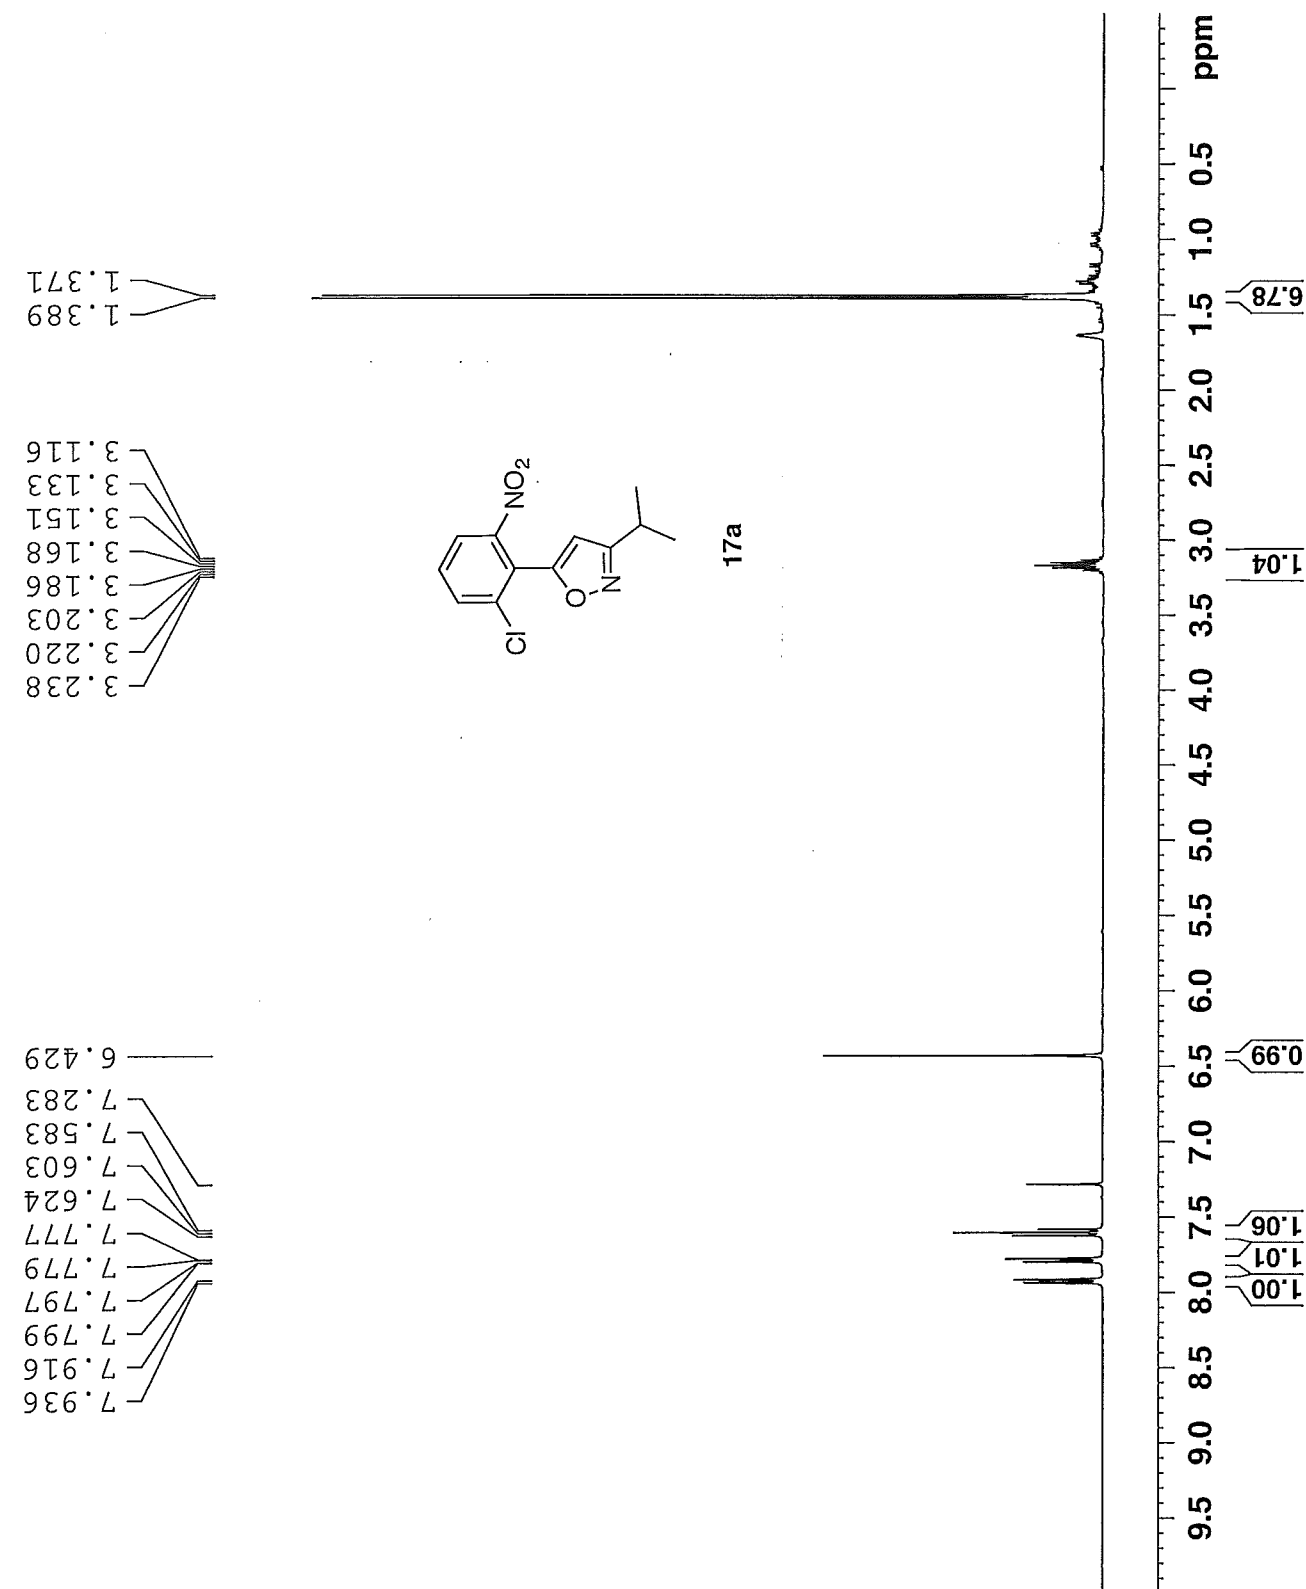

Current Data Parameters  
NAME MLM-V-022  
EXPNO 5  
PROCNO 1

F2 - Acquisition Parameters:  
Date\_ 20120905  
Time 10.44  
INSTRUM robinson  
PROBHD 5 mm PABBO BB-  
PULPROG zgpg30  
TD 65536  
SOLVENT CDCl3  
NS 98  
DS 0  
SWH 23980.814 Hz  
FIDRES 0.365918 Hz  
AQ 1.3664756 sec  
RG 32768  
DW 20.850 usec  
DE 6.50 usec  
TE 298.3 K  
D1 1.00000000 sec  
D11 0.03000000 sec  
TD0 1

===== CHANNEL f1 =====  
NUC1 13C  
P1 9.00 usec  
PL1 -2.00 dB  
SFO1 100.6253446 MHz

===== CHANNEL f2 =====  
CPDPRG2 waltz16  
NUC2 1H  
PCPD2 90.00 usec  
PL2 0.00 dB  
PL12 16.16 dB  
PL13 17.00 dB  
SFO2 400.1416006 MHz

F2 - Processing parameters  
SI 32768  
SF 100.6152830 MHz  
WDW EM  
SSB 0  
LB 3.00 Hz  
GB 0  
PC 1.40

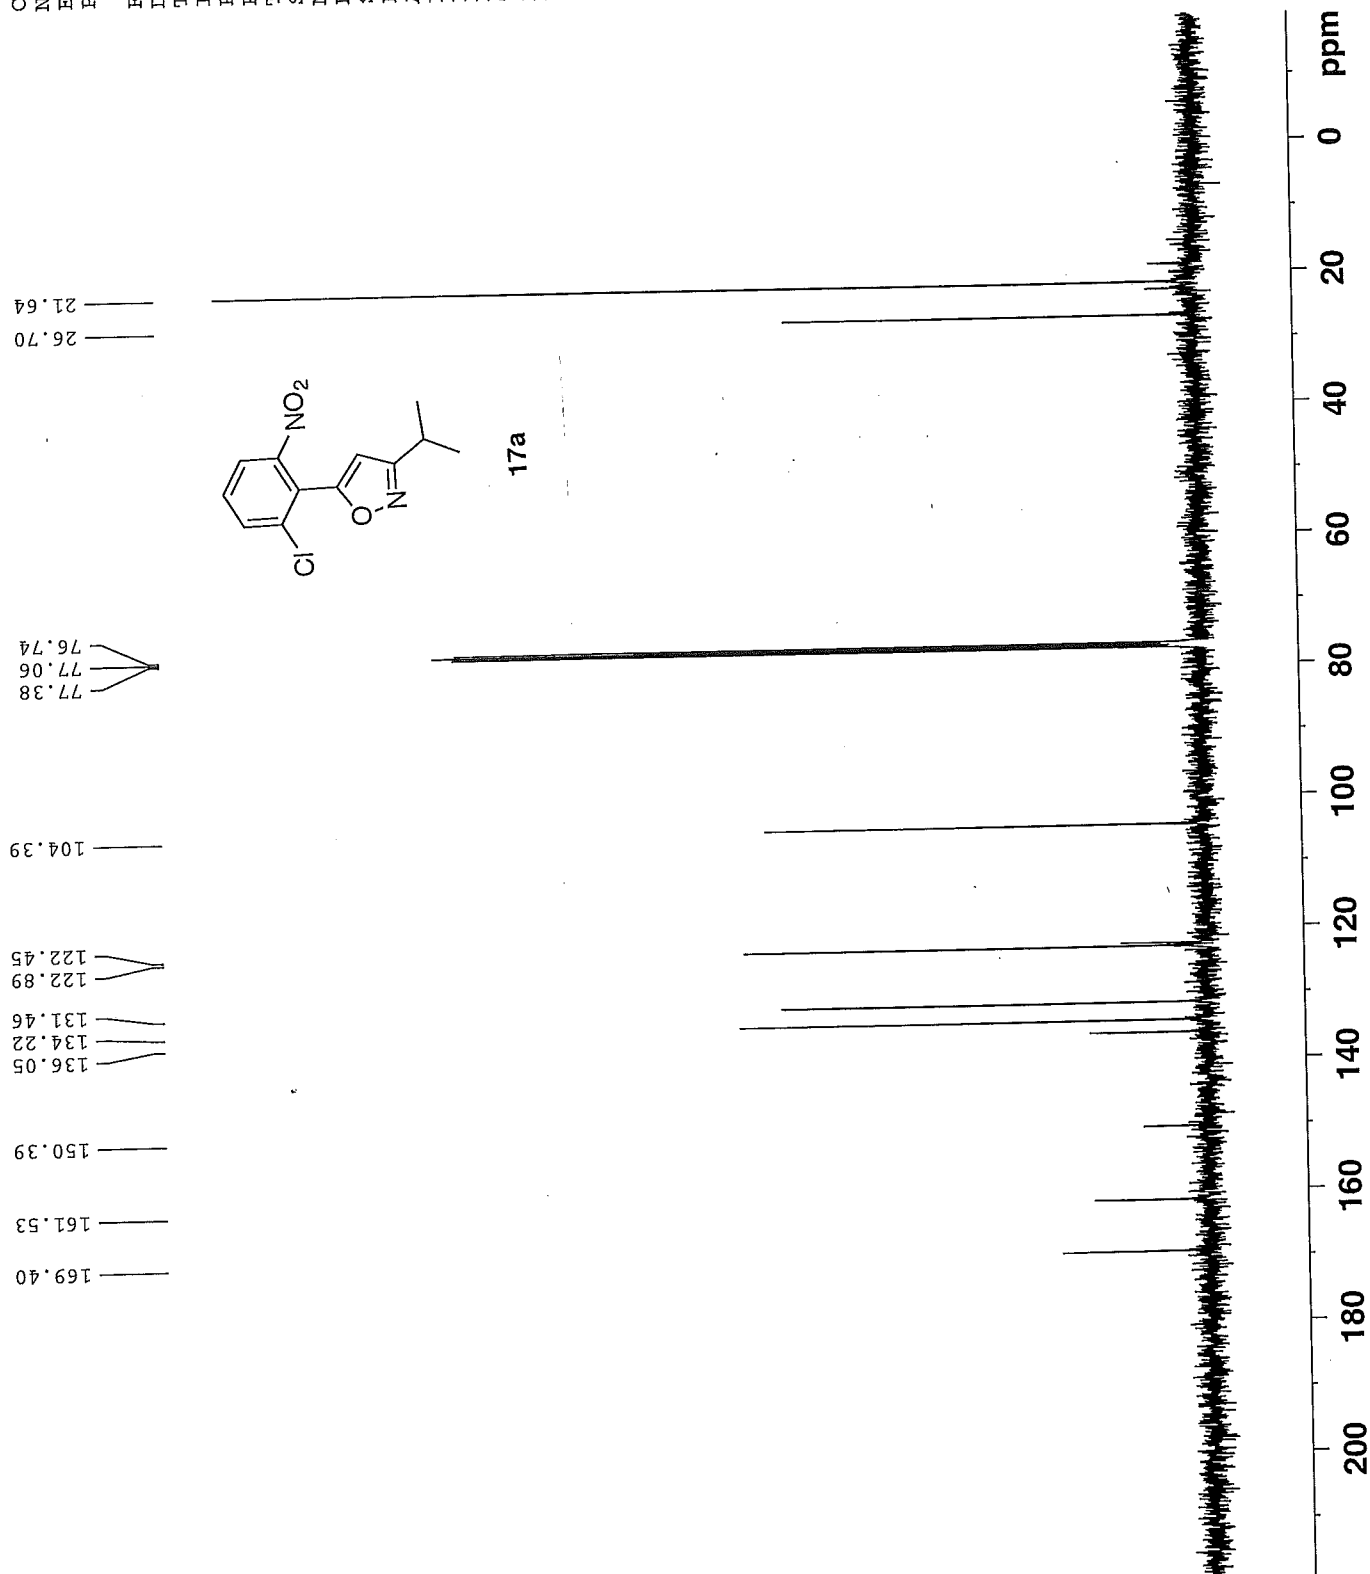

NAME MLM-V-023  
EXPNO 2  
PROCNO 1  
Date\_ 20120830  
Time 12.32  
INSTRUM robinson  
PROBHD 5 mm PABBO BB-  
PULPROG zg30  
TD 32768  
SOLVENT CDCl3  
NS 6  
DS 0  
SWH 7183.908 Hz  
FIDRES 0.219235 Hz  
AQ 2.2807028 s  
RG 161.3  
DW 69.600 us  
DE 6.50 us  
TE 298.2 K  
D1 2.00000000 s  
TD0 1  
===== CHANNEL f1 =====  
NUC1 1H  
P1 14.00 us  
PL1 0.00 dB  
SFO1 400.1428010 MHz  
SI 32768  
SF 400.1400000 MHz  
WDW EM  
SSB 0  
LB 0.30 Hz  
GB 0  
PC 1.00

2.787  
2.768  
2.749  
1.840  
1.821  
1.803  
1.784  
1.766  
1.747  
1.059  
1.041  
1.022

7.952  
7.949  
7.931  
7.928  
7.804  
7.801  
7.784  
7.781  
7.628  
7.608  
7.587  
7.282  
6.406

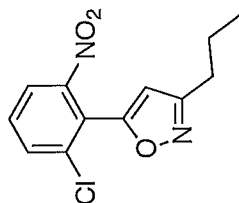

17b

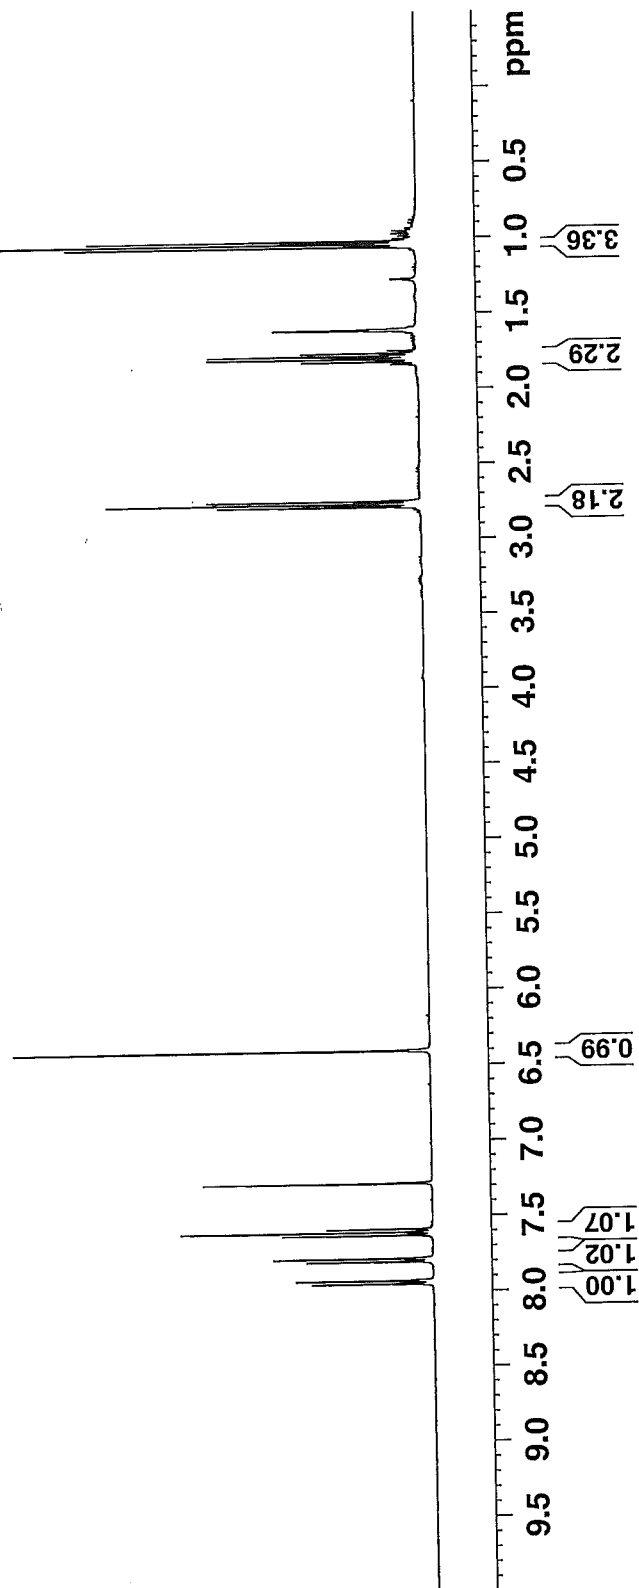

NAME MLM-V-023  
EXPNO 6  
PROCNO 1  
Date\_ 20120906  
Time 11.54  
INSTRUM robinson  
PROBHD 5 mm PABBO BB-  
PULPROG zgpg30  
TD 65536  
SOLVENT CDCl3  
NS 146  
DS 0  
SWH 23980.814 H  
FIDRES 0.365918 H  
AQ 1.3664756 s  
RG 32768  
DW 20.850 u  
DE 6.50 u  
TE 298.3 K  
D1 1.00000000 s  
D11 0.03000000 s  
TD0 1  
===== CHANNEL f1 =====  
NUC1 13C  
P1 9.00 u  
PL1 -2.00 d  
SFO1 100.6253446 M  
===== CHANNEL f2 =====  
CPDPRG2 waltz16  
NUC2 1H  
PCPD2 90.00 u  
PL2 0.00 d  
PL12 16.16 d  
PL13 17.00 d  
SFO2 400.1416006 M  
SI 32768  
SF 100.6152830 M  
WDW EM  
SSB 0  
LB 3.00 H  
GB 0  
PC 1.40

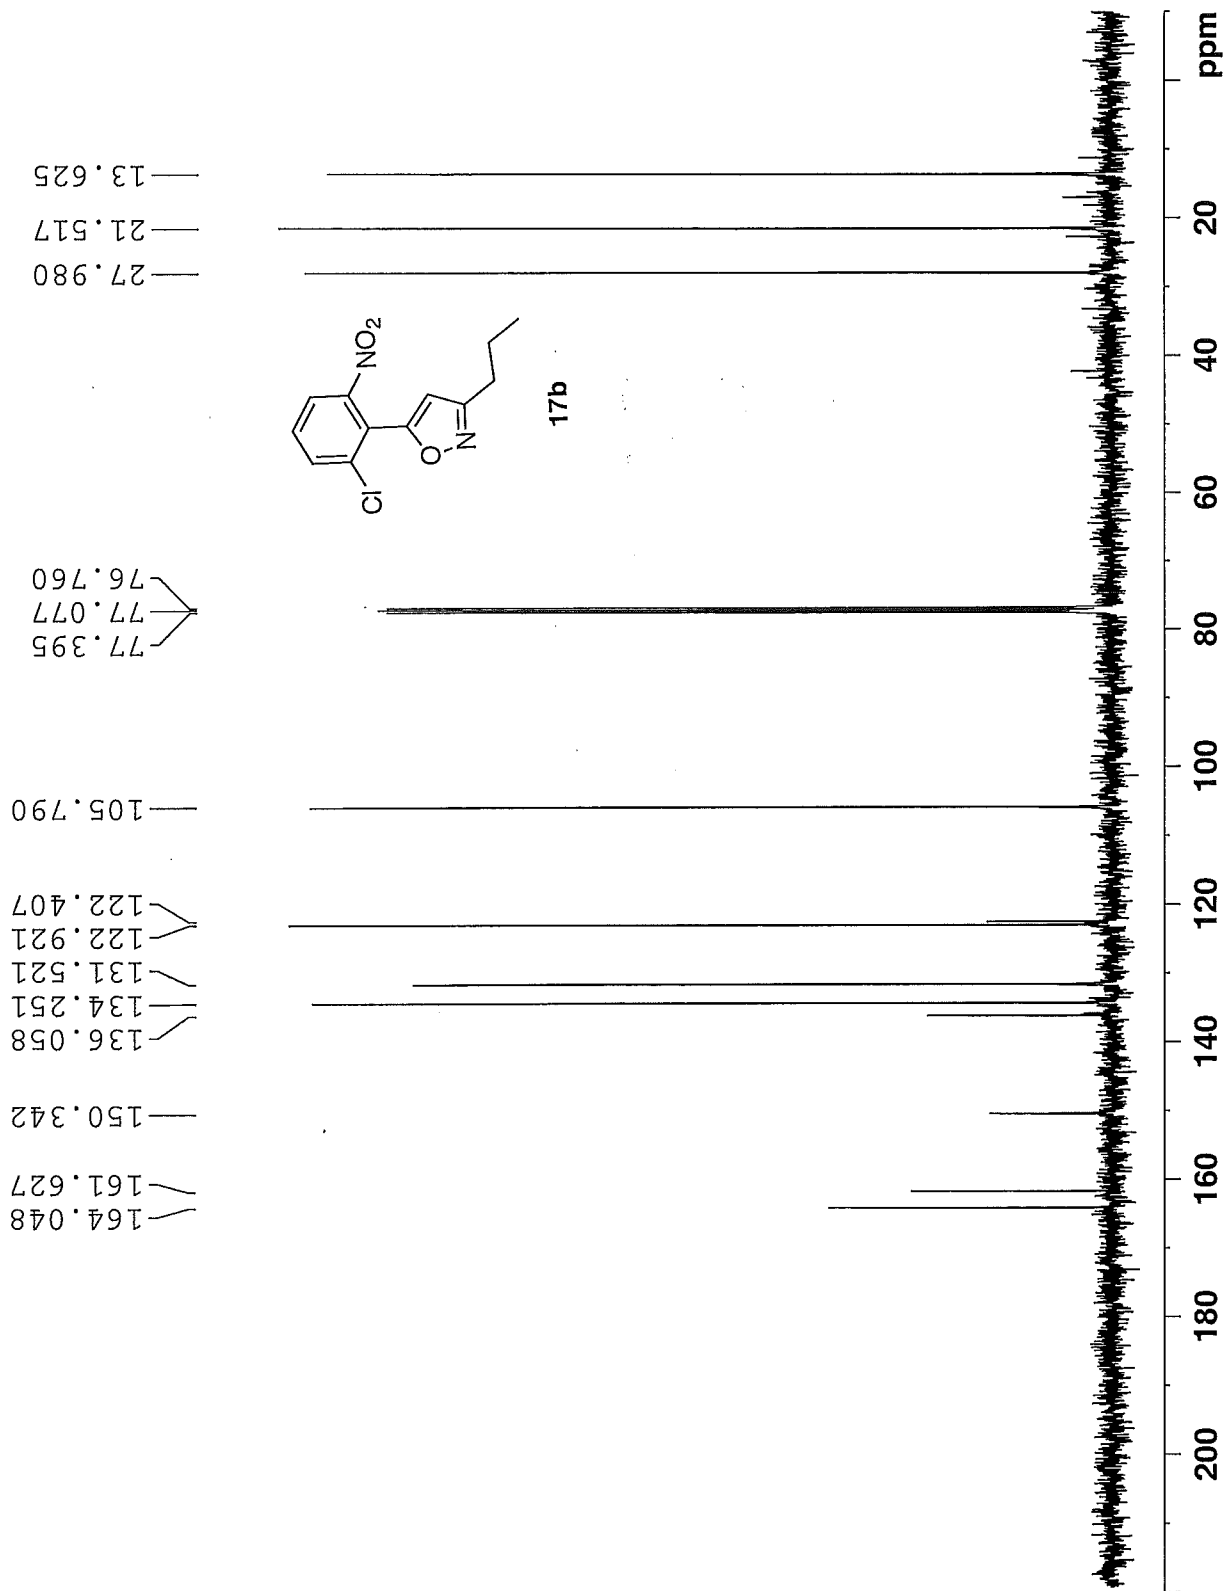



NAME MLM-V-025  
EXPNO 11  
PROCNO 1  
Date\_ 20120910  
Time 15.17  
INSTRUM robinson  
PROBHD 5 mm PABBO BB-  
PULPROG zg30  
TD 32768  
SOLVENT CDCl3  
NS 32  
DS 0  
SWH 7183.908 H  
FIDRES 0.219235 H  
AQ 2.2807028 s  
RG 90.5  
DM 69.600 u  
DE 6.50 u  
TE 298.2 K  
D1 2.0000000 s  
TD0 1  
===== CHANNEL f1 =====  
NUC1 1H  
P1 14.00 u  
PL1 0.00 d  
SFO1 400.1428010 M  
SI 32768  
SF 400.1400000 M  
WDW EM  
SSB 0  
LB 0.30 H  
GB 0  
PC 1.00

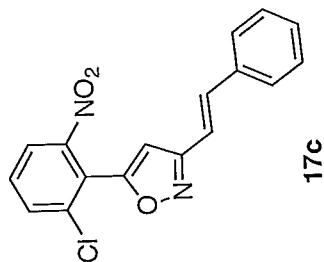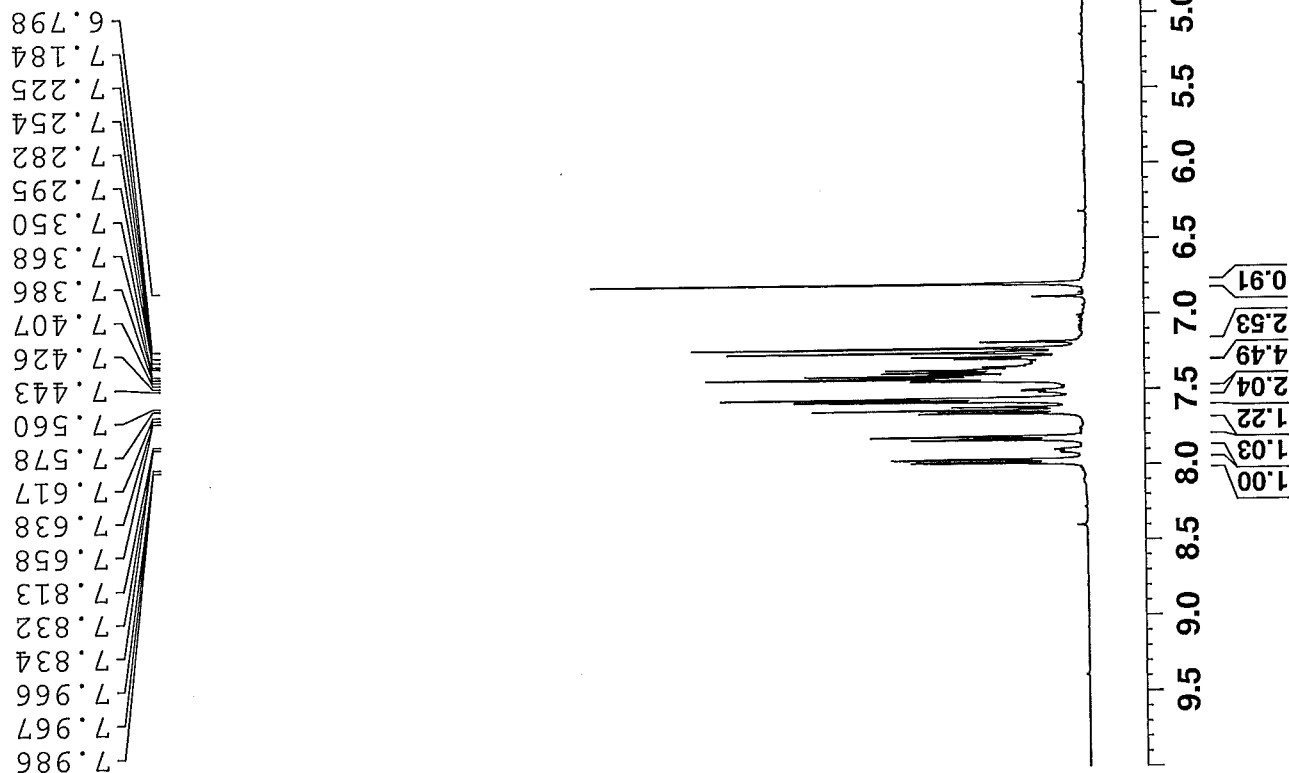

NAME MLM-V-025  
EXPNO 12  
PROCNO 1  
Date\_ 20120910  
Time 15.22  
INSTRUM robinson  
PROBHD 5 mm PABBO BB-  
PULPROG zgpg30  
TD 65536  
SOLVENT CDC13  
NS 327  
DS 4  
SWH 23980.814 H  
FIDRES 0.365918 H  
AQ 1.3664756 s  
RG 32768  
DW 20.850 u  
DE 6.50 u  
TE 299.3 K  
D1 1.00000000 s  
D11 0.03000000 s  
TD0 1  
===== CHANNEL f1 =====  
NUC1 13C  
P1 9.00 u  
PL1 -2.00 d  
SFO1 100.6253446 M  
===== CHANNEL f2 =====  
CPDPRG2 waltz16  
NUC2 1H  
PCPD2 90.00 u  
PL2 0.00 d  
PL12 16.16 d  
PL13 17.00 d  
SFO2 400.1416006 M  
SI 32768  
SF 100.6152830 M  
WDW EM  
SSB 0  
LB 3.00 H  
GB 0  
PC 1.40

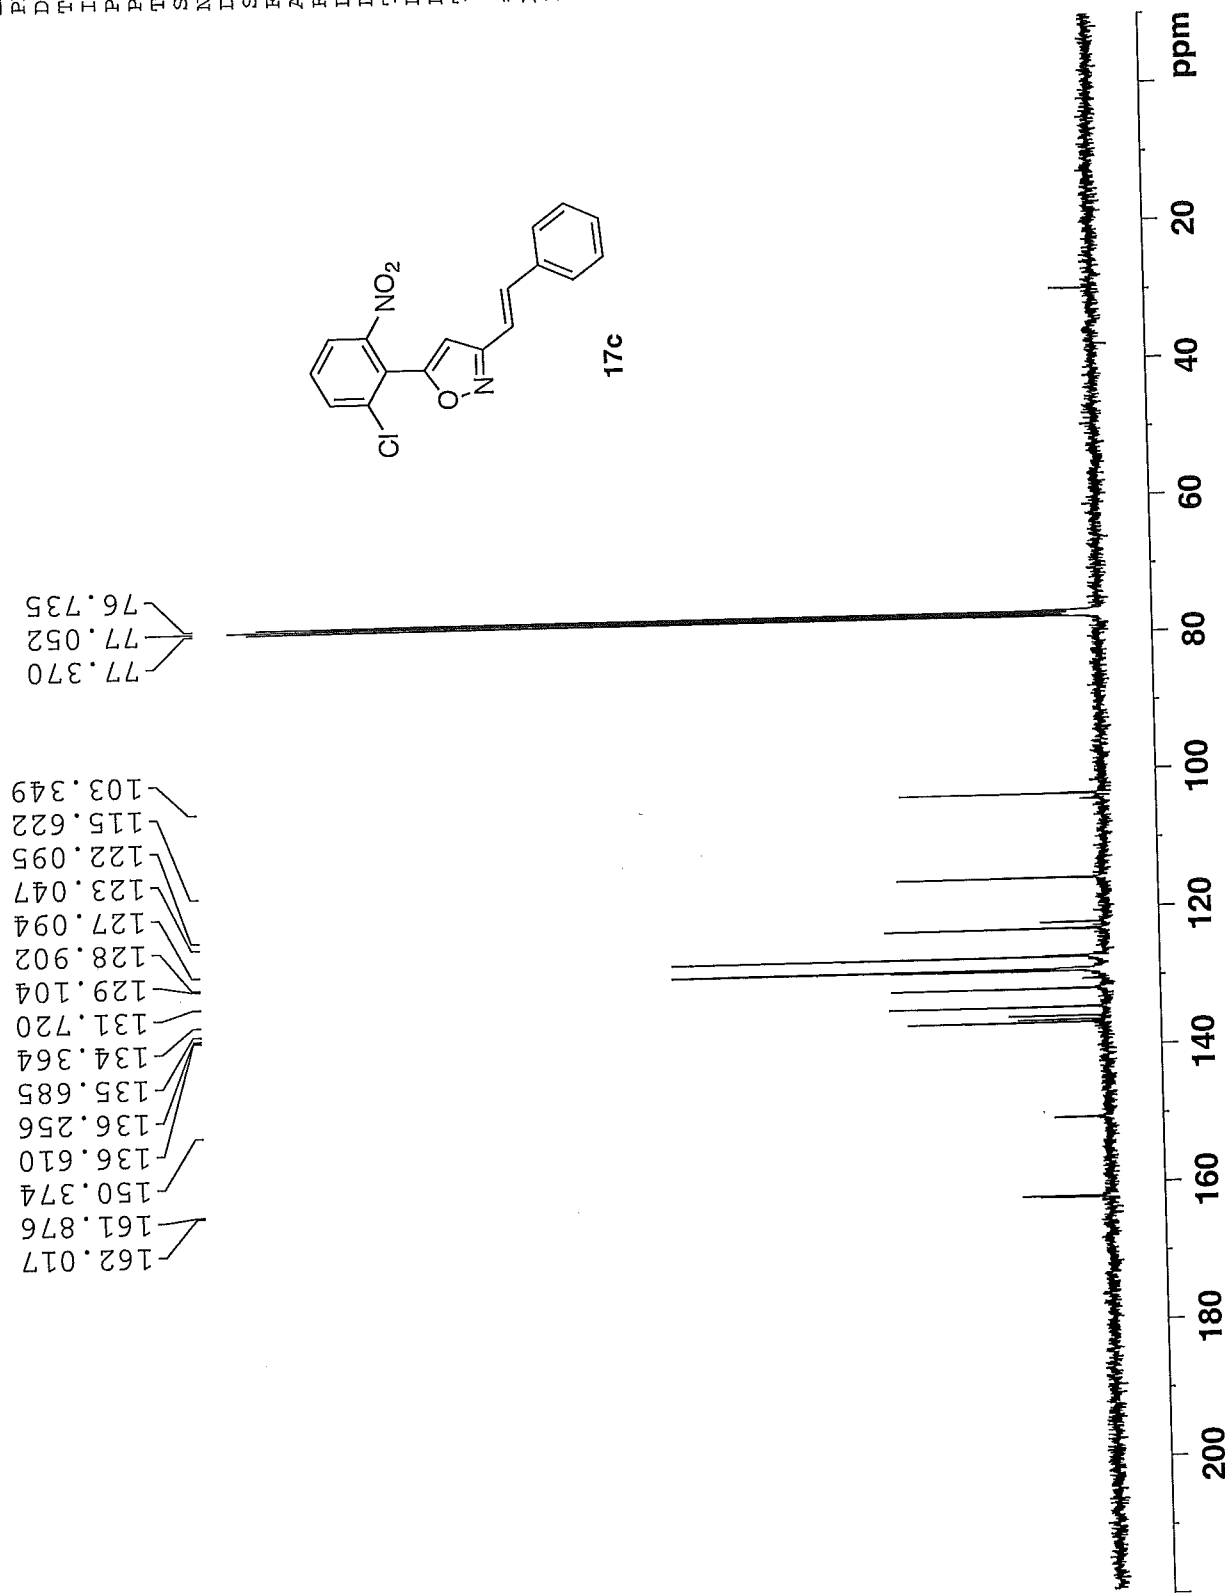

NAME MLM-IV-020  
EXPNO 6  
PROCNO 1  
Date\_ 20120329  
Time 18.00  
INSTRUM robinson  
PROBHD 5 mm PABBO BB-  
PULPROG zg30  
TD 32768  
SOLVENT CDCl3  
NS 32  
DS 2  
SWH 7183.908 H  
FIDRES 0.219235 H  
AQ 2.2807028 s  
RG 228.1  
DW 69.600 u  
DE 6.50 u  
TE 298.2 K  
D1 2.00000000 s  
TD0 1  
===== CHANNEL f1 =====  
NUC1 1H  
P1 14.00 u  
PL1 0.00 dB  
SFO1 400.1428010 M  
SI 32768  
SF 400.1400000 M  
WDW EM  
SSB 0  
LB 0.30 H  
GB 0  
PC 1.00

2.361  
2.180

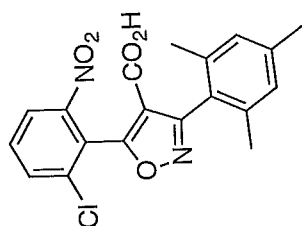

18

8.271  
8.251  
7.893  
7.873  
7.750  
7.729  
7.709  
7.283  
6.976

2.91  
5.93

1.84

0.98

0.94

1.00

9.5 9.0 8.5 8.0 7.5 7.0 6.5 6.0 5.5 5.0 4.5 4.0 3.5 3.0 2.5 2.0 1.5 1.0 0.5 ppm

NAME MLM-IV-020  
EXPNO 6  
PROCNO 1  
Date\_ 20120330  
Time 11.12  
INSTRUM spect  
PROBHD 5 mm CPDCH 13C  
PULPROG zgpg30  
TD 65536  
SOLVENT CDCl3  
NS 845  
DS 4  
SMH 41666.668 H  
FIDRES 0.635783 H  
AQ 0.7864820 S  
RG 203  
DW 12.000 u  
DE 16.50 u  
TE 298.2 K  
D1 2.00000000 S  
D11 0.03000000 S  
TD0 1  
===== CHANNEL f1 =====  
NUC1 13C  
P1 9.00 u  
PL1 4.50 d  
PL1W 38.14553833 W  
SFO1 176.0697436 M  
===== CHANNEL f2 =====  
CPDPRG2 waltz16  
NUC2 1H  
PCPD2 65.00 u  
PL2 -3.20 d  
PL12 13.60 d  
PL13 120.00 d  
PL2W 33.59817505 W  
PL12W 0.70196527 W  
PL13W 0.00000000 W  
SFO2 700.1499406 M  
SI 32768  
SF 176.0521380 M  
WDW EM  
SSB 0  
LB 3.00 H  
GB 0  
PC 1.40

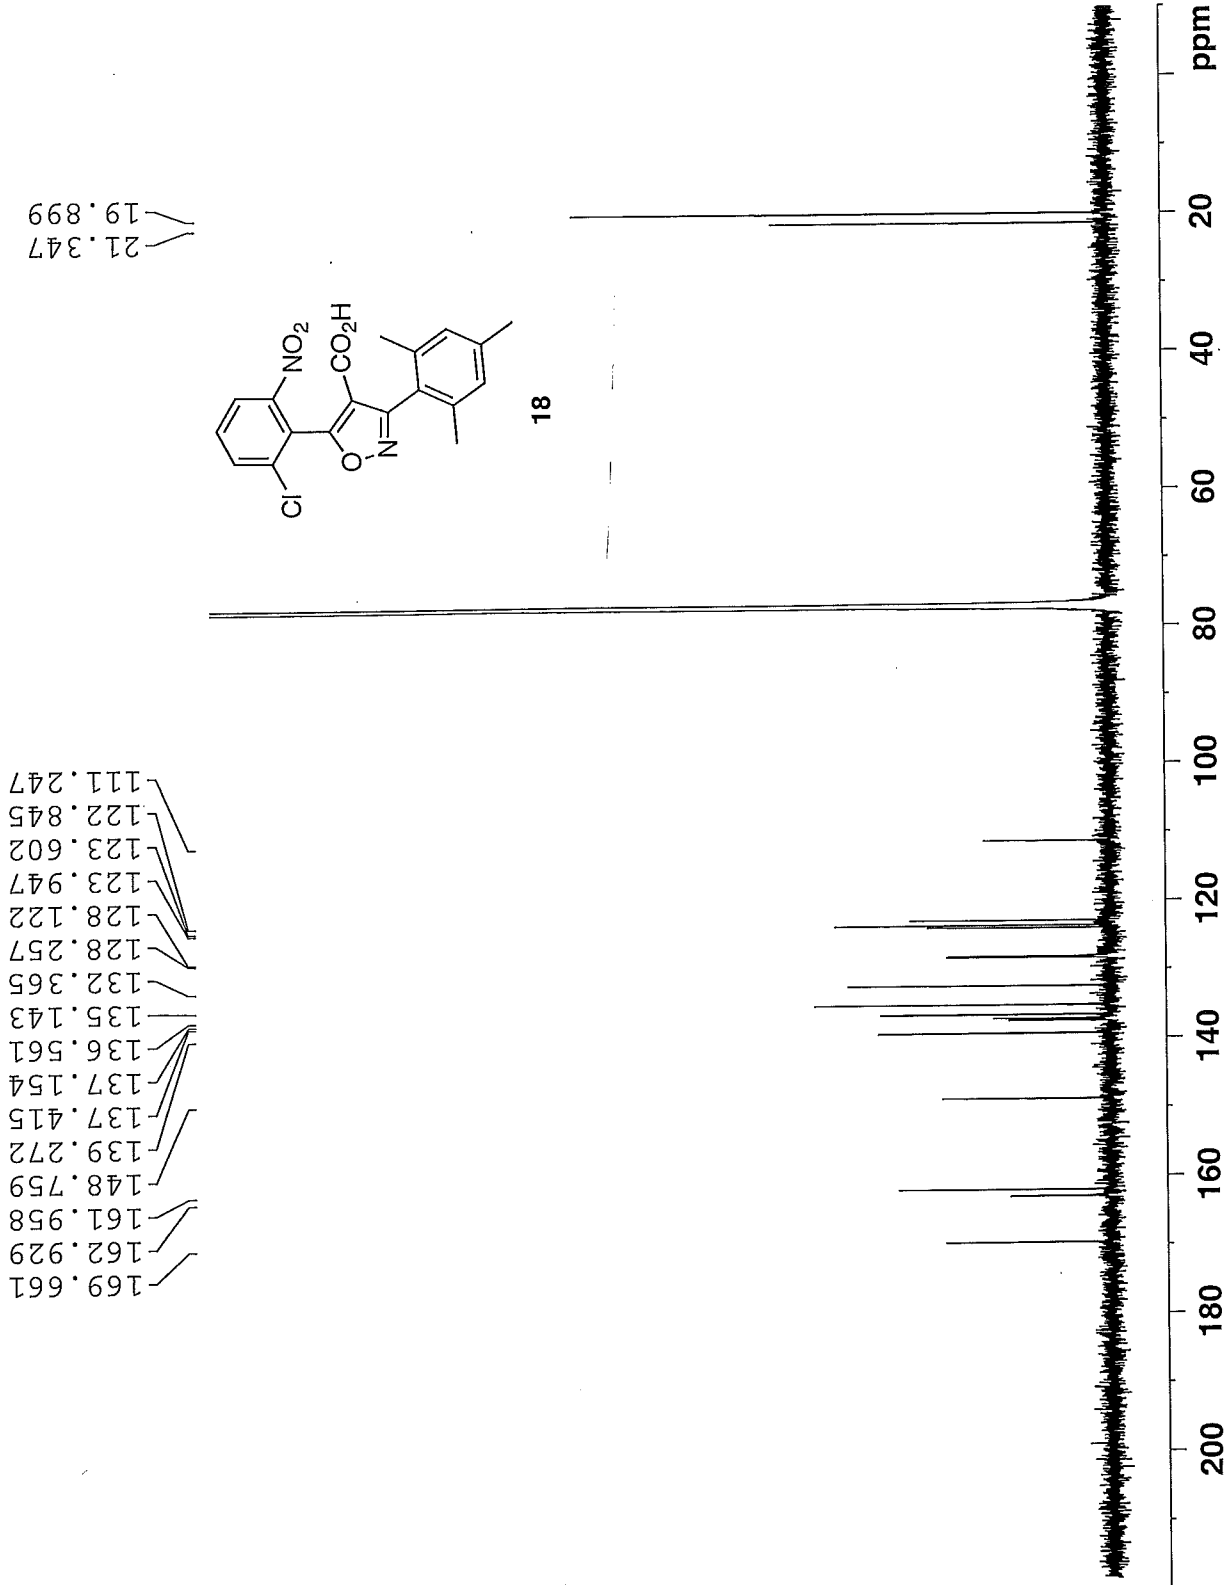

NAME MLM-IV-023  
EXPNO 1  
PROCNO 1  
Date\_ 20120327  
Time 15.04  
INSTRUM spect  
PROBHD 5 mm CPDCH 13C  
PULPROG zg30  
TD 95236  
SOLVENT CDCl3  
NS 5  
DS 2  
SWH 11904.762 H  
FIDRES 0.125003 H  
AQ 3.9999621 s  
RG 203  
DW 42.000 u  
DE 6.50 u  
TE 298.2 K  
D1 2.0000000 s  
TD0 1  
===== CHANNEL f1 =====  
NUC1 1H  
P1 9.40 u  
PL1 -3.20 d  
PL1W 33.59817505 W  
SFO1 700.1516910 M  
SI 131072  
SF 700.1471400 M  
WDW EM  
SSB 0  
LB 0.30 H  
GB 0  
PC 1.00

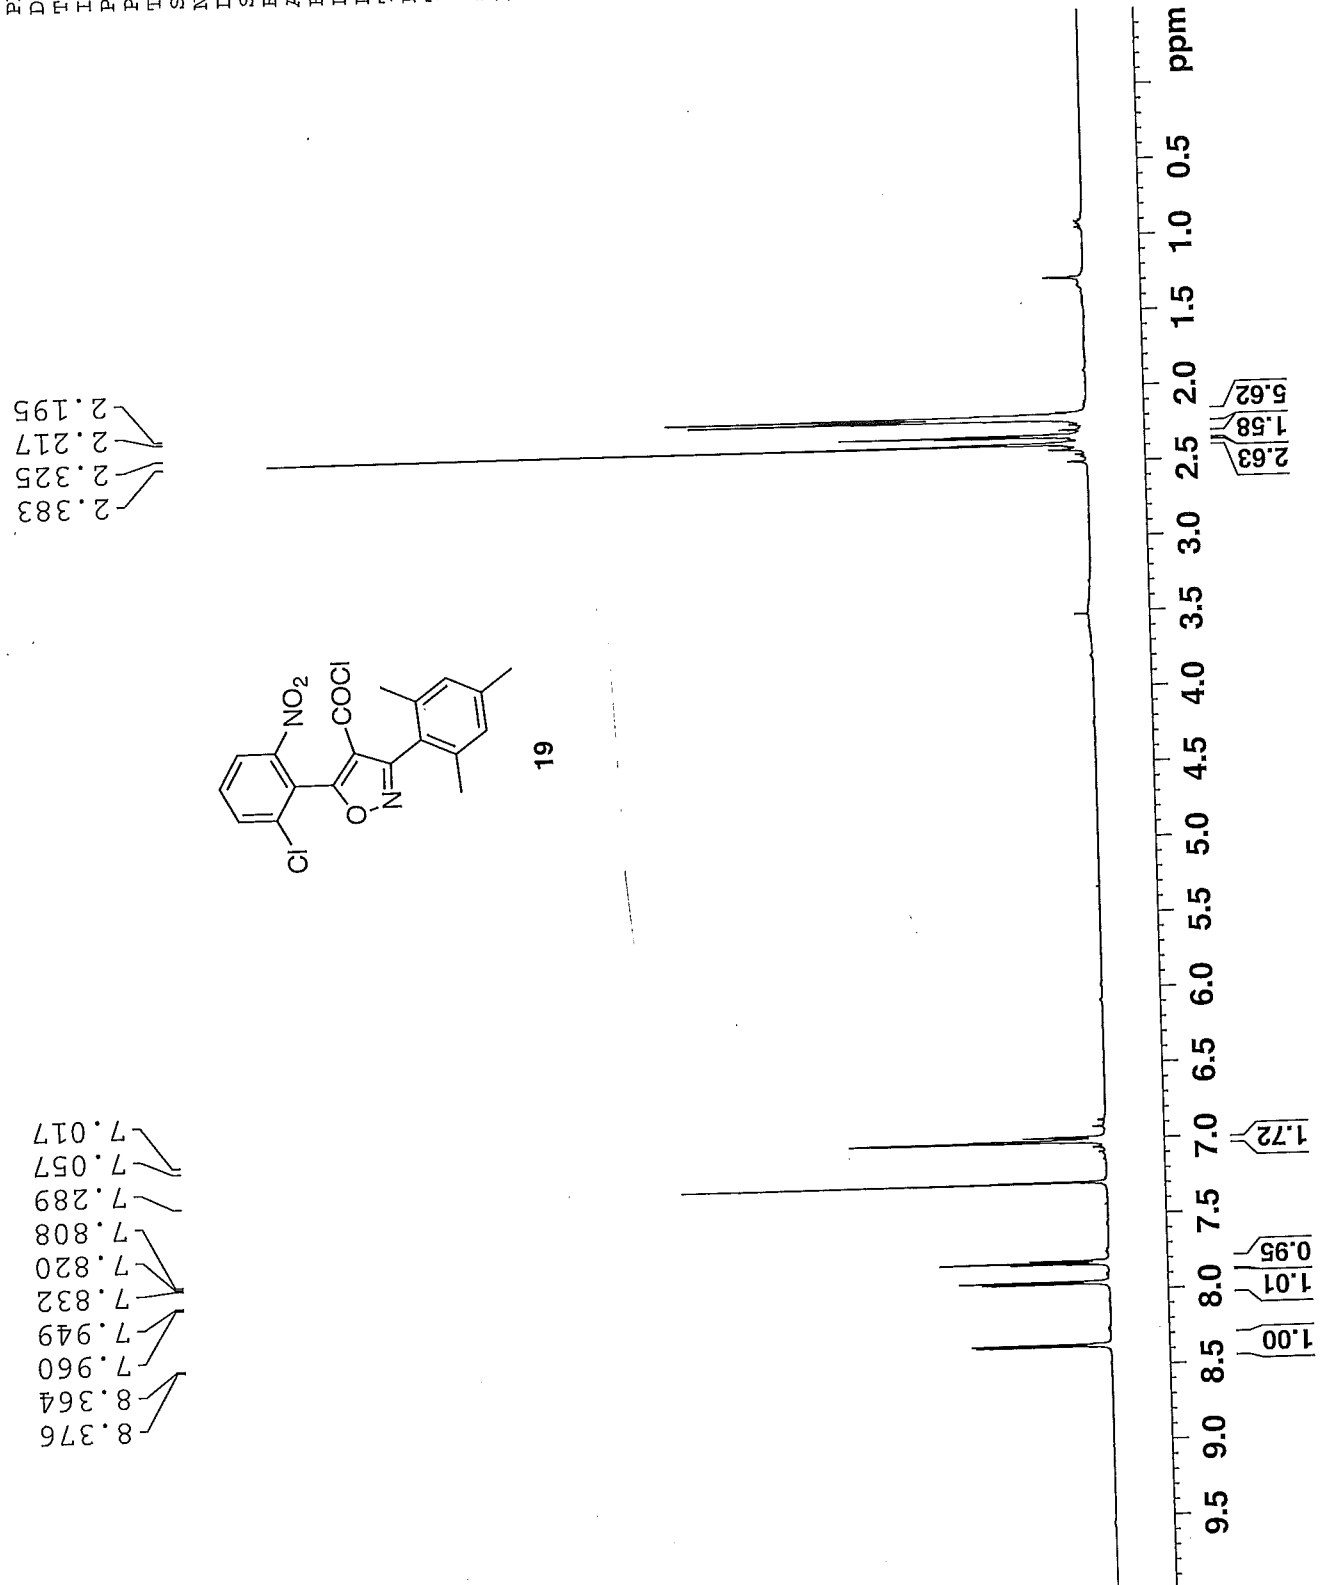

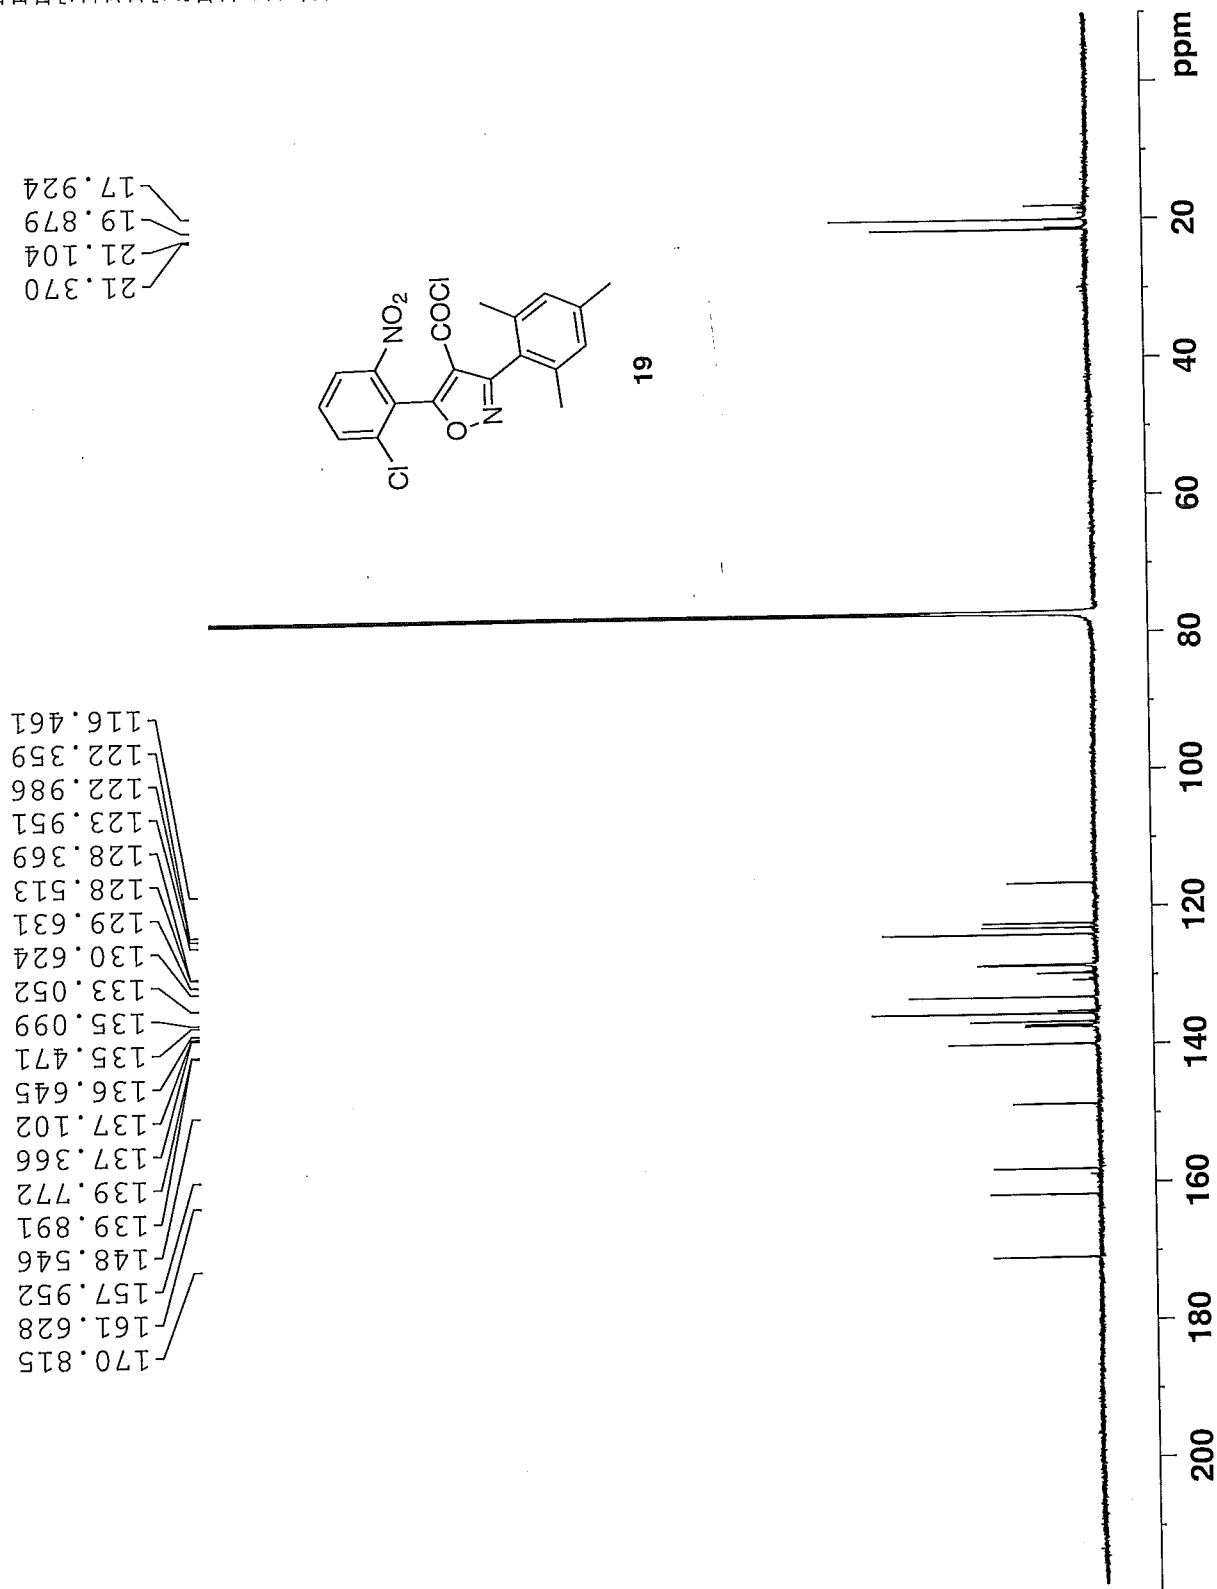

fractions 13-16

8.268  
8.256  
7.878  
7.866  
7.717  
7.705  
7.694  
7.288  
7.249  
7.239  
7.234  
7.231  
7.226  
6.929  
6.865  
6.864  
6.855  
5.519

4.258  
4.252  
4.186  
4.181

2.298  
2.167  
1.596  
1.283

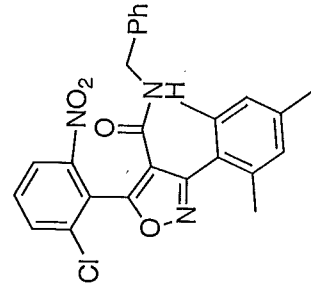

22

NAME MLM-IV-033  
EXPNO 3  
PROCNO 1  
Date\_ 20120416  
Time 11.59  
INSTRUM spect  
PROBHD 5 mm CPDCH 13C  
PULPROG zg30  
TD 95236  
SOLVENT CDC13  
NS 3  
DS 2  
SWH 11904.762 Hz  
FIDRES 0.125003 Hz  
AQ 3.9999621 s  
RG 36  
DW 42.000 us  
DE 6.50 us  
TE 303.2 K  
D1 303.2 K  
TD0 2.0000000 s  
1

===== CHANNEL f1 =====  
NUC1 1H  
P1 9.40 us  
PL1 -3.20 dB  
PL1W 33.59817505 W  
SFO1 700.1516910 MHz  
SI 131072  
SF 700.1471400 MHz  
WDW EM  
SSB 0  
LB 0.30 Hz  
GB 0  
PC 1.00

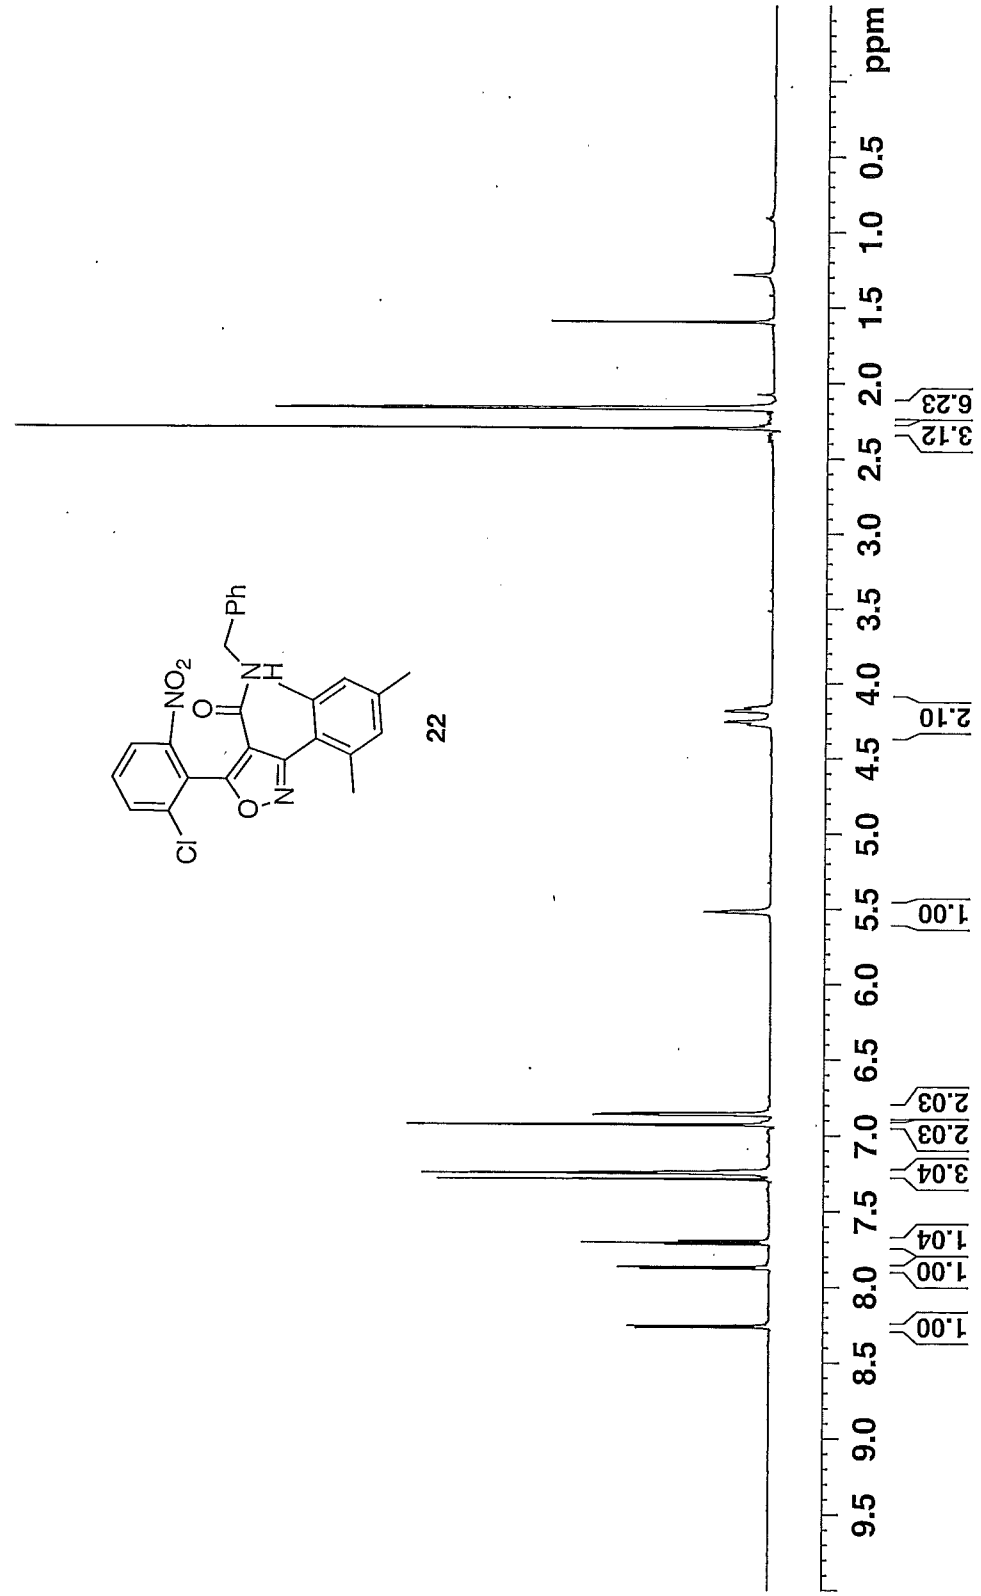

NAME MLM-IV-033  
EXPNO 4  
PROCNO 1  
Date\_ 20120416  
Time 12.02  
INSTRUM spect  
PROBHD 5 mm CPDCH 13C  
PULPROG zgpg30  
TD 65536  
SOLVENT CDC13  
NS 103  
DS 4  
SWH 41666.668 H  
FIDRES 0.635783 H  
AQ 0.7864820 s  
RG 203  
DW 12.000 u  
DE 16.50 u  
TE 303.2 K  
D1 2.00000000 s  
D11 0.03000000 s  
TD0 1  
===== CHANNEL f1 =====  
NUC1 13C  
P1 9.00 u  
PL1 4.50 d  
PL1W 38.14553833 W  
SFO1 176.0697436 M  
===== CHANNEL f2 =====  
CPDPRG2 waltz16  
NUC2 1H  
PCPD2 65.00 u  
PL2 -3.20 d  
PL12 13.60 d  
PL13 120.00 d  
PL2W 33.59817505 W  
PL12W 0.70196527 W  
PL13W 0.00000000 W  
SFO2 700.1499406 M  
SI 32768  
SF 176.0521380 M  
WDW EM  
SSB 0  
LB 3.00 H  
GB 0  
PC 1.40

fractions 13-16

168.169  
159.192  
159.104  
149.227  
140.664  
138.002  
137.336  
136.843  
136.649  
134.845  
131.895  
129.235  
129.025  
128.548  
127.468  
127.184  
123.615  
123.392  
123.257  
113.634

43.252

21.256  
19.751

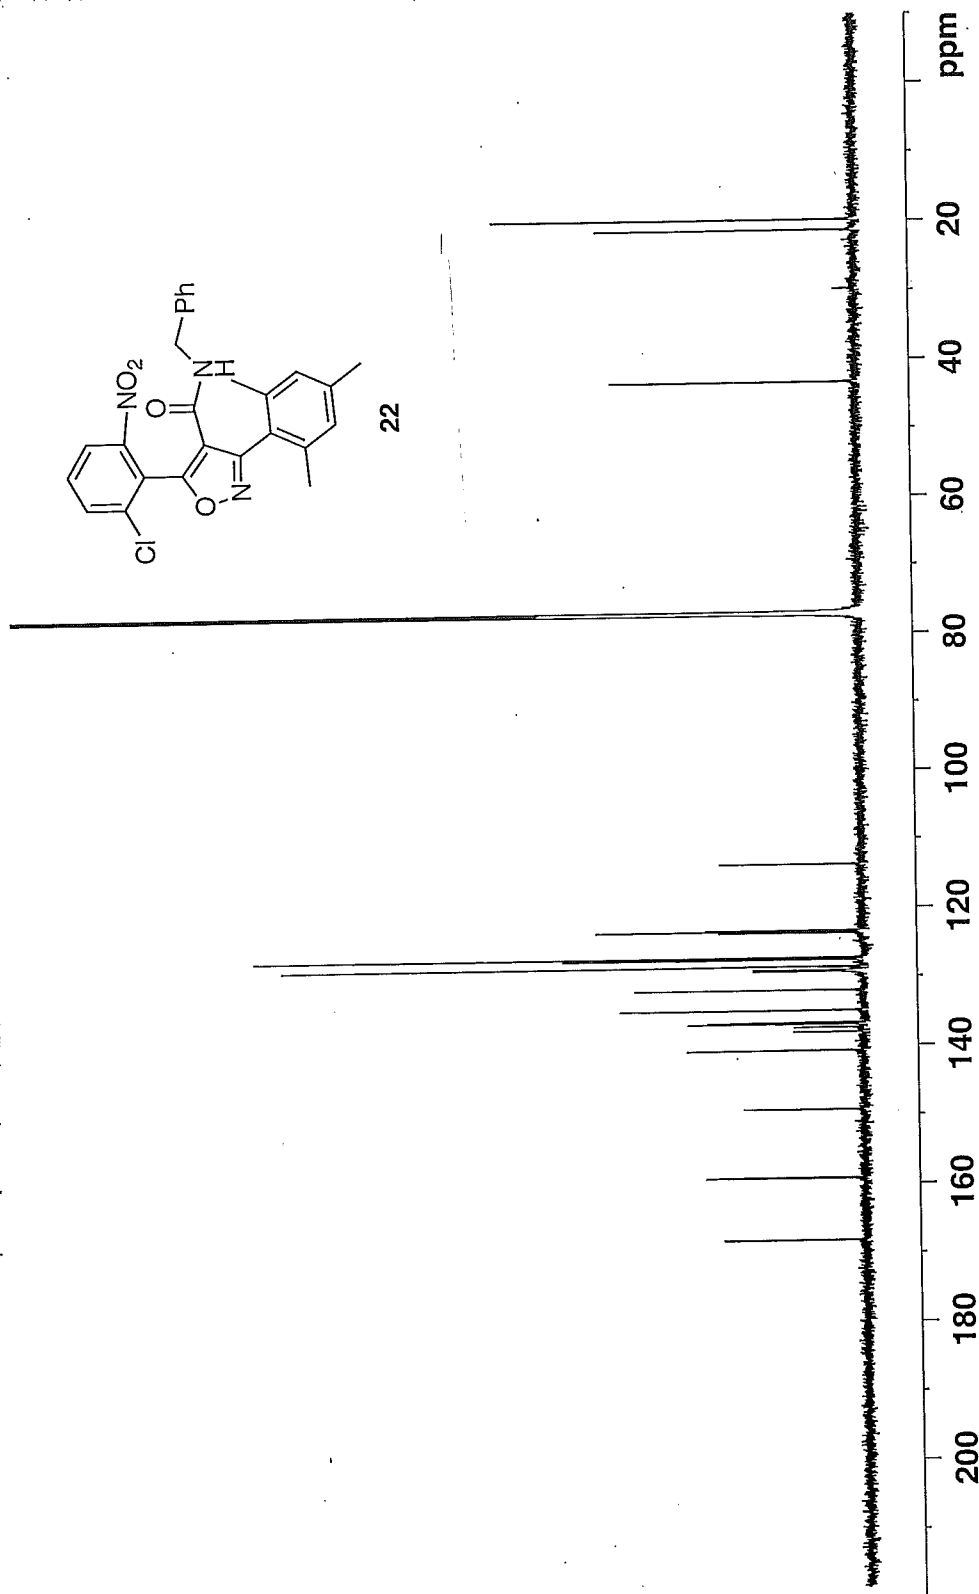



NAME MLM-IV-038  
EXPNO 3  
PROCNO 1  
Date\_ 20120503  
Time 21.05  
INSTRUM robinson  
PROBHD 5 mm PABBO BB-  
PULPROG zg30  
TD 32768  
SOLVENT CDCl3  
NS 14  
DS 2  
SWH 7183.908 H  
FIDRES 0.219235 H  
AQ 2.2807028 s  
RG 161.3  
DW 69.600 u  
DE 6.50 u  
TE 298.3 K  
D1 2.0000000 s  
TD0 1  
===== CHANNEL f1 =====  
NUC1 1H  
P1 14.00 u  
PL1 0.00 d  
SF01 400.1428010 M  
SI 32768  
SF 400.1400000 M  
WDW EM  
SSB 0  
LB 0.30 H  
GB 0  
PC 1.00

Fractions 18-22

8.245  
8.225  
7.845  
7.698  
7.677  
7.657  
7.282  
7.228  
7.220  
7.212  
7.202  
7.128  
7.101  
6.963  
6.941  
6.808  
6.801  
6.793  
6.785  
5.655  
5.636  
4.899  
4.882  
4.864

2.393  
2.283  
2.263  
2.091  
1.572  
1.278  
1.150

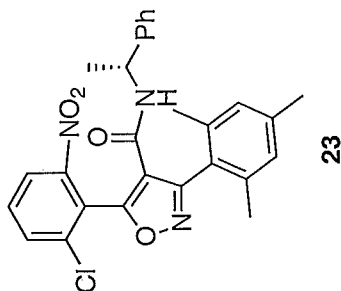

23

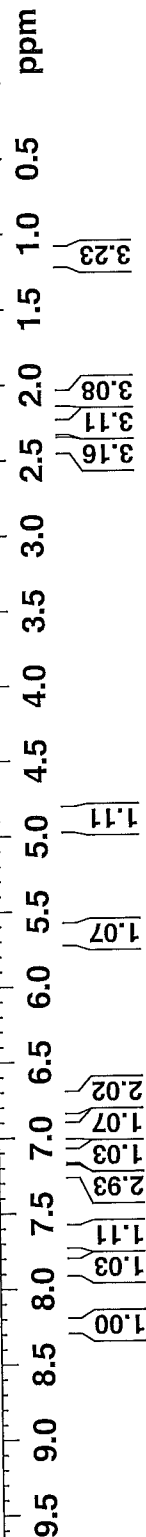

NAME MLM-IV-038  
EXPNO 6  
PROCNO 1  
Date\_ 20120503  
Time 21.36  
INSTRUM spect  
PROBHD 5 mm CPDCH 13C  
PULPROG zgpg30  
TD 65536  
SOLVENT CDCl3  
NS 239  
DS 4  
SWH 41666.668 H  
FIDRES 0.635783 H  
AQ 0.7864820 s  
RG 203  
DE 12.000 u  
TE 16.50 u  
D1 298.2 K  
D11 2.00000000 s  
D11 0.03000000 s  
TD0 1  
===== CHANNEL f1 =====  
NUC1 13C  
P1 9.00 u  
PL1 4.50 d  
PL1W 38.14553833 W  
SFO1 176.0697436 M  
===== CHANNEL f2 =====  
CPDPRG2 waltz16  
NUC2 1H  
PCPD2 65.00 u  
PL2 -3.20 d  
PL12 13.60 d  
PL13 120.00 d  
PL2W 33.59817505 W  
PL12W 0.70196527 W  
PL13W 0.00000000 W  
SFO2 700.1499406 M  
SI 32768  
SF 176.0521380 M  
EM 0  
SSB 3.00 H  
LB 0  
GB 0  
PC 1.40

19.639  
19.725  
21.282  
22.196  
48.545

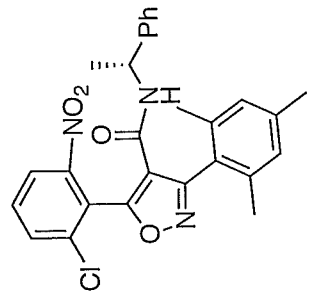

167.981  
159.095  
158.309  
149.225  
142.436  
140.784  
138.358  
136.642  
134.778  
131.768  
129.357  
129.175  
128.881  
128.514  
127.290  
125.453  
123.633  
123.343  
113.826

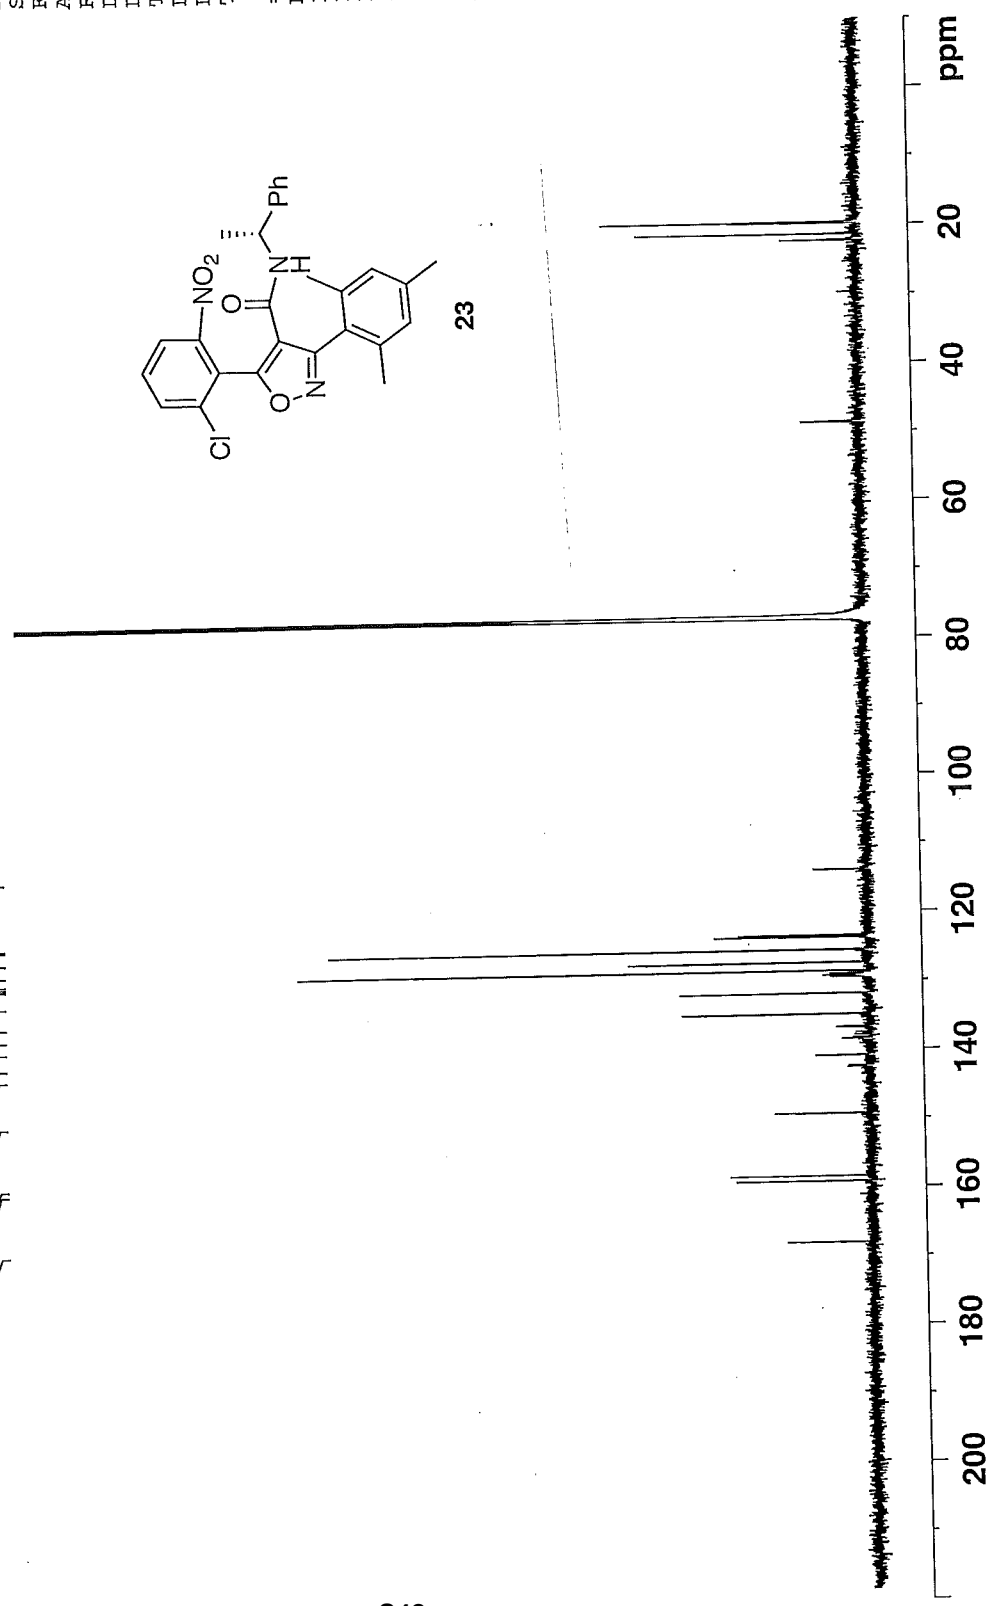

ph coupled oxazole

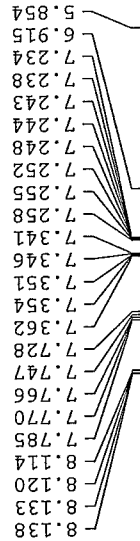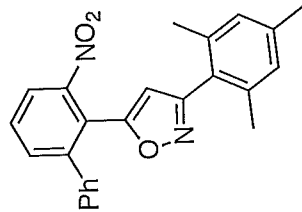

24

2.322  
2.025

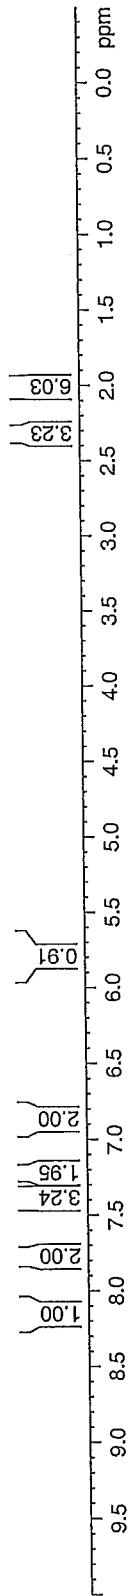

Current Data Parameters  
NAME MRN10079  
EXPNO 10  
PROCNO 1  
DU /n  
USER michaeln

F2 - Acquisition Parameters  
Date\_ 20090703  
Time 10.57  
INSTRUM DFX400  
PROBHD 5 mm BBO BB-1H  
PULPROG zg30  
TD 32768  
SOLVENT  
NS 20  
DS 2  
SWH 6410.256 Hz  
FIDRES 0.195625 Hz  
AQ 2.5559540 sec  
RG 80.6  
DW 78.000 usec  
DE 6.00 usec  
TE 299.2 K  
D1 2.0000000 sec  
TD0 1

===== CHANNEL f1 =====  
NUC1 1H  
P1 14.70 usec  
PL1 0.00 dB  
SFO1 399.9528000 MHz

F2 - Processing parameters  
SI 32768  
SF 399.9500000 MHz  
WDW no  
SSB 0  
LB 0.00 Hz  
GB 0  
PC 1.00

ph coupled oxazole

Current Data Parameters  
NAME MRN10079  
EXPNO 11  
PROCNO 2  
DU /n  
USER michaeln

F2 - Acquisition Parameters  
Date\_ 20090703  
Time 11.13  
INSTRUM DPK400  
PROBHD 5 mm BBO BB-1H  
PULPROG zgpg30  
TD 65536  
SOLVENT  
NS 507  
DS 4  
SWH 25125.629 Hz  
FIDRES 0.383387 Hz  
AQ 1.3042164 sec  
RG 16384  
DW 19.900 usec  
DE 6.00 usec  
TE 299.2 K  
D1 0.15000001 sec  
d11 0.03000000 sec  
DELTA 0.05000000 sec  
TD0 1

==== CHANNEL f1 =====  
NUC1 13C  
P1 13C  
PL1 7.80 usec  
SF01 100.5785700 MHz

==== CHANNEL f2 =====  
CPDPRG2 waltz16  
NUC2 1H  
PCPD2 135.00 usec  
PL2 17.40 dB  
PL12 17.40 dB  
PL13 17.40 dB  
SF02 399.9516000 MHz

F2 - Processing parameters  
SI 65536  
SF 100.5675080 MHz  
WDW EM  
SSB 0  
LB 0.30 Hz  
GB 0  
PC 1.40

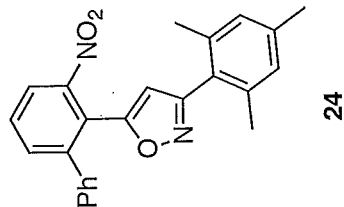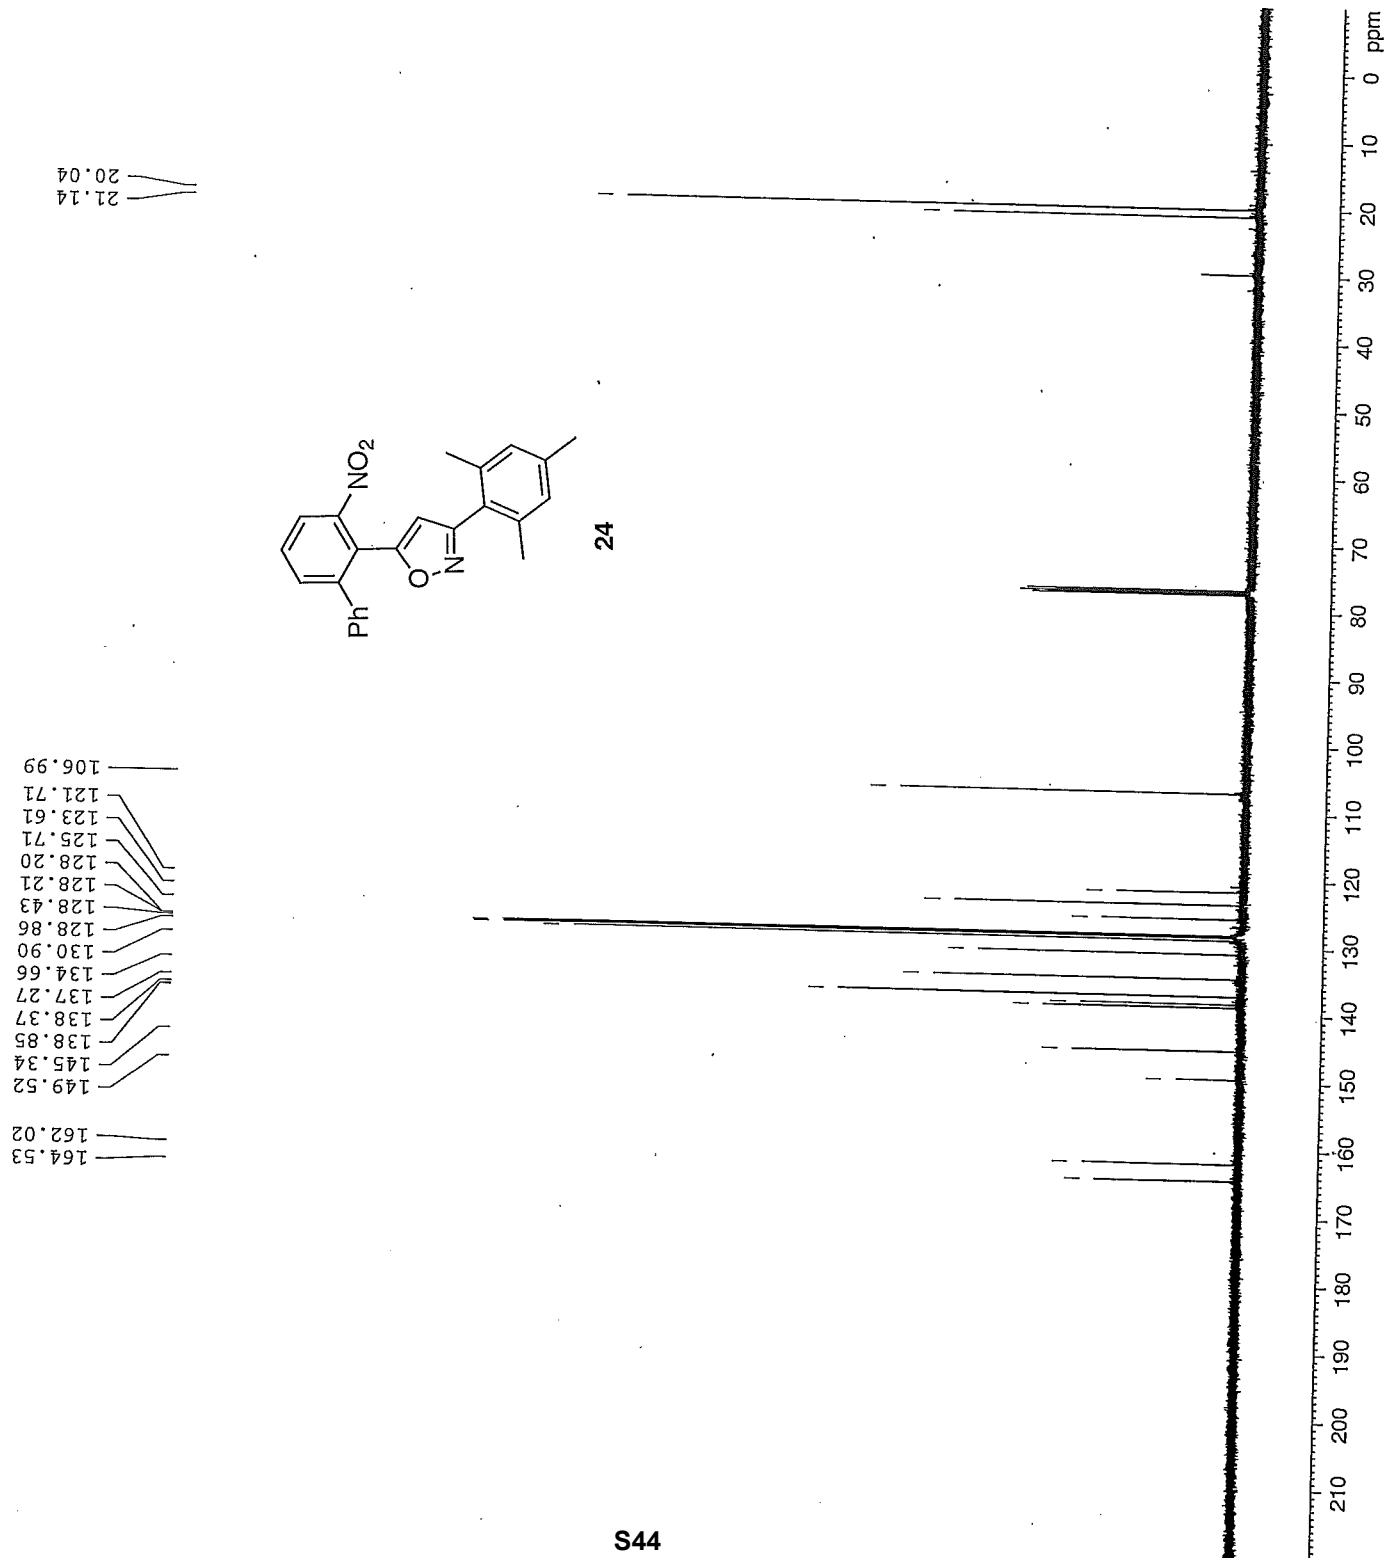

NAME MLM-TV-039  
EXPNO 2  
PROCNO 1  
Date\_ 20120503  
Time\_ 19.50  
INSTRUM robinson  
PROBHD 5 mm PABBO BB-  
PULPROG zg30  
TD 32768  
SOLVENT CDCl3  
NS 7  
DS 2  
SWH 7183.908 H  
FIDRES 0.219235 H  
AQ 2.2807028 s  
RG 161.3  
DW 69.600 u  
DE 6.50 u  
TE 298.2 K  
D1 2.00000000 s  
TD0 1  
===== CHANNEL f1 =====  
NUC1 1H  
P1 14.00 u  
PL1 0.00 d  
SFO1 400.1428010 M  
SI 32768  
SF 400.1400000 M  
WDW EM  
SSB 0  
LB 0.30 H  
GB 0  
PC 1.00

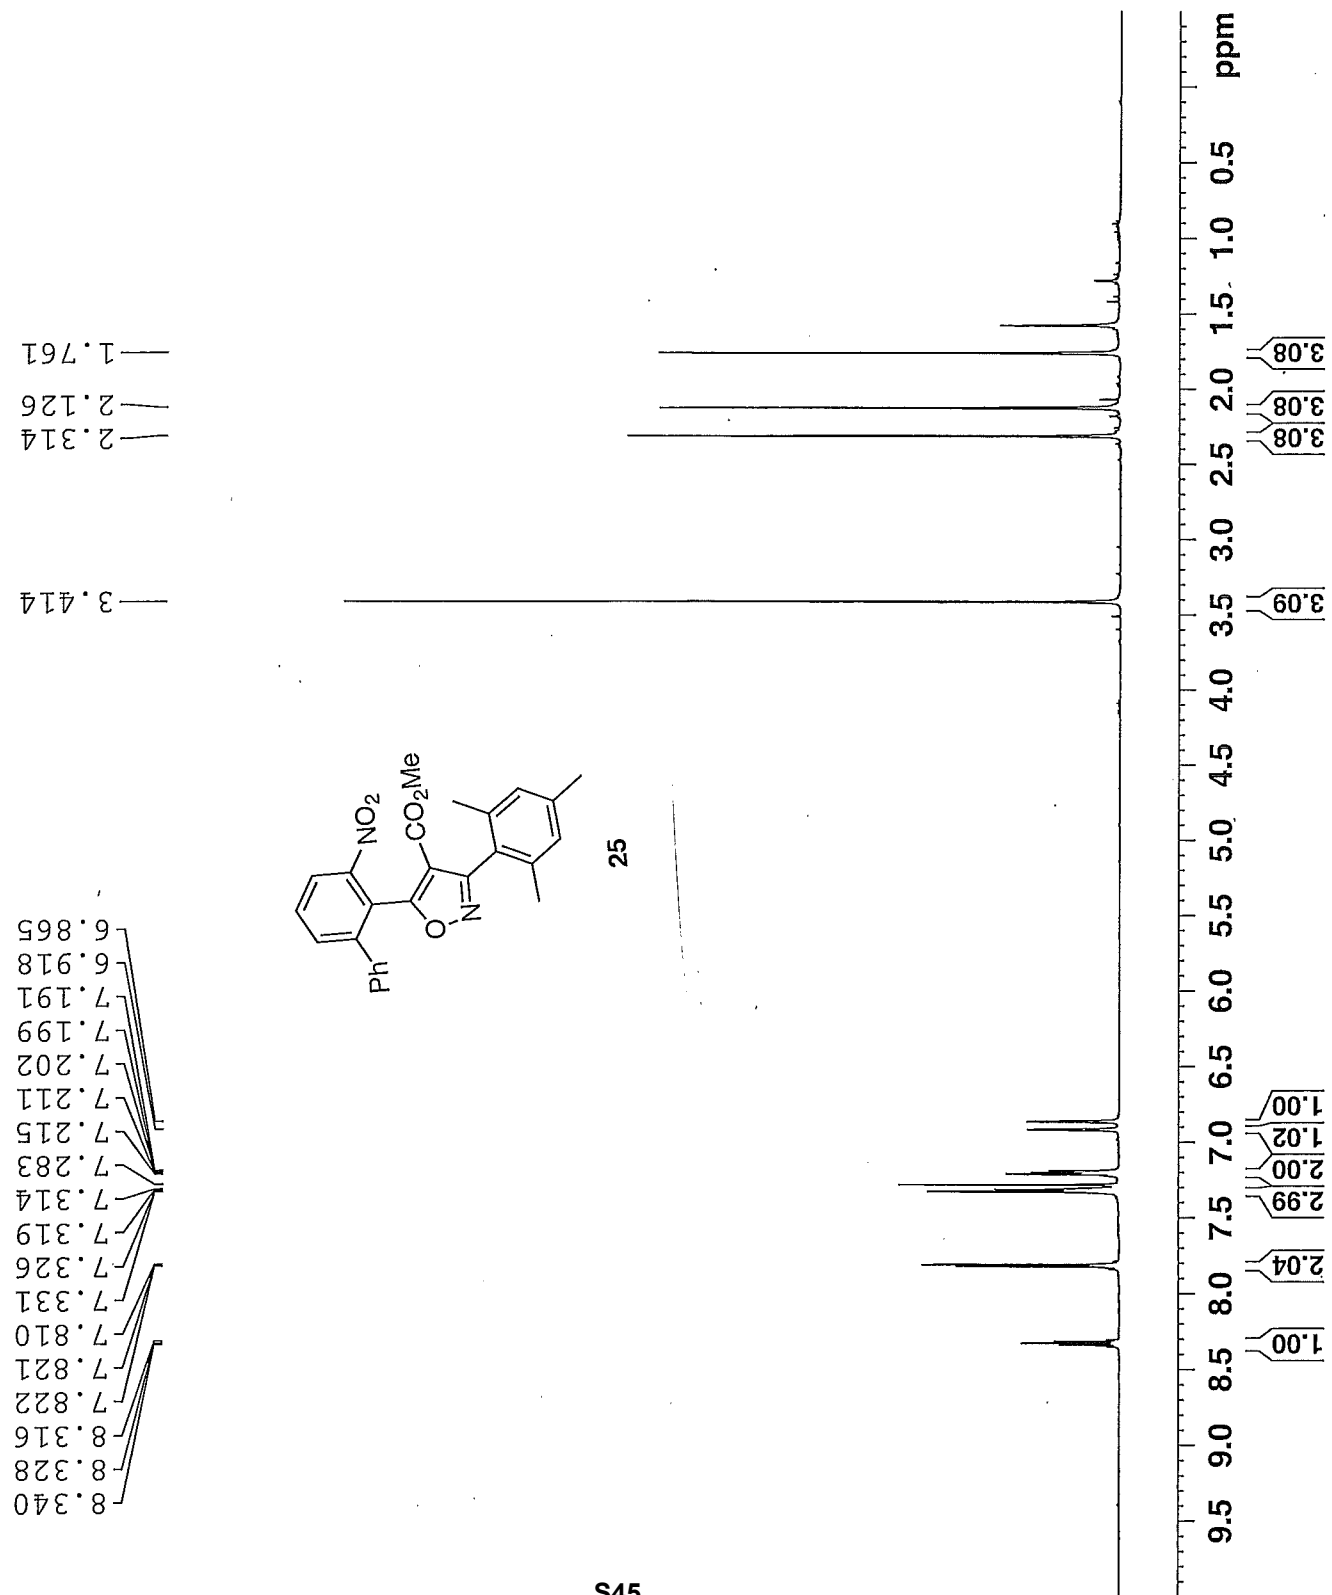

Current Data Parameters  
NAME MLM-I-047  
EXPNO 7  
PROCNO 1

F2 - Acquisition Parameters  
Date\_ 20120501  
Time 11.20  
INSTRUM DFX400  
PROBHD 5 mm Multinucl  
PULPROG zgpg30  
TD 65536  
SOLVENT CDCl3  
NS 3884  
DS 4  
SWH 23980.814 Hz  
FIDRES 0.365918 Hz  
AQ 1.3664756 sec  
RG 32768  
DW 20.850 usec  
DE 6.00 usec  
TE 299.2 K  
D1 0.20000000 sec  
d11 0.03000000 sec  
DELTA 0.10000000 sec  
TD0 1

==== CHANNEL f1 =====  
NUC1 13C  
P1 8.30 usec  
PL1 -3.00 dB  
SFO1 100.6555216 MHz

==== CHANNEL f2 =====  
CPDPRG2 waltz16  
NUC2 1H  
PCPD2 90.00 usec  
PL2 -3.00 dB  
PL12 15.00 dB  
PL13 15.00 dB  
SFO2 400.2620013 MHz

F2 - Processing parameters  
SI 32768  
SF 100.6454570 MHz  
WDW EM  
SSB 0  
LB 1.00 Hz  
GB 0  
PC 1.40

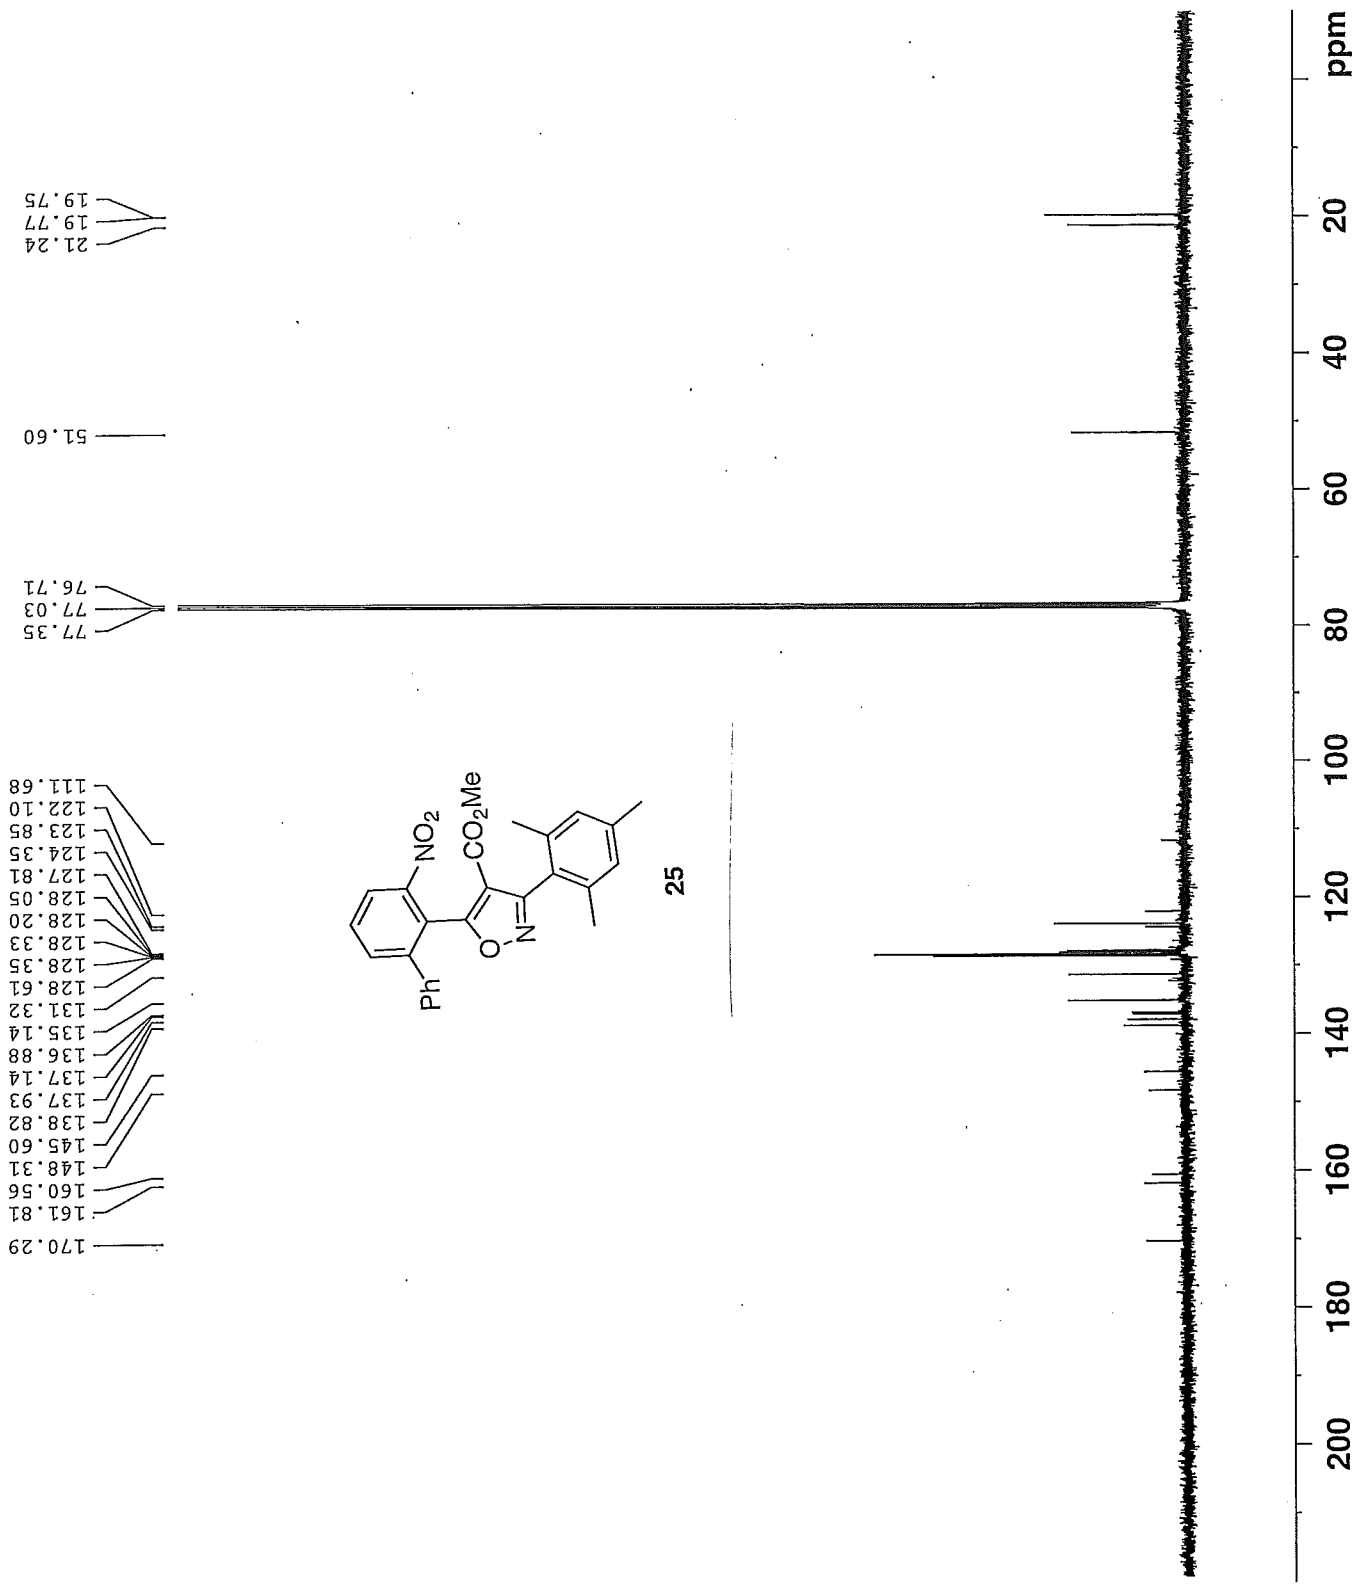

Supplement: c2ob26267c.pdf [file c2ob26267c.pdf]
